# Supplementary material for: Validation of breast cancer risk assessment tools on a French-Canadian population-based cohort
Source: PubMed Central journal article supplement — BMJ Open. 2021 Apr 12;11(4):e045078. doi: 10.1136/bmjopen-2020-045078 (PMC8047995; doi:10.1136/bmjopen-2020-045078), 2021-04-12
Supplement: bmjopen-2020-045078.draft_revisions.pdf [file bmjopen-2020-045078.draft_revisions.pdf]

# BMJ Open

BMJ Open is committed to open peer review. As part of this commitment we make the peer review history of every article we publish publicly available.

When an article is published we post the peer reviewers' comments and the authors' responses online. We also post the versions of the paper that were used during peer review. These are the versions that the peer review comments apply to.

The versions of the paper that follow are the versions that were submitted during the peer review process. They are not the versions of record or the final published versions. They should not be cited or distributed as the published version of this manuscript.

BMJ Open is an open access journal and the full, final, typeset and author-corrected version of record of the manuscript is available on our site with no access controls, subscription charges or pay-per-view fees (<http://bmjopen.bmj.com>).

If you have any questions on BMJ Open's open peer review process please email [info.bmjopen@bmj.com](mailto:info.bmjopen@bmj.com)

# BMJ Open

## Validation of breast cancer risk assessment tools on a French-Canadian population-based cohort

|                               |                                                                                                                                                                                                                                                                                                                                                         |
|-------------------------------|---------------------------------------------------------------------------------------------------------------------------------------------------------------------------------------------------------------------------------------------------------------------------------------------------------------------------------------------------------|
| Journal:                      | <i>BMJ Open</i>                                                                                                                                                                                                                                                                                                                                         |
| Manuscript ID                 | bmjopen-2020-045078                                                                                                                                                                                                                                                                                                                                     |
| Article Type:                 | Original research                                                                                                                                                                                                                                                                                                                                       |
| Date Submitted by the Author: | 21-Sep-2020                                                                                                                                                                                                                                                                                                                                             |
| Complete List of Authors:     | Jantzen, Rodolphe; CHU Sainte-Justine, Centre de recherche Payette, Yves; CHU Sainte-Justine Centre de Recherche de Malliard, Thibault; CHU Sainte-Justine Centre de Recherche Labbé, Catherine; CHU Sainte-Justine Centre de Recherche Noisel, Nolwenn; CHU Sainte-Justine Centre de Recherche Broët, Philippe; CHU Sainte-Justine Centre de Recherche |
| Keywords:                     | Breast tumours < ONCOLOGY, EPIDEMIOLOGY, GENETICS, PREVENTIVE MEDICINE, PUBLIC HEALTH                                                                                                                                                                                                                                                                   |
|                               |                                                                                                                                                                                                                                                                                                                                                         |

SCHOLARONE™  
Manuscripts

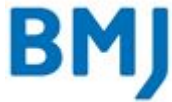

I, the Submitting Author has the right to grant and does grant on behalf of all authors of the Work (as defined in the below author licence), an exclusive licence and/or a non-exclusive licence for contributions from authors who are: i) UK Crown employees; ii) where BMJ has agreed a CC-BY licence shall apply, and/or iii) in accordance with the terms applicable for US Federal Government officers or employees acting as part of their official duties; on a worldwide, perpetual, irrevocable, royalty-free basis to BMJ Publishing Group Ltd ("BMJ") its licensees and where the relevant Journal is co-owned by BMJ to the co-owners of the Journal, to publish the Work in this journal and any other BMJ products and to exploit all rights, as set out in our [licence](#).

The Submitting Author accepts and understands that any supply made under these terms is made by BMJ to the Submitting Author unless you are acting as an employee on behalf of your employer or a postgraduate student of an affiliated institution which is paying any applicable article publishing charge ("APC") for Open Access articles. Where the Submitting Author wishes to make the Work available on an Open Access basis (and intends to pay the relevant APC), the terms of reuse of such Open Access shall be governed by a Creative Commons licence – details of these licences and which [Creative Commons](#) licence will apply to this Work are set out in our licence referred to above.

Other than as permitted in any relevant BMJ Author's Self Archiving Policies, I confirm this Work has not been accepted for publication elsewhere, is not being considered for publication elsewhere and does not duplicate material already published. I confirm all authors consent to publication of this Work and authorise the granting of this licence.

# Validation of breast cancer risk assessment tools on a French-Canadian population-based cohort

Rodolphe Jantzen<sup>1,2,\*</sup>, Yves Payette<sup>1</sup>, Thibault de Malliard<sup>1</sup>, Catherine Labbé<sup>1</sup>, Nolwenn Noisel<sup>1,2</sup>, Philippe Broët<sup>1,2,3,4,\*</sup>

<sup>1</sup>CARTaGENE, Research Center, CHU Sainte-Justine, Montreal, Quebec, Canada

<sup>2</sup>Université de Montréal, Montréal, Québec, Canada

<sup>3</sup>University Paris-Saclay, CESP, INSERM, Villejuif, France

<sup>4</sup>Assistance Publique-Hôpitaux de Paris (AP-HP), Hôpitaux Universitaires Paris-Sud, Hôpital Paul Brousse, 12 Avenue Paul Vaillant Couturier, 94807 Villejuif, France

## \* Correspondence:

Rodolphe Jantzen, rodolphe.jantzen@gmail.com

Philippe Broët, philippe.broet@umontreal.ca

**Keywords:** Breast cancer, Validation Study, Clinical Decision Rules, Polygenic risk score, BCRAT, IBIS

## Abstract

**Objectives:** Evaluate the accuracy of the Breast Cancer Risk Assessment Tool (BCRAT), International Breast Cancer Intervention Study risk evaluation tool (IBIS), polygenic risk scores (PRS) and combined scores (BCRAT+PRS) to predict the occurrence of invasive breast cancers at five years in a French-Canadian population.

**Design:** Population-based cohort study.

**Setting:** We used the population-based cohort CARTaGENE, composed of 43,037 Quebec residents aged between 40 and 69 years and recruited during two phases (2009-2010 and 2013-2014).



1  
2 Participants were randomly selected to be broadly representative of the population recorded on the  
3 Quebec administrative health insurance registries.  
4

5  
6 **Participants:** 10,200 women were included for validating BCRAT and IBIS and 4,555 with clinical  
7 and genetic information for validating the PRS and combined scores.  
8  
9

10  
11 **Outcome measures:** We computed the absolute risks of breast cancer at five years using BCRAT,  
12 IBIS, four published PRS and combined models. We reported the overall calibration performance,  
13 goodness-of-fit test and discriminatory accuracy.  
14  
15

16  
17 **Results:** 131 (1.28%) women developed a breast cancer at five years for validating BCRAT and IBIS  
18 and 58 (1.27%) for validating PRS and combined scores. Median follow-up was 5 years. BCRAT and  
19 IBIS had an expected-to-observed ratio of 1.01 [0.85-1.19] and 1.02 [0.86-1.21]. IBIS' c-index was  
20 significantly higher than BCRAT (63.42 [59.35-67.49] versus 58.63 [54.05-63.21],  $p=0.013$ ). All the  
21 PRS scores had a global calibration around 0.82, with a confidence interval including one, and non-  
22 significant goodness-of-fit tests. PRS' c-indexes were non-significantly higher than BCRAT and  
23 IBIS, the highest being 64.43 [58.23-70.63]. Combined models (BCRAT+PRS) did not improve the  
24 results.  
25  
26  
27  
28  
29  
30

31  
32 **Conclusions:** In this French-Canadian population-based cohort, BCRAT and IBIS are globally well  
33 calibrated but with modest discriminatory accuracy. Despite this modest discriminatory power, these  
34 tools can be of interest for primary care physicians for delivering a personalized message to their  
35 high risk patients, regarding screening and lifestyle counseling.  
36  
37  
38  
39

#### 40 **Strengths and limitations of this study**

- 41  
42 • First study to evaluate risk assessment tools in a French-Canadian population for predicting  
43 breast cancer.  
44
- 45  
46 • Population based-cohort representative of the French-Canadian urban population of middle-  
47 aged and older adults.  
48  
49
- 50  
51 • Linkage with administrative health databases and the Quebec Breast Cancer Registry, which  
52 improved the outcome quality and accuracy, and made possible to use variables usually  
53 difficult to obtain.  
54  
55
- 56  
57 • May not apply to younger women under forty years old.  
58  
59

- Since the genotyping information was not available for all the cohort, the models had to be evaluated on two different sub-cohorts.

## 1 Introduction

Breast cancer is the most frequently diagnosed cancer and the second leading cause of death by cancer among the Canadian women [1]. However, assessing the individual risk of breast cancer remains a challenge. In this context, risk prediction models have been developed and implemented. The two most widely used are the Breast Cancer Risk Assessment Tool (BCRAT) and the International Breast Cancer Intervention Study risk evaluation tool (IBIS) [2,3].

The National Cancer Institute's BCRAT was developed by Dr. Mitchell Gail in 1989 using 5,998 American women from a case-control study [2]. It provides an estimate of a woman's risk of developing invasive breast cancer over a specific period, knowing her personal risk factors. After its first release, this model has been validated in an American cohort [4], mainly composed of white women, and was later calibrated for African American, Hispanic, Asian and Pacific Islander women [5,6]. The most recent version uses six clinical risk factors: current age, age at first menstrual period, age at first live birth, number of first-degree relatives with breast cancer, history of previous breast biopsy and ethnicity. Several studies have assessed or updated the BCRAT model to specific populations (e.g., Asian, Oceanian) [7]. It is worth noting that this model, designed for use in the general population, is not intended to be used for women carrying inherited *BRCA1/2* mutations. The BCRAT model is used to guide physicians on breast cancer prevention strategies. As an example, the U.S. Food and Drug Administration recommended to consider chemo-prevention for women at high risk of breast cancer (i.e. a 5-year risk equal or higher than 1.66%), while the U.S. Preventive Services Task Force recommended chemo-prevention for a risk equal or higher than 3% [8]. The Canadian Task Force, as well as the Canadian Cancer Society, used a threshold of 1.66% [9,10]. Despite its implementation on the NCI's website ([bcrisktool.cancer.gov/](http://bcrisktool.cancer.gov/)), the lack of recent Canadian guidelines combined with its U.S.-centered use led to an under-use of the BCRAT model by Canadian primary care physicians. Indeed, a recent qualitative study showed that two-third of primary care physicians from two Canadian provinces (Ontario and Alberta) were unaware of the BCRAT tool [11].

The International Breast Cancer Intervention Study model (IBIS, also known as the Tyrer-Cuzick model) is also a widely used breast cancer risk prediction model, which takes into account multi-generational family history data and *BRCA1/2* mutation information. It has been developed with data

1  
2 from the International Breast Cancer Intervention Study including a cohort of daughters of patients  
3 diagnosed with the disease and has focused on the estimation of the probability of carrying a *BRCA1*  
4 or *BRCA2* mutation, as well as the estimation of breast cancer lifetime risks, through the analysis of  
5 family history, reproductive and hormonal factors, and individual characteristics [3]. The IBIS model  
6 takes into to account non-genetic risk factors (current age, age at menarche, number of live births,  
7 age at first live birth, age at menopause, height, weight, history of hyperplasia, breast density, history  
8 and age of ovarian cancer, hormone replacement therapy) together with multi-generational pedigree  
9 information and *BRCA1/2* gene mutations. The IBIS model is a hybrid model combining a  
10 segregation model for familial risk together with a classical Cox model for non-genetic risk factors.  
11 The segregation model estimates the risk due to genetic factors conditional on woman's multi-  
12 generational family history of breast and ovarian cancer, and the results of tests for *BRCA1/2* gene  
13 mutations. IBIS can be used even for women without a family history of breast cancer and without  
14 *BRCA1/2* gene mutations information. A recent study suggested that IBIS has better ability to assess  
15 breast cancer risk than BCRAT but with close performance in women not known to have mutations  
16 in *BRCA1* or *BRCA2* gene mutation [12–14].  
17  
18

19  
20  
21  
22  
23  
24  
25  
26  
27  
28  
29 With the increasing availability and affordability of genetic information, there is a growing interest to  
30 incorporate individual-level genotype data into risk prediction models for increasing their  
31 discriminatory accuracy. The integration of such information into the BCRAT model has already  
32 been performed with the addition of seven SNPs associated with breast cancer. Results showed that  
33 the performance of the predicted breast cancer's risk was slightly improved, with an area under the  
34 ROC curve (AUC) increasing from 0.607 to 0.632 [15]. This kind of clinico-genetic model has also  
35 been done with IBIS leading to an improvement in the discriminative ability [16]. Alongside these  
36 works, many genetic-based or “polygenic risk scores” (PRS) have been published for breast cancer  
37 prediction. Most of them rely upon linear combinations of the risk-conferring variant alleles weighted  
38 by their effect sizes [17–20]. The list of these risk alleles with their corresponding weights is usually  
39 obtained from large case-control genome-wide association studies (GWAS) [21]. The predictive  
40 accuracy of these PRSs compared to classical prediction models, such as the BCRAT and IBIS,  
41 should now be evaluated in various populations.  
42  
43  
44  
45  
46  
47  
48  
49  
50  
51

52 In Quebec, the Breast Cancer Screening Program consists of a mammogram every two years for  
53 women aged 50 to 69 [22]. Although this screening decreased the number of deaths from breast  
54 cancer [23], it could be stressful with non-negligible costs for the public health system. In this  
55  
56  
57  
58  
59  
60

1  
2 context, risk assessment tools could be helpful for primary care physicians to enhance screening  
3 uptake among high risk patients who are less likely to participate in organized screening. Some  
4 previous studies have assessed the accuracy of the BCRAT risk predictions in Canadian women  
5 [12,24], but they were limited to specific ethnic populations or were part of multi-countries cohorts.  
6  
7 The fact that BCRAT and IBIS have not been evaluated in the French-Canadian population, which  
8 has specific genetic patterns, as compared to the general European population [25,26], with lifestyle  
9 risk factors (e.g., nutrition) that are at the intersection between North America and Europe, prompted  
10 us to evaluate their predictive abilities in the population-based cohort CARTaGENE from Quebec.  
11  
12  
13  
14  
15

16  
17 In this study, we report the predictive accuracies of the BCRAT model, the IBIS model and  
18 polygenic risk scores to predict the occurrence of invasive breast cancers at five years in middle-aged  
19 and older French-Canadian women.  
20  
21  
22

## 23 **2 Materials and methods**

### 24 **2.1 Design and participants selection**

25  
26 The CARTaGENE population-based cohort is composed of 43,037 Quebec residents aged between  
27 40 and 69 years, recruited during two phases (2009-2010 and 2013-2014). With a rich collection of  
28 data including phenotyping and genotyping data, CARTaGENE is the largest ongoing prospective  
29 population cohort and biobank in Québec, Canada [27]. Details on recruitment and sample selection  
30 have been described previously [27].  
31  
32  
33  
34  
35  
36  
37

38 To comprehensively identify participants with an invasive breast cancer, we used two administrative  
39 health databases, the Quebec Health Insurance Board (RAMQ) and the Quebec Breast Cancer  
40 Registry (see Supplementary Methods), and an algorithm based on a previous report from the *Institut*  
41 *National de Santé Publique du Québec* (INSPQ) [28] and the Tonelli *et al.* algorithm [29]. Using the  
42 Breast Cancer Registry, we retrieved the incidence date of histologically confirmed breast cancers.  
43 Then, we selected all women having an abnormal mammography and retrieved, when available, the  
44 incidence date after the abnormal mammography from the RAMQ database for women with at least  
45 two claims in two years or one hospitalization with the appropriate International Classification of  
46 Diseases (ICD), Ninth or Tenth Revision codes (174 and C50). Adherence to mammography was not  
47 available.  
48  
49  
50  
51  
52  
53  
54  
55  
56  
57  
58  
59  
60

1  
2 For this study, we have considered the women without a breast cancer before the inclusion date from  
3 the CARTaGENE first phase of recruitment. Recruitment was unrelated to the last mammography  
4 screening. The validation of the BCRAT and IBIS models was done on the sub-cohort of 10,200  
5 women with available information for computing the BCRAT and IBIS models (hereinafter referred  
6 as clinical-based cohort (CC)). The validation of the PRS was done on the sub-cohort of 4,555  
7 women with available genotyping information (hereinafter referred as clinicogenetic-based cohort  
8 (CGC)) (Figure 1). We also compared PRS to the BCRAT and IBIS models on the CGC cohort.  
9  
10  
11  
12  
13

## 14 15 **2.2 Genetic data**

16  
17 Only a fraction of the population cohort has been genotyped (n=12,062). These participants were  
18 selected to be genotyped through various scientific projects unrelated to breast cancer [30–32].  
19 Single-nucleotide polymorphism (SNP) positions were based on build GRCh37/hg19. The detailed  
20 pipeline about quality control and imputation can be found at [www.cartagene.qc.ca/info-genetic-data](http://www.cartagene.qc.ca/info-genetic-data)  
21 and in the Supplementary Methods.  
22  
23  
24  
25  
26

## 27 28 **2.3 Outcome**

29  
30 The outcome of interest was the time of occurrence of the breast cancer from the enrollment in the  
31 cohort. Patients without breast cancer occurrence were censored at the end of the five-years study  
32 period (administrative censoring) or at death.  
33  
34  
35

## 36 37 **2.4 Predictive scores**

### 38 39 **2.4.1 Absolute risk using the BCRAT and the IBIS models**

40  
41 The BCRAT and IBIS risk scores are calculated using baseline hazard rates calculated from the  
42 marginal hazard rates, and attributable hazard function estimates obtained from the United States  
43 population data (BCRAT) and the United Kingdom/Swedish population data (IBIS). In this article,  
44 the BCRAT and IBIS absolute risks of breast cancer at five years were calculated for each woman at  
45 the inclusion date using the National Institutes of Health R package “BCRA”, version 2.1 [33] and  
46 the latest version of the “IBIS Breast Cancer Risk Evaluation Tool” ([http://www.ems-  
47 trials.org/riskevaluator/](http://www.ems-trials.org/riskevaluator/) — version 8.0b, September 2017), respectively.  
48  
49  
50  
51  
52

53  
54 All variables of the BCRAT model could be retrieved, while some variables of the IBIS model were  
55 not available and were considered missing: breast density, Ashkenazi Jewish heritage, HRT type,  
56 length of time woman intends to use HRT in the future, *BRCA1/2* genetic testing (participant and  
57  
58  
59

1 relatives), mother bilateral mastectomy, relatives' age of breast and ovary cancers, variables related  
2 to each sister, brother, grandmother, aunt, uncle and daughter. See Supplementary Methods for  
3 information about variables extraction. Missing data can be handled in both BCRAT and IBIS  
4 models.  
5  
6  
7  
8  
9

#### 10 **2.4.2 Absolute risk using PRS**

11 For estimating the absolute risk of breast cancer using PRS, we have considered the procedure  
12 implemented in the iCARE package [34]. It requires the marginal (composite) rates for breast cancer  
13 and death, obtained here from Canada Health [35,36], and the risk score distribution, obtained from  
14 the sampling at random of 10% of the individuals from the clinicogenetic-based cohort with small  
15 probability weights for the breast cancer cases. To avoid the optimism bias, we reported the results  
16 obtained using the 90% remaining (hereinafter referred as “validation CGC”).  
17  
18  
19  
20  
21  
22

23 In this study, woman's genotyping information were used for computing four different published  
24 PRS: Wacholder *et al.* [17] (10 SNPs), Mavaddat *et al.* [18] (77 SNPs), Shieh *et al.* [19] (86 SNPs)  
25 and Evans *et al.* [20] (18 SNPs). In the following, each PRS is referred to the name of the first author  
26 of the study. The SNPs and associated odds ratio can be found as Supplementary Table S1.  
27  
28  
29  
30

#### 31 **2.4.3 Absolute risk using a combination of BCRAT and PRS**

32 For estimating the absolute risk of breast cancer with a combination of BCRAT and PRS (hereinafter  
33 referred as “combined scores”), we summed the PRS and BCRAT scores (relative hazard regression  
34 scores), and used the same procedure as described in the section “Absolute risk using PRS”.  
35  
36  
37  
38  
39

40 As the hazard function obtained from the IBIS model is not an output of the software, we cannot  
41 combine the IBIS and PRS information in this work.  
42  
43

### 44 **2.5 Statistical analysis**

45 For comparing means between groups, we used a one-way ANOVA test. Relationships between  
46 categorical variables were tested using the  $\chi^2$  test. Statistical significance was considered as P-values  
47 less than 0.05. We plotted predictiveness curves (i.e., the risk quantile against the corresponding  
48 cumulative proportion of the population with risks below this quantile) with rug plots.  
49  
50  
51  
52  
53  
54  
55  
56  
57  
58  
59  
60



To assess the performance of the BCRAT, IBIS and PRS procedures for predicting invasive breast cancer risk, we reported calibration performance and discriminatory accuracy (see hereafter). We also reported the results obtained with the BCRAT and IBIS procedures in the validation CGC.

### 2.5.1 Calibration

We computed the expected-to-observed ratio (E/O), with the 95% confidence interval (95%CI), from the sum of the estimated risk divided by the number of observed cases. An E/O of 1 corresponds to perfect global calibration. For the few women with less than five years follow-up, their risk contributions were proportional to the follow-up time. We reported the intercept and slope estimates from logistic regression models (observed outcomes with the logit of the predicted probabilities as the independent variable).

We also compared the predicted and observed proportion of breast cancers in four absolute risk groups:  $<1\%$  (low risk),  $\geq 1\%$  and  $<1.66\%$  (intermediate risk),  $\geq 1.66\%$  and  $<3\%$  (average risk),  $\geq 3\%$  (high risk). The observed proportion at five-year in each risk group was calculated using a Kaplan-Meier estimator. To test the null hypothesis of a global agreement between the observed and expected values across these groups, we computed a goodness of fit test statistic and compared this latter to the critical value from the chi-squared distribution with four degrees of freedom.

### 2.5.2 Discrimination

The global discrimination was assessed by the c-statistic with an Inverse Probability of Censoring Weighting (IPCW) estimation of cumulative time-dependent ROC curve with their 95%CI [37–39]. Receiver operating curves (ROC) curves were plotted.

In the validation CGC, the c-indexes calculated with the BCRAT and IBIS scores were compared with those calculated with each PRS scores by using the independent and identically distributed-representation of the c-index estimators [39].

### 2.5.3 Sensitivity and specificity

Since the Canadian recommendation for chemoprophylaxis is a BCRAT absolute risk of breast cancer of 1.66% or higher at five-years, we calculated sensitivity and specificity using this threshold.

All statistical analyses were performed using R software, version 3.6 [40].

## 2.6 Patient and Public Involvement

1  
2 Patients or the public were not involved in the design, conduct, reporting or dissemination plans of  
3 this study. However, the CARTaGENE cohort received an ethical approval from thirteen ethics  
4 committees before its development and implementation. Each ethics committee includes participants  
5 and public representatives, which had the opportunity to ask questions and make recommendations.  
6  
7  
8  
9

### 10 **3 Results**

11  
12 Overall, 10,200 women were included for validating the BCRAT and IBIS scores and 4,555 women  
13 with available genotype data were selected for the validation of the PRS scores and combined scores  
14 (Figure 1). The median age was 53.1 years [quartile: 47.8-60.4] and 53.1 years [quartile 48-60.1] for  
15 the participants of CC and CGC, respectively. The median follow-up time was of 5 years in both  
16 cohorts. We observed 131 (1.28%) and 58 (1.27%) women developing a breast cancer for the CC and  
17 CGC, respectively. In total, there was 42 (0.41%) and 11 (0.24%) deaths during the five-year follow-  
18 up, for the CC and CGC, respectively. The clinical characteristics of the two cohorts can be found in  
19 the Supplementary Table S2.  
20  
21  
22  
23  
24  
25  
26

#### 27 **3.1 Breast cancer risk prediction models (BCRAT and IBIS) evaluated in the clinical-based** 28 **validation cohort**

29  
30  
31 Using the BCRAT model, 19.8% of women were classified into the group with an absolute risk equal  
32 or higher than 1.66% (Figure 2A). There was a global agreement between the predicted and observed  
33 number of breast cancer incident cases, with an E/O of 1.01 [0.85-1.19]. However, the goodness of fit  
34 test for the four risk groups showed a significant difference between observed and expected values  
35 ( $p=0.0439$ ). Among the four risk groups, the E/O was significantly different from one for the average  
36 risk group (E/O: 1.51% [1.01-2.28]). There was also a slight overestimation in the high risk group  
37 (Figure 2B). This finding was in agreement with the estimate values obtained from the calibration  
38 plot with an intercept lower than zero (intercept: -1.9 [-3.4 - -0.4]) and a slope smaller than 1 (slope:  
39 0.6 [0.2 - 0.9]). The BCRAT model had a modest discriminatory accuracy, with a c-index of 58.63  
40 [54.05-63.21] (Figure 2C). The sensitivity and specificity for the 1.66% threshold were 23.7% [16.7-  
41 31.9] and 80.3% [79.5-81], respectively.  
42  
43  
44  
45  
46  
47  
48  
49  
50

51 Using the IBIS model, 18.0% of women were classified into the group with an absolute risk higher or  
52 equal to 1.66% (Figure 2A). There was also a global agreement between the predicted and observed  
53 number of breast cancer incident cases, with an E/O of 1.02 [0.86-1.21]. However, the goodness of fit  
54 test for the four risk groups showed a significant difference between observed and expected values  
55  
56  
57  
58  
59  
60



( $p=0.0056$ ). The IBIS risk prediction score overestimated the number of cases in the low risk group (E/O: 2.38 [1.35-4.19]) and underestimated the number of cases in the intermediate risk group (E/O: 0.78 [0.63-0.97]), while the E/O were non-significant in the two higher risk groups (Figure 2B). The intercept and slope were not significantly different from zero and one, respectively (0.4 [-1.3 – 2] and 1.1 [0.7 – 1.5], respectively). The IBIS model produced a slightly better discriminatory accuracy than BCRAT, with a c-index of 63.42 [59.35-67.49] ( $p=0.013$ ) (Figure 2C). The sensitivity and specificity for the 1.66% threshold were 26.7% [19.4-35.2] and 82.1% [81.3-82.8], respectively.

### **3.2 Breast cancer risk prediction models (BCRAT, IBIS, PRS and combined scores) evaluated in the clinicogenetic-based validation cohort**

Results obtained in the validation CGC cohort that included participants with all the genetic and clinical information are reported in Tables 1 and 2.

In this sub-cohort, BCRAT and IBIS models classified 21% and 18.5% of women into the two higher risk groups, respectively. There was a global agreement between the predicted and observed number of breast cancer cases, with an expected/observed ratio of 0.94 [0.73-1.22] and 0.94 [0.73-1.22], respectively. The discriminatory accuracy of the BCRAT and IBIS models were of 59.13 [52.96-65.29] and 59.63 [53.26-66], respectively.

Using the Mavaddat, Shieh, Evans and Wacholder PRS scores, 18%, 19%, 15% and 13.5% of women were classified into the group with an absolute risk equal or higher than 1.66%, respectively (Supplementary Figure S1). All the PRS scores had an E/O around 0.82, with a 95%CI including one (Table 1). None of the goodness of fit test showed a significant departure from the null hypothesis (Figure 3). The intercepts and slopes for the calibration plot were not significantly different from zero and one, respectively (Table 1).

The PRS' c-indexes were all slightly higher than those obtained from the BCRAT and IBIS scores, Wacholder score leading to the highest c-index (64.27 [58.09-70.44]). However, none of the c-indexes was statistically different from the ones computed with the BCRAT and IBIS models (Table 1). The discrimination for women at higher risk was better for the Shieh, Evans and Mavaddat PRS scores compared to BCRAT and IBIS scores (down-left corner of the ROC curves, Supplementary Figure S2). Using a 1.66% threshold, all PRS scores increased both the sensitivity and the specificity as compared to the BCRAT and IBIS risk prediction score (Table 1).

1  
2 All the combined models (BCRAT + PRS) had an E/O around 0.84, with all 95%CI including one  
3 (Table 2). The goodness of fit test using the four risk groups showed a significant departure from the  
4 null hypothesis for the Wacholder and Evans combined models ( $p=0.0478$  and  $p=0.0471$ ,  
5 respectively) (Figure 4). While the Mavaddat and Shieh combined models underestimated the  
6 number of cases in the low risk group (E/O: 0.62 [0.41-0.93] and 0.63 [0.42-0.96], respectively), the  
7 Evans and Wacholder combined models underestimated the number of cases in the intermediate risk  
8 group (E/O: 0.58 [0.39-0.85] and 0.64 [0.43-0.95], respectively). Other groups' E/O were not  
9 different from one. The Shieh combined model had an intercept and slope significantly different from  
10 zero and one, respectively (Table 2).  
11  
12  
13  
14  
15  
16  
17

18 The combined models' c-indexes were all slightly higher than the BCRAT and IBIS scores, but none  
19 of them were statistically different from the ones computed with the BCRAT and IBIS models (Table  
20 1). The discrimination for women at higher risk was better for the Shieh and Mavaddat combined  
21 scores (down-left corner of the ROC curves, Supplementary Figure S2). Using a 1.66% threshold,  
22 only the Evans combined model increased both the sensitivity and the specificity as compared to the  
23 BCRAT and IBIS risk prediction score (Table 2).  
24  
25  
26  
27  
28  
29

#### 30 **4 Discussion**

31  
32 In this work, we reported the predictive performance of BCRAT, IBIS and four polygenic risk scores  
33 for predicting breast cancer occurrence within five years in a French-Canadian population. Results  
34 show that the BCRAT and IBIS models are globally well calibrated. However, when focusing on  
35 predicted risk subgroups, the BCRAT model overestimates the number of cases in the average risk  
36 group (1.66%-3% risk) while the IBIS model was miscalibrated in the low and intermediate risk  
37 groups (below 1.66% risk). In our study, IBIS produced slightly better discrimination than BCRAT.  
38  
39 As compared to the clinical-based models, the genetic prediction models (PRS) did not provide a  
40 significant improvement of the discriminative capacity. Adding PRS to the BCRAT scores did not  
41 significantly increase the predictive power of BCRAT.  
42  
43  
44  
45  
46  
47  
48

49 Despite an overall good calibration of the BCRAT model, the analysis of the four groups of risk  
50 shows a significant difference between expected and observed cases with an over-prediction in  
51 women with a risk equal or higher than 1.66%. This finding is in accordance with previous studies  
52 [41–43]. Opposite results have also been reported in a recent large study with pooled data from two  
53 cohorts of women where the BCRAT model underestimated the risk for values between 1.7% and  
54 3.4% [12]. However, in this latter study, the prediction horizon was at 10 years, eligible women were  
55  
56  
57  
58  
59

1  
2 aged between 20 and 70 years at the enrollment and recruited since 1991, while our population was  
3 aged between 40 and 70 years and enrolled since 2009. The overestimation of the BCRAT risk  
4 prediction model for women with a risk higher than 1.66% cannot be explained by differences in age-  
5 standardized incidence rates since, based on information retrieved from national cancer databases  
6 [35,44,45], the incidence rates are comparable between the United States and Canada (250.4 [95%CI  
7 209.0-298.3] cases per 100,000 per year for Canada and 236.8 [95%CI 235.5-238.1] for US). The  
8 IBIS model, the PRS models and the clinico-genetic model (BCRAT+PRS) had also an overall good  
9 calibration. However, the IBIS over and underestimated the risk in the low and intermediate groups,  
10 respectively. This is not the case for the PRS models but this result should be cautiously interpreted  
11 in light of the reduced number of breast cancers in the genetic cohort.  
12  
13  
14  
15  
16  
17  
18  
19

20 The discriminatory accuracy of the BCRAT risk prediction model is modest in our population  
21 (58.6%) but is in accordance to the meta-analysis of Wang *et al.* [7] that reported a pooled AUC  
22 close to our c-index (0.60 [0.58-0.62]). The IBIS model produced a better discrimination estimate  
23 (63.4%) than BCRAT. Since we did not collect multi-generational pedigree or *BRCAl/2* gene  
24 mutations data in our cohort, the gain in discrimination for the IBIS model as compared to BCRAT  
25 model may be linked to the non-genetic risk factors. HRT use and the menopausal status, that are risk  
26 factors for the IBIS model, are significantly associated in our series with the outcome ( $p < 0.05$ , results  
27 not shown) and may explain the gain in discriminative accuracy. It emphasizes that the inclusion of  
28 new modifiable risk factors can increase discriminatory accuracy of predictive models. The PRS and  
29 the clinico-genetic model did not provide a significantly better discrimination. This is not surprising  
30 since when combining SNPs the gains in prediction are usually small [15]. Moreover, these non-  
31 significant results should also be interpreted in light of the modest size of our cohort having genetic  
32 information.  
33  
34  
35  
36  
37  
38  
39  
40  
41  
42  
43

44 Some strengths of the present study should be highlighted. Firstly, this validation study relies on the  
45 CARTaGENE cohort, which is representative of the French-Canadian urban population of middle-  
46 aged and older adults. Moreover, the linkage with administrative health databases and the Quebec  
47 Breast Cancer Registry improved the outcome quality and accuracy, and made possible to use  
48 variables usually difficult to obtain such as the history of breast biopsy or atypical hyperplasia.  
49 Secondly and to the best of our knowledge, this study is the first to evaluate the breast cancer risk  
50 assessment tools in a French-Canadian population for predicting breast cancer at five years.  
51  
52  
53  
54  
55  
56  
57  
58  
59  
60

1  
2 This study has nevertheless some limitations. Firstly, our findings may not apply to younger women  
3 under forty years old. Secondly, we have limited our study to BCRAT and IBIS risk prediction  
4 models. The main reason was that both models were well documented and implemented. The  
5 BCRAT model is used for prevention purpose with chemo-prophylaxis in the US [46,47] and its risk  
6 score is composed of clinical variables, easy to obtain in real clinical practice. The IBIS model is also  
7 implemented and can be used even with missing data such as multi-generational pedigree and  
8 *BRCAl/2* gene mutations data. Thirdly, since the genotyping information was not available for all the  
9 cohort, the PRS, BCRAT and IBIS models had to be evaluated on different sub-cohorts. The  
10 ethnicity differences between the two sub-cohorts could be explained by the divergent ancestry step  
11 of the quality control of genotype data. The highest breast cancer risk among genotyped women  
12 (higher age at first live birth and more relatives with breast cancer) could not be explained by the  
13 women preferentially genotyped, as they were selected for studies unrelated with breast cancers [30–  
14 32]. Even though these two sub-cohorts were similar, it would be useful to collect all genotype  
15 information for the entire cohort to validate the PRS results.  
16  
17  
18  
19  
20  
21  
22  
23  
24  
25

#### 26 27 **4.1 Conclusion**

28  
29 BCRAT and IBIS produced overall good calibration in our French-Canadian cohort but with  
30 moderate performance in terms of discriminative ability. These results are in accordance to previous  
31 validation studies. IBIS had the better discriminatory accuracy. PRS models did not significantly  
32 improve the discrimination. Despite the modest discriminatory power of BCRAT and IBIS, these  
33 tools can be of interest for primary care physicians for delivering a personalized message to their  
34 high risk patients, regarding screening and lifestyle counseling.  
35  
36  
37  
38  
39  
40

## 41 **5 Figures**

### 42 **Figure 1 Flow-chart**

43  
44  
45  
46 **Figure 2 Absolute risk distribution and performance of the BCRAT and IBIS models in the**  
47 **Clinical-based cohort.** (A) Distribution of models' predictions as a function of cumulative  
48 percentage of women. Rug plot on the y-axis. (B) Calibration according to the models' predictions  
49 groups. P values were computed using a goodness of fit test statistic compared to the critical value  
50 from the chi-squared distribution. E/O: expected-to-observed cases. (C) Discrimination power of the  
51 models according to sensitivity and specificity. C-index was calculated using the Inverse Probability  
52 of Censoring Weighting (IPCW) estimation of cumulative time-dependent ROC curve.  
53  
54  
55  
56  
57  
58  
59  
60

Figure 3 **Calibration according to BCRAT, IBIS and PRS scores' predictions groups.** PRS: polygenic risk score. E/O: expected-to-observed cases. Results from the clinicogenetic-based cohort. P values were computed using a goodness of fit test statistic compared to the critical value from the chi-squared distribution. Each PRS models name referred to the first author of the study from which the PRS were derived.

Figure 4 **Calibration according to BCRAT, IBIS and combined models' predictions groups.** PRS: polygenic risk score. E/O: expected-to-observed cases. Results from the clinicogenetic-based cohort. P values were computed using a goodness of fit test statistic compared to the critical value from the chi-squared distribution. Each PRS models name referred to the first author of the study from which the PRS were derived.

## 6 Tables

**Table 1: Comparison of BCRAT, IBIS and PRS scores using the clinicogenetic-based cohort.**

|                                           | <b>BCRAT model /<br/>IBIS model</b> | <b>Mavaddat</b>   | <b>Shieh</b>            | <b>Evans</b>           | <b>Wacholder</b>        |
|-------------------------------------------|-------------------------------------|-------------------|-------------------------|------------------------|-------------------------|
| <b>E/O</b>                                | 0.94 [0.73-1.22]                    | 0.83 [0.64-1.08]  | 0.81 [0.63-1.05]        | 0.82 [0.63-1.06]       | 0.81 [0.62-1.04]        |
|                                           | 0.94 [0.73-1.22]                    |                   |                         |                        |                         |
| <b>Goodness of fit</b>                    | p=0.0415                            | p=0.0984          | p=0.1009                | p=0.1992               | p=0.2770                |
|                                           | p=268                               |                   |                         |                        |                         |
| <b>Intercept</b>                          | -2 [-4.4 - 0.2]                     | -0.3 [-2.4 - 1.8] | -1 [-2.5 - 0.5]         | 1 [-1.6 - 3.6]         | 0.9 [-1.8 - 3.5]        |
|                                           | -0.8 [-3.4 - 1.8]                   |                   |                         |                        |                         |
| <b>Slope</b>                              | 0.5 [0 - 1]                         | 0.9 [0.4 - 1.4]   | 0.7 [0.4 - 1.1]         | 1.2 [0.6 - 1.8]        | 1.1 [0.5 - 1.7]         |
|                                           | 0.8 [0.2 - 1.4]                     |                   |                         |                        |                         |
| <b>C-index</b>                            | 59.13 [52.96-<br>65.29]             | 60.77 [53-68.53]  | 62.56 [54.54-<br>70.59] | 63.4 [56.65-<br>70.16] | 64.27 [58.09-<br>70.44] |
|                                           | 59.63 [53.26-66]                    |                   |                         |                        |                         |
| <b>C-indexes<br/>comparison<br/>with:</b> |                                     |                   |                         |                        |                         |
| BCRAT model                               | -                                   | p=0.72            | p=0.46                  | p=0.23                 | p=0.18                  |

|                      |                   |                 |                   |                   |                   |
|----------------------|-------------------|-----------------|-------------------|-------------------|-------------------|
| IBIS model           | -                 | p=0.81          | p=0.57            | p=0.34            | p=0.26            |
| <b>Sensitivity *</b> | 20.7% [11.2-33.4] | 31% [19.5-44.5] | 39.7% [27-53.4]   | 34.5% [22.5-48.1] | 25.9% [15.3-39]   |
|                      | 24.1% [13.9-37.2] |                 |                   |                   |                   |
| <b>Specificity *</b> | 79% [77.7-80.3]   | 82.2% [81-83.4] | 81.3% [80.1-82.5] | 85.4% [84.2-86.4] | 86.7% [85.6-87.7] |
|                      | 81.6% [80.4-82.8] |                 |                   |                   |                   |

BCRAT: Breast Cancer Risk Assessment Tool; E/O: expected-to-observed ratio; IBIS: International Breast Cancer Intervention Study risk evaluation tool; NRI: Net Reclassification Index

Clinicogenetic-based cohort: validation of the PRS models and comparison with the BCRAT and IBIS models, genotyped women with all SNPs available. 10% of the cohort was used to obtain the risk score distribution while the remained 90% was used for computing the results.

95% confidence intervals in square brackets

\* 1.66% threshold

**Table 2: Comparison of BCRAT, IBIS and combined scores using the clinicogenetic-based cohort.**

|                                       | <b>BCRAT model /<br/>IBIS model</b>     | <b>Combined<br/>Mavaddat</b> | <b>Combined<br/>Shieh</b> | <b>Combined<br/>Evans</b> | <b>Combined<br/>Wacholder</b> |
|---------------------------------------|-----------------------------------------|------------------------------|---------------------------|---------------------------|-------------------------------|
| <b>E/O</b>                            | 0.94 [0.73-1.22]<br>0.94 [0.73-1.22]    | 0.86 [0.66-1.11]             | 0.83 [0.64-1.07]          | 0.83 [0.64-1.07]          | 0.82 [0.64-1.06]              |
| <b>Goodness of fit</b>                | p=0.0415<br>p=0.268                     | p=0.161                      | p=0.13                    | p=0.047                   | p=0.0475                      |
| <b>Intercept</b>                      | -2 [-4.4 - 0.2]<br>-0.8 [-3.4 - 1.8]    | - 1.5 [-3.3 - 0.1]           | -1.6 [-3 - -0.3]          | -1.2 [-3.1 - 0.6]         | -1.3 [-3.2 - 0.5]             |
| <b>Slope</b>                          | 0.5 [0 - 1]<br>0.8 [0.2 - 1.4]          | 0.6 [0.2 - 1]                | 0.6 [0.3 - 0.9]           | 0.7 [0.3 - 1.1]           | 0.7 [0.2 - 1.1]               |
| <b>C-index</b>                        | 59.13 [52.96-65.29]<br>59.63 [53.26-66] | 61.42 [54.05-68.78]          | 63.35 [55.58-71.12]       | 62.69 [55.88-69.50]       | 63.58 [57.46-69.69]           |
| <b>C-indexes<br/>comparison with:</b> |                                         |                              |                           |                           |                               |
| BCRAT model                           | -                                       | p=0.50                       | p=0.28                    | p=0.12                    | p=0.059                       |

| IBIS model           | -                 | p=0.66            | p=0.42            | p=0.38            | p=0.22            |
|----------------------|-------------------|-------------------|-------------------|-------------------|-------------------|
| <b>Sensitivity *</b> | 20.7% [11.2-33.4] | 36.2% [24-49.9]   | 37.9% [25.5-51.6] | 25.9% [15.3-39]   | 22.4% [12.5-35.3] |
|                      | 24.1% [13.9-37.2] |                   |                   |                   |                   |
| <b>Specificity *</b> | 79% [77.7-80.3]   | 80.5% [79.2-81.7] | 81.5% [80.2-82.7] | 82.1% [80.9-83.3] | 83.8% [82.6-84.9] |
|                      | 81.6% [80.4-82.8] |                   |                   |                   |                   |

BCRAT: Breast Cancer Risk Assessment Tool; E/O: expected-to-observed ratio; IBIS: International Breast Cancer Intervention Study risk evaluation tool; NRI: Net Reclassification Index

Combined scores: PRS scores combined with the BCRAT scores.

Clinicogenetic-based cohort: validation of the PRS models and comparison with the BCRAT and IBIS models, genotyped women with all SNPs available. 10% of the cohort was used to obtain the risk score distribution while the remained 90% was used for computing the results.

95% confidence intervals in square brackets

\* 1.66% threshold

## 7 References

- Canadian Cancer Statistics Advisory Committee. Canadian Cancer Statistics 2019. *Toronto, ON: Canadian Cancer Society* Published Online First: September 2019. [cancer.ca/Canadian-Cancer-Statistics-2019-EN](http://cancer.ca/Canadian-Cancer-Statistics-2019-EN) (accessed 13 Nov 2019).
- Gail MH, Brinton LA, Byar DP, *et al.* Projecting Individualized Probabilities of Developing Breast Cancer for White Females Who Are Being Examined Annually. *JNCI Journal of the National Cancer Institute* 1989;**81**:1879–86. doi:10/djr43s
- Tyrer J, Duffy SW, Cuzick J. A breast cancer prediction model incorporating familial and personal risk factors. *Statist Med* 2004;**23**:1111–30. doi:10.1002/sim.1668
- Costantino JP, Gail MH, Pee D, *et al.* Validation studies for models projecting the risk of invasive and total breast cancer incidence. *J Natl Cancer Inst* 1999;**91**:1541–8. doi:10/ckg9vc
- Gail MH, Costantino JP, Pee D, *et al.* Projecting Individualized Absolute Invasive Breast Cancer Risk in African American Women. *J Natl Cancer Inst* 2007;**99**:1782–92. doi:10/btbj9
- Matsuno RK, Costantino JP, Ziegler RG, *et al.* Projecting Individualized Absolute Invasive Breast Cancer Risk in Asian and Pacific Islander American Women. *J Natl Cancer Inst* 2011;**103**:951–61. doi:10/dkmv6x
- Wang X, Huang Y, Li L, *et al.* Assessment of performance of the Gail model for predicting breast cancer risk: a systematic review and meta-analysis with trial sequential analysis. *Breast Cancer Res* 2018;**20**. doi:10/gc83rw



- 1
  - 2
  - 3
  - 4
  - 5
  - 6
  - 7
  - 8 Farkas A, Vanderberg R, Merriam S, *et al.* Breast Cancer Chemoprevention: A Practical Guide for the Primary Care Provider. *Journal of Women's Health* 2020;**29**:46–56. doi:10.1089/jwh.2018.7643
  - 9
  - 10
  - 11
  - 12
  - 13
  - 14
  - 15
  - 16
  - 17
  - 18
  - 19
  - 20
  - 21
  - 22
  - 23
  - 24
  - 25
  - 26
  - 27
  - 28
  - 29
  - 30
  - 31
  - 32
  - 33
  - 34
  - 35
  - 36
  - 37
  - 38
  - 39
  - 40
  - 41
  - 42
  - 43
  - 44
  - 45
  - 46
  - 47
  - 48
  - 49
  - 50
  - 51
  - 52
  - 53
  - 54
  - 55
  - 56
  - 57
  - 58
  - 59
  - 60
- 9 Levine M, Moutquin J-M, Walton R, *et al.* Chemoprevention of breast cancer: A joint guideline from the Canadian Task Force on Preventive Health Care and the Canadian Breast Cancer Initiative's Steering Committee on Clinical Practice Guidelines for the Care and Treatment of Breast Cancer. *CMAJ* 2001;**164**:1681–90.
- 10 Canadian Cancer Society. Reducing your risk for breast cancer. [www.cancer.ca](http://www.cancer.ca). <http://www.cancer.ca/en/cancer-information/cancer-type/breast/risks/reducing-your-risk/?region=qc> (accessed 28 Nov 2019).
- 11 Voruganti RT, O'Brien MA, Straus SE, *et al.* Primary care physicians' perspectives on computer-based health risk assessment tools for chronic diseases: a mixed methods study. *BMJ Health & Care Informatics* 2015;**22**:333–9. doi:10/ggt2c8
- 12 Terry MB, Liao Y, Whittemore AS, *et al.* 10-year performance of four models of breast cancer risk: a validation study. *The Lancet Oncology* 2019;**20**:504–17. doi:10/ggt2dp
- 13 Gail MH. Performance of BCRAT in high-risk patients with breast cancer. *The Lancet Oncology* 2019;**20**:e285. doi:10.1016/S1470-2045(19)30301-8
- 14 Terry MB, Liao Y, Hopper JL, *et al.* Performance of BCRAT in high-risk patients with breast cancer – Authors' reply. *The Lancet Oncology* 2019;**20**:e286. doi:10.1016/S1470-2045(19)30311-0
- 15 Gail MH. Discriminatory Accuracy From Single-Nucleotide Polymorphisms in Models to Predict Breast Cancer Risk. *J Natl Cancer Inst* 2008;**100**:1037–41. doi:10/ff2x2r
- 16 Dite GS, MacInnis RJ, Bickerstaffe A, *et al.* Breast Cancer Risk Prediction Using Clinical Models and 77 Independent Risk-Associated SNPs for Women Aged Under 50 Years: Australian Breast Cancer Family Registry. *Cancer Epidemiol Biomarkers Prev* 2016;**25**:359–65. doi:10.1158/1055-9965.EPI-15-0838
- 17 Wacholder S, Hartge P, Prentice R, *et al.* Performance of Common Genetic Variants in Breast-Cancer Risk Models. *N Engl J Med* 2010;**362**:986–93. doi:10/fn7zxw
- 18 Mavaddat N, Pharoah PDP, Michailidou K, *et al.* Prediction of Breast Cancer Risk Based on Profiling With Common Genetic Variants. *J Natl Cancer Inst* 2015;**107**. doi:10/f3nv95
- 19 Shieh Y, Hu D, Ma L, *et al.* Breast cancer risk prediction using a clinical risk model and polygenic risk score. *Breast Cancer Res Treat* 2016;**159**:513–25. doi:10/ggt2dm
- 20 Evans DG, Brentnall A, Byers H, *et al.* The impact of a panel of 18 SNPs on breast cancer risk in women attending a UK familial screening clinic: a case-control study. *J Med Genet* 2017;**54**:111–3. doi:10/f9nd2w
- 21 MacArthur J, Bowler E, Cerezo M, *et al.* The new NHGRI-EBI Catalog of published genome-wide association studies (GWAS Catalog). *Nucleic Acids Research* 2017;**45**:D896. doi:10/f9v7cp



- 1  
2 22 Gouvernement du Québec. Québec Breast Cancer Screening Program.  
3 2018. [https://www.quebec.ca/en/health/advice-and-prevention/screening-and-carrier-testing-](https://www.quebec.ca/en/health/advice-and-prevention/screening-and-carrier-testing-offer/quebec-breast-cancer-screening-program/)  
4 [offer/quebec-breast-cancer-screening-program/](https://www.quebec.ca/en/health/advice-and-prevention/screening-and-carrier-testing-offer/quebec-breast-cancer-screening-program/) (accessed 9 Mar 2020).  
5
- 6 23 Shields M, Wilkins K. An update on mammography use in Canada. *Health Rep* 2009;**20**:7–19.  
7
- 8 24 Bernatsky S, Clarke A, Ramsey-Goldman R, *et al.* Hormonal exposures and breast cancer in a  
9 sample of women with systemic lupus erythematosus. *Rheumatology (Oxford)* 2004;**43**:1178–81.  
10 doi:10/bq2cx6  
11
- 12 25 Casals F, Hodgkinson A, Hussin J, *et al.* Whole-Exome Sequencing Reveals a Rapid Change in  
13 the Frequency of Rare Functional Variants in a Founding Population of Humans. *PLoS Genet*  
14 2013;**9**:e1003815. doi:10.1371/journal.pgen.1003815  
15
- 16 26 Scriver CR. Human Genetics: Lessons from Quebec Population. *Annu Rev Genom Hum Genet*  
17 2001;**2**:69–101. doi:10.1146/annurev.genom.2.1.69  
18
- 19 27 Awadalla P, Boileau C, Payette Y, *et al.* Cohort profile of the CARTaGENE study: Quebec’s  
20 population-based biobank for public health and personalized genomics. *International Journal of*  
21 *Epidemiology* 2013;**42**:1285–99. doi:10.1093/ije/dys160  
22
- 23 28 Thériège I, Institut national de santé publique du Québec, Direction systèmes de soins et  
24 services. *Validation de stratégies pour obtenir le taux de détection du cancer, la valeur*  
25 *prédictive positive, la proportion des cancers in situ, la proportion des cancers infiltrants de*  
26 *petite taille et la proportion des cancers infiltrants sans envahissement ganglionnaire dans le*  
27 *cadre des données fournies par le programme québécois de dépistage du cancer du sein*  
28 *(PQDCS)*. Montréal: : Direction des systèmes de soins et services, Institut national de santé  
29 publique 2003.  
30  
31  
32  
33
- 34 29 Tonelli M, Wiebe N, Fortin M, *et al.* Methods for identifying 30 chronic conditions: application  
35 to administrative data. *BMC Medical Informatics and Decision Making* 2015;**15**:31.  
36 doi:10/f698hd  
37
- 38 30 Akçimen F, Ross JP, Sarayloo F, *et al.* Genetic and epidemiological characterization of restless  
39 legs syndrome in Québec. *Sleep* 2019;**43**. doi:10.1093/sleep/zsz265  
40
- 41 31 Hodgkinson A, Idaghdour Y, Gbeha E, *et al.* High-Resolution Genomic Analysis of Human  
42 Mitochondrial RNA Sequence Variation. *Science* 2014;**344**:413–5. doi:10/ggt2b8  
43
- 44 32 Hussin JG, Hodgkinson A, Idaghdour Y, *et al.* Recombination affects accumulation of damaging  
45 and disease-associated mutations in human populations. *Nat Genet* 2015;**47**:400–4. doi:10/ggrr3s  
46
- 47 33 Zhang F. *BCRA: breast cancer risk assessment*. 2018. [https://CRAN.R-](https://CRAN.R-project.org/package=BCRA)  
48 [project.org/package=BCRA](https://CRAN.R-project.org/package=BCRA)  
49
- 50 34 Choudhury PP, Maas P, Wilcox A, *et al.* iCARE: An R package to build, validate and apply  
51 absolute risk models. *PLOS ONE* 2020;**15**:e0228198. doi:10/ggt2ch  
52
- 53 35 Statistics Canada. Table 13-10-0111-01 Number and rates of new cases of primary cancer, by  
54 cancer type, age group and sex. doi.org/10.25318/1310011101-eng (accessed 10 Nov 2019).  
55  
56  
57  
58  
59

- 1  
2 36 Statistics Canada. Table 13-10-0392-01 Deaths and age-specific mortality rates, by selected  
3 grouped causes. <https://doi.org/10.25318/1310039201-eng> (accessed 10 Nov 2019).  
4
- 5 37 Uno H, Cai T, Tian L, *et al*. Evaluating Prediction Rules for t-Year Survivors with Censored  
6 Regression Models. *Journal of the American Statistical Association* 2007;**102**:527–37.  
7 doi:10.1198/016214507000000149  
8
- 9 38 Blanche P, Latouche A, Viallon V. Time-dependent AUC with right-censored data: a survey  
10 study. *arXiv:12106805 [statME]* Published Online First: 25 October  
11 2012.<http://arxiv.org/abs/1210.6805> (accessed 26 Sep 2017).  
12  
13
- 14 39 Blanche P, Dartigues J-F, Jacqmin-Gadda H. Estimating and comparing time-dependent areas  
15 under receiver operating characteristic curves for censored event times with competing risks.  
16 *Statist Med* 2013;**32**:5381–97. doi:10.1002/sim.5958  
17
- 18 40 R Core Team. *R: A Language and Environment for Statistical Computing*. Vienna, Austria: R  
19 Foundation for Statistical Computing 2020. <https://www.R-project.org/>  
20
- 21 41 Schonberg MA, Li VW, Eliassen AH, *et al*. Performance of the Breast Cancer Risk Assessment  
22 Tool Among Women Age 75 Years and Older. *JNCIJ* 2016;**108**:d1v348. doi:10/ggt2db  
23  
24
- 25 42 Nickson C, Procopio P, Velentzis LS, *et al*. Prospective validation of the NCI Breast Cancer Risk  
26 Assessment Tool (Gail Model) on 40,000 Australian women. *Breast Cancer Res* 2018;**20**:155.  
27 doi:10/ggt2dc  
28
- 29 43 Glynn RJ, Colditz GA, Tamimi RM, *et al*. Comparison of Questionnaire-Based Breast Cancer  
30 Prediction Models in the Nurses' Health Study. *Cancer Epidemiol Biomarkers Prev*  
31 2019;**28**:1187–94. doi:10/ggt2c4  
32  
33
- 34 44 Statistics Canada. Table 17-10-0005-01 Population estimates on July 1st, by age and sex.  
35 doi:doi.org/10.25318/1710000501-eng  
36
- 37 45 U.S. Cancer Statistics Working Group. U.S. Cancer Statistics Data Visualizations Tool, based on  
38 November 2018 submission data (1999–2016): U.S. Department of Health and Human Services,  
39 Centers for Disease Control and Prevention and National Cancer Institute.  
40 2019.[www.cdc.gov/cancer/dataviz](http://www.cdc.gov/cancer/dataviz) (accessed 9 Oct 2019).  
41  
42
- 43 46 Moyer VA. Medications for Risk Reduction of Primary Breast Cancer in Women: U.S.  
44 Preventive Services Task Force Recommendation Statement. *Ann Intern Med* Published Online  
45 First: 24 September 2013. doi:10/ggt2cx  
46
- 47 47 Louro J, Posso M, Hilton Boon M, *et al*. A systematic review and quality assessment of  
48 individualised breast cancer risk prediction models. *Br J Cancer* 2019;**121**:76–85. doi:10/ggt2c3  
49  
50

## 51 **8 Funding**

52  
53 This research received no specific grant from any funding agency in the public, commercial or not-  
54 for-profit sectors.  
55  
56  
57  
58  
59  
60

## 9 Competing Interests

The authors declare that the research was conducted in the absence of any commercial or financial relationships that could be construed as a potential conflict of interest.

## 10 Author Contributions

RJ: conceptualization, data curation, formal analysis, investigation, methodology, visualization, writing - original draft, writing - review & editing. YP: data curation, software, writing - review & editing. TM: data curation, software. CL: resources. NN: conceptualization, resources, writing - review & editing. PB: conceptualization, formal analysis, methodology, project administration, supervision, validation, writing - review & editing. All authors read and approved the final manuscript.

## 11 Data Availability Statement

The data that support the findings of this study are available from CARTaGENE but restrictions apply to the availability of these data. Data are however available directly from CARTaGENE (<http://cartagene.qc.ca>; [access@cartagene.qc.ca](mailto:access@cartagene.qc.ca); +1 514-345-2156).

## 12 Ethics approval and consent to participate

This project has been approved by the Research Ethics Board of the CHU Sainte-Justine under the reference 2020-2427. In addition, CARTaGENE has obtained ethics approval by the CHU Sainte-Justine under the reference: MP-21-2011-345, 3297. The latest annual ethics renewal was granted on September 13, 2019. This latter approval implies that all participants have given their consent ([cartagene.qc.ca/sites/default/files/documents/consent/brochure\\_en\\_0505\\_0.pdf](http://cartagene.qc.ca/sites/default/files/documents/consent/brochure_en_0505_0.pdf)). Consent was obtained from all the participants.

## 13 Acknowledgments

We would like to thank all the CARTaGENE participants for their generous investments in health research. We would also like to thank the RAMQ and the Commission d'accès à l'information (CAI) for their support in obtaining the data.

## 14 Supplementary Material

### Supplementary Methods

1  
2 **Supplementary Table S1: SNPs used for each extended model and the associated gene and odds**  
3 **ratio.**  
4

5  
6 **Supplementary Table S2: Characteristics comparison of the women from the Clinical-based**  
7 **and the clinicogenetic-based cohorts.**  
8  
9

10  
11 **Supplementary Figure S1: Distribution of BCRAT, IBIS, PRS and combined scores predictions**  
12 **as a function of cumulative percentage of women.** Results from the clinicogenetic-based cohort.  
13  
14

15 **Supplementary Figure S2: Discrimination power of BCRAT, IBIS, PRS scores and combined**  
16 **models according to sensitivity and specificity.** Results from the clinicogenetic-based cohort. C-  
17 indexes were calculated using the Inverse Probability of Censoring Weighting (IPCW) estimation of  
18 cumulative time-dependent ROC curve. Each PRS models name referred to the first author of the  
19 study from which the PRS were derived.  
20  
21  
22  
23  
24  
25  
26  
27  
28  
29  
30  
31  
32  
33  
34  
35  
36  
37  
38  
39  
40  
41  
42  
43  
44  
45  
46  
47  
48  
49  
50  
51  
52  
53  
54  
55  
56  
57  
58  
59  
60

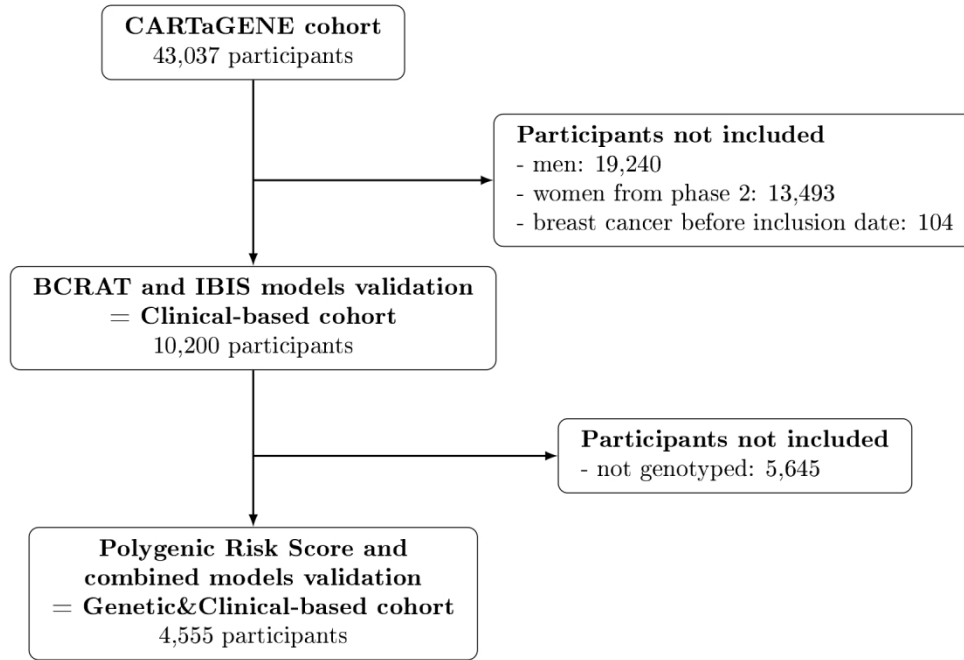

Flow-Chart

145x96mm (300 x 300 DPI)

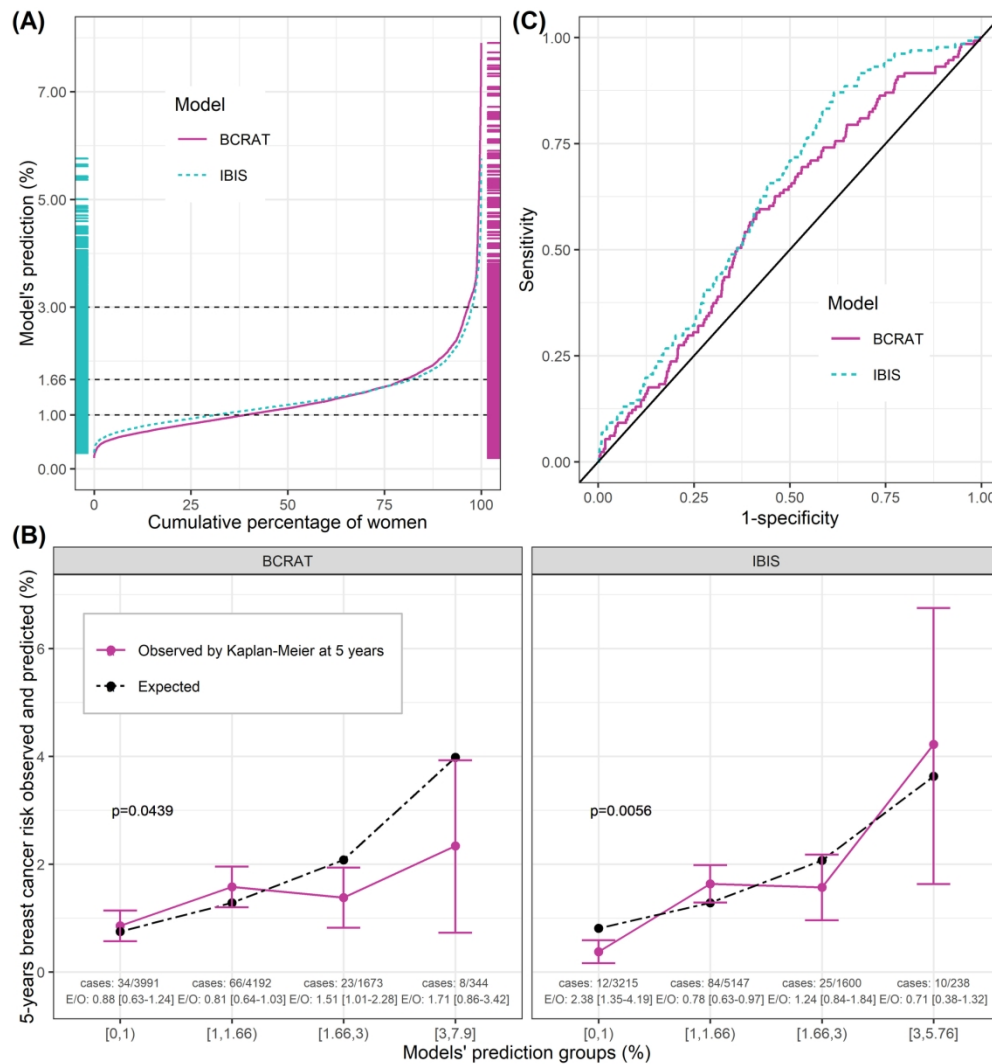

Absolute risk distribution and performance of the BCRAT and IBIS models in the Clinical-based cohort. (A) Distribution of models' predictions as a function of cumulative percentage of women. Rug plot on the y-axis. (B) Calibration according to the models' predictions groups. P values were computed using a goodness of fit test statistic compared to the critical value from the chi-squared distribution. E/O: expected-to-observed cases. (C) Discrimination power of the models according to sensitivity and specificity. C-index was calculated using the Inverse Probability of Censoring Weighting (IPCW) estimation of cumulative time-dependent ROC curve.

169x179mm (300 x 300 DPI)

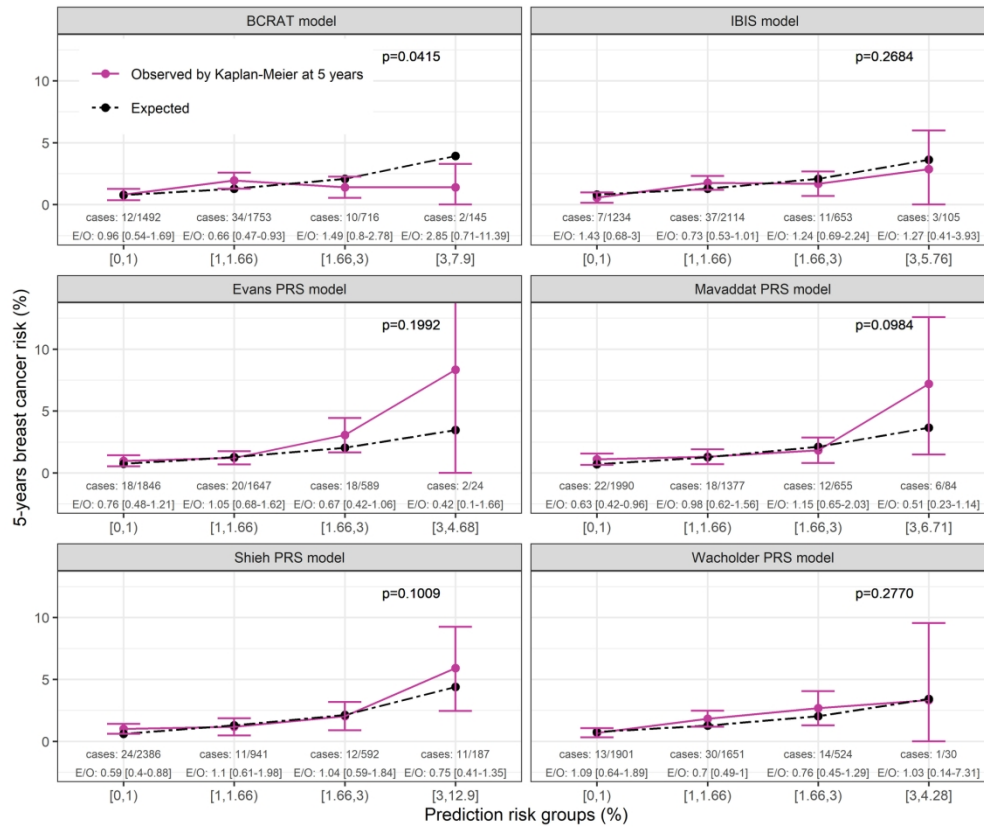

Calibration according to BCRAT, IBIS and PRS scores' predictions groups. PRS: polygenic risk score. E/O: expected-to-observed cases. Results from the clinicogenetic-based cohort. P values were computed using a goodness of fit test statistic compared to the critical value from the chi-squared distribution. Each PRS models name referred to the first author of the study from which the PRS were derived.

179x149mm (300 x 300 DPI)

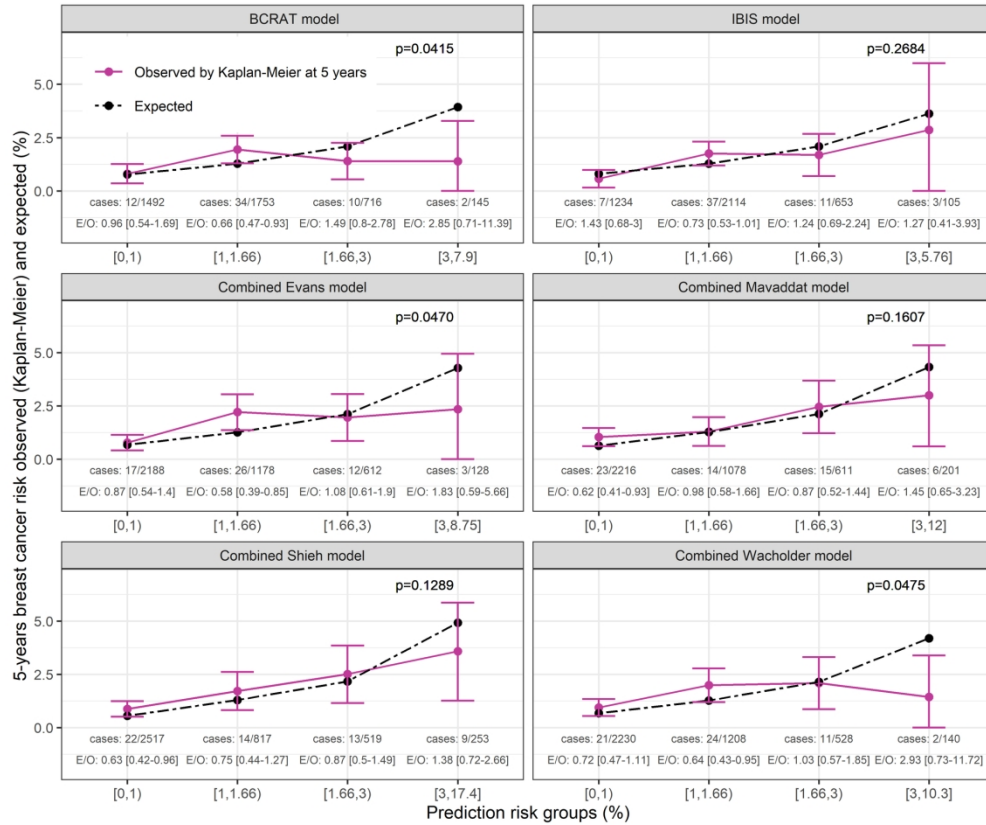

Calibration according to BCRAT, IBIS and combined models' predictions groups. PRS: polygenic risk score. E/O: expected-to-observed cases. Results from the clinicogenetic-based cohort. P values were computed using a goodness of fit test statistic compared to the critical value from the chi-squared distribution. Each PRS models name referred to the first author of the study from which the PRS were derived.

179x149mm (300 x 300 DPI)



# Supplementary Methods

## Health databases

For identifying participants who had breast cancer, we used two administrative health databases (AHD): 1) the MED-ÉCHO AHD: this database contains all the Quebec Health Insurance Board (RAMQ) diagnoses, hospitalizations and physician claims of insured patients (about 98% of Quebec residents [1]), excluding private healthcare; in the case of cancers, all patients are treated in the public sector. Data were available from January 1<sup>st</sup>, 1998 to March 31<sup>st</sup>, 2016. Dates of death were also retrieved from the RAMQ; 2) the Quebec Breast Cancer Registry: it contains information about the Quebec Breast Cancer Screening Program, such as mammograms' results and breast cancers histological confirmation. Data were available from May 15<sup>th</sup>, 1998 to December 31<sup>st</sup>, 2017.

## References

- 1 RAMQ. Table PA.01 - Nombre de personnes inscrites et admissibles au régime d'assurance maladie du Québec selon le sexe, le groupe d'âge et la région sociosanitaire. 2017. [https://www4.prod.ramq.gouv.qc.ca/IST/CD/CDF\\_DifsnInfoStats/CDF1\\_CnsulInfoStatsCNC\\_iut/DifsnInfoStats.aspx?ETAPE\\_COUR=3&IdPatronRapp=8&Annee=2017&Per=0&LANGUE=en-CA](https://www4.prod.ramq.gouv.qc.ca/IST/CD/CDF_DifsnInfoStats/CDF1_CnsulInfoStatsCNC_iut/DifsnInfoStats.aspx?ETAPE_COUR=3&IdPatronRapp=8&Annee=2017&Per=0&LANGUE=en-CA) (accessed 25 Nov 2019).

## Genetic data

Genotypes were included in the CaG database and were obtained from hybridation upon three different chips: Illumina Omni 2.5M (7.7% of the participants), Affymetrix Axiom UK biobank (8.2%) and Illumina Infinium Global Screening Array (84.1%). A quality control (QC) was made before the imputation (detailed pipeline can be found at [www.cartagene.qc.ca/info-genetic-data](http://www.cartagene.qc.ca/info-genetic-data)): 1) QC sample: for replicated samples, samples with the lowest call rates were removed. Sample with a call rate below 95% were removed. Samples pairs with an identity by state (IBS) higher than 0.20 and similar to at least 50% of the whole set were removed. Then, for pair of samples with an IBS higher than 0.85, when the correct sample could not be identified with certainty, both samples of the pair were removed. Samples with discrepancy between sex chromosome genotypes and reported

1  
2  
3 gender were removed. 2) QC SNP: SNPs with a call rate lower than 95% or deviating from  
4 Hardy–Weinberg equilibrium (with a  $10^{-6}$  threshold) were removed.  
5  
6  
7  
8

9 For the imputation, data were prepared using the Will Rayner toolbox  
10 (www.well.ox.ac.uk/~wrayner/tools/) with the Haplotype Reference Consortium (HRC) as  
11 reference panel [1]. To impute missing SNPs of our cohort, we used the Michigan Imputation  
12 Server with the Minimac4 algorithm [2], with separate chromosomes and chips. Imputation  
13 reference panel was the HRC r1.1 2016 European population, and the phasing was made  
14 with Eagle v2.4 [3]. A total of 39,131,578 SNPs were retrieved.  
15  
16  
17  
18  
19  
20  
21  
22  
23

24 After imputation and after merging chromosomes, we used men and women to perform a  
25 sample QC based on the Anderson *et al.* protocole [4]: samples with a call rate lower than  
26 95% and an heterozygosity higher than 3 standard deviation were removed. After LD  
27 pruning (window size: 50kb; step size: 5 variants; pairwise  $r^2$  threshold: 0.2), for pair of  
28 participants with an IBS higher than 0.1875, the sample with the lowest call rate was  
29 removed. To remove samples with divergent ancestries, we used the two first principal  
30 components with the HapMap phase III reference panel. As we would like to have all SNPs  
31 available for calculating PRS, we did not perform an additional SNPs QC. QC process was  
32 performed using PLINK v1.90b6.2 and v2.00a2LM 64-bit ([5,6]; URL:  
33 pngu.mgh.harvard.edu/purcell/plink/).  
34  
35  
36  
37  
38  
39  
40  
41  
42  
43  
44  
45  
46

## 47 References

- 48 1. the Haplotype Reference Consortium, McCarthy S, Das S, Kretzschmar W, Delaneau O,  
49 Wood AR, et al. A reference panel of 64,976 haplotypes for genotype imputation. *Nat*  
50 *Genet.* 2016;48:1279.
- 51 2. Das S, Forer L, Schönherr S, Sidore C, Locke AE, Kwong A, et al. Next-generation  
52 genotype imputation service and methods. *Nat Genet.* 2016;48(10):1284–7.
- 53 3. Loh P-R, Danecek P, Palamara PF, Fuchsberger C, A Reshef Y, K Finucane H, et al.  
54 Reference-based phasing using the Haplotype Reference Consortium panel. *Nat Genet.*  
55 2016;48(11):1443–8.
- 56 4. Anderson CA, Pettersson FH, Clarke GM, Cardon LR, Morris AP, Zondervan KT. Data  
57 quality control in genetic case-control association studies. *Nat Protoc.* 2010  
58 Sep;5(9):1564–73.  
59  
60

5. Purcell S, Neale B, Todd-Brown K, Thomas L, Ferreira MAR, Bender D, et al. PLINK: a tool set for whole-genome association and population-based linkage analyses. *Am J Hum Genet.* 2007 Sep;81(3):559–75.
6. Chang CC, Chow CC, Tellier LC, Vattikuti S, Purcell SM, Lee JJ. Second-generation PLINK: rising to the challenge of larger and richer datasets. *GigaScience.* 2015 Dec;4(1):7.

## Absolute risk of breast cancer

The absolute risk of breast cancer over an established period  $[t_0, t_1]$  (five years in this study) is the probability that a woman who is free of a breast cancer at age  $t_0$  and has a risk score  $S$  will be diagnosed with breast cancer over the period  $[t_0, t_1]$ .

Under the assumption of a multiplicative proportional hazard model (or Cox model), this latter conditional probability (denoted  $AR(t_0, t_1; S)$ ) can be written such as:

$$AR(t_0, t_1; S) = \int_{t_0}^{t_1} \lambda_0(t) e^S \exp \left[ - \int_t^{t_0} \lambda_0(u) e^S + \gamma(u) du \right] dt$$

where  $\lambda_0(t)$  and  $\gamma(t)$  are the baseline age-specific hazard rate for breast cancer and the age-specific mortality hazard rate from other causes (competing risks), respectively. In practice, the absolute risk is computed using piece-wise constant hazard rates.

These baseline hazard rates are calculated using marginal (or composite) hazard rates obtained from registries, together with either the attributable hazard function or the risk factor distribution.

In this work, the timescale of the analyses was age of an individual so that  $t_0$  was the age of a woman at entry into the cohort and  $t_1$  was the age five years later.

For the IBIS model, the baseline age-specific hazard rate for breast cancer is replaced by a hazard rate estimate obtained from the segregation model conditionally on the woman's family history.

## Variables extraction

Age at inclusion was calculated using the birthdate. We retrieved from the CARTaGENE questionnaire the first menstrual period, first live birth, number of first-degree relatives with breast cancer, ethnicity, menopause occurrence and age at menopause, height, weight, hormonal replacement therapy (HRT) use, length of HRT and last HRT use. If first menstrual period occurred after first live birth, both were considered as missing. We retrieved from the Quebec Breast Cancer Registry the previous breast biopsy and the number of biopsy with hyperplasia, atypical hyperplasia and lobular carcinoma *in situ*. We retrieved from the RAMQ the occurrence and age of ovary cancers.

|    |                            |                                     |                 |        |                |
|----|----------------------------|-------------------------------------|-----------------|--------|----------------|
| 1  |                            |                                     |                 |        |                |
| 2  |                            |                                     |                 |        |                |
| 3  | snp;id*;genes;wacholder**; | evans;                              | mavaddat;       | shieh; | shieh_asian*** |
| 4  | rs13387042                 | 88;0                                | 88;0            | 88;1   | 06             |
| 5  | rs1045485;                 | 96;-;-                              |                 |        |                |
| 6  | rs999737;                  | 1 92;0                              | 92;0            | 93     |                |
| 7  | rs3817198;                 | 07;1                                | 07;1            | 07     |                |
| 8  | rs889312;                  | 5 12;1                              | 12;1            | 12;1   | 05             |
| 9  | rs7716600;                 | 5:44875005;AC093297.2 - AC114954.1; | 1.11/1.46;-;-;- |        |                |
| 10 | rs1328161;                 | POU5F1B PCAT1;                      | 1.109;1         | 09;1   | 03             |
| 11 | rs3803662;                 | 23;1                                | 23;1            | 24;1   | 15             |
| 12 | rs2981582;                 | 10:123352317;FGFR2;                 | 1.18/1.6;-;-;-  |        |                |
| 13 | rs1124943;                 | 09;1                                | 10;1            | 09;1   | 16             |
| 14 | rs1099519;                 | C ZNF365;;                          | 0 86;0          | 86;0   | 86;0           |
| 15 | rs1562430;                 | CASC8 PCAT1;;                       | 0 90;-;1        | 16;1   | 16             |
| 16 | rs909116;                  | 1 93;-;-                            |                 |        |                |
| 17 | rs1156287;                 | 93;-;-                              |                 |        |                |
| 18 | rs713588;                  | 1 01;-;-                            |                 |        |                |
| 19 | rs8009944;                 | 04;-;-                              |                 |        |                |
| 20 | rs1093193;                 | 04;-;-                              |                 |        |                |
| 21 | rs1011970;                 | 05;1                                | 05;1            | 06;1   | 06             |
| 22 | rs704010;                  | 1 09;1                              | 07;1            | 08;1   | 05             |
| 23 | rs4973768;                 | 09;1                                | 09;1            | 10;1   | 11             |
| 24 | rs9790879;                 | 09;-;-                              |                 |        |                |
| 25 | rs3757318;                 | 16;-;1                              | 16;1            | 16     |                |
| 26 | rs614367;                  | 1 21;-;1                            | 21;1            | 29     |                |
| 27 | rs2981579;                 | 27;1                                | 25;1            | 27;1   | 27             |
| 28 | rs1077139;                 | 86;0                                | 86;1            | 15     |                |
| 29 | rs865686;                  | 9 90;0                              | 89;1            | 04     |                |
| 30 | rs6828523;                 | 91;0                                | 90;1            | 11     |                |
| 31 | rs1735690;                 | 91;0                                | 91;1            | 08     |                |
| 32 | rs6472903;                 | 91;0                                | 91;1            | 16     |                |
| 33 | rs4849887;                 | 92;0                                | 91;1            | 07     |                |
| 34 | rs1353747;                 | PDE4D;;                             | 92;0            | 92;1   | 00             |
| 35 | rs1292011;                 | 92;0                                | 92;1            | 11     |                |
| 36 | rs2236007;                 | 92;0                                | 93;1            | 09     |                |
| 37 | rs2823093;                 | 93;0                                | 92;1            | 08     |                |
| 38 | rs1781744;                 | 93;0                                | 93;1            | 09     |                |
| 39 | rs6504950;                 | 93;0                                | 94;1            | 02     |                |
| 40 | rs4808801;                 | 93;1                                | 08;1            | 04     |                |
| 41 | rs2736108;                 | 94;0                                | 94;0            | 94     |                |
| 42 | rs1124267;                 | 94;0                                | 94;0            | 99     |                |
| 43 | rs616488;                  | 1 94;0                              | 94;1            | 06     |                |
| 44 | rs1119991;                 | 94;0                                | 95;1            | 03     |                |
| 45 | rs3903072;                 | 94;0                                | 95;1            | 05     |                |
| 46 | rs1550623;                 | 94;1                                | 06;1            | 21     |                |
| 47 | rs720475;                  | 7 95;0                              | 94;1            | 02     |                |
| 48 | rs1436904;                 | AQP4-AS1                            | 95;0            | 96;1   | 02             |
| 49 | rs2016394;                 | 95;-;-                              |                 |        |                |
| 50 | rs527616;                  | 1 96;0                              | 95;1            | 03     |                |
| 51 | rs1182064;                 | 96;0                                | 95;1            | 05     |                |
| 52 | rs2380205;                 | 98;0                                | 94;1            | 02     |                |
| 53 | rs6678914;                 | 99;0                                | 91;1            | 10     |                |
| 54 | rs1006969;                 | 02;1                                | 06;1            | 05     |                |
| 55 | rs7591516;                 | 02;1                                | 31;1            | 00     |                |
| 56 | rs1242255;                 | 03;1                                | 05;1            | 05     |                |
| 57 | rs4245739;                 | 03;1                                | 14;1            | 14     |                |
| 58 | rs8170;                    | 19: AC010463 BABAM1;;               | 03;1            | 15;1   | 00             |
| 59 |                            |                                     |                 |        |                |
| 60 |                            |                                     |                 |        |                |

|    |                                  |      |    |
|----|----------------------------------|------|----|
| 1  |                                  |      |    |
| 2  |                                  |      |    |
| 3  | rs2363956; 03;-;-                |      |    |
| 4  | rs10472076; 04;1                 | 05;1 | 02 |
| 5  | rs12710696; 04;1                 | 10;1 | 10 |
| 6  | rs11075996; 04;1                 | 11;1 | 11 |
| 7  | rs7726159; 04;-;-                |      |    |
| 8  | rs9790517; 05;1                  | 05;1 | 02 |
| 9  | rs2042476; 05;1                  | 05;1 | 03 |
| 10 | rs10759246; 05;1                 | 06;1 | 05 |
| 11 | rs12493607; 05;1                 | 06;1 | 05 |
| 12 | rs2046210; 05;1                  | 15;1 | 27 |
| 13 | rs17529117; 05;-;-               |      |    |
| 14 | rs7904519; 06;1                  | 06;1 | 02 |
| 15 | rs3760982; 06;1                  | 06;1 | 02 |
| 16 | rs9417641; 06;1                  | 06;1 | 05 |
| 17 | rs7072776; 06;1                  | 07;1 | 04 |
| 18 | rs11780156; 07;1                 | 07;1 | 00 |
| 19 | rs6762644; 07;1                  | 07;1 | 03 |
| 20 | rs9693444; 07;1                  | 07;1 | 08 |
| 21 | rs1432679; 07;1                  | 07;1 | 09 |
| 22 | rs2588809; 07;1                  | 08;1 | 06 |
| 23 | rs16857606; 07;1                 | 08;1 | 07 |
| 24 | rs11552446; 08;1                 | 07;1 | 03 |
| 25 | rs13329836; 08;1                 | 08;1 | 02 |
| 26 | rs1323902; 11;1                  | 12;1 | 00 |
| 27 | rs10941676; 12;1                 | 13;1 | 08 |
| 28 | rs5542191; 12;1                  | 27;1 | 00 |
| 29 | rs6001930; 13;1                  | 12;1 | 03 |
| 30 | rs2943559; 13;1                  | 13;0 | 96 |
| 31 | rs12662670; 14;-;-               |      |    |
| 32 | rs78540526; 18;-;-               |      |    |
| 33 | rs11814446; 22;1                 | 26;1 | 08 |
| 34 | rs11571836; 26;1                 | 26;1 | 00 |
| 35 | rs17879966; 36;1                 | 36;1 | 00 |
| 36 | rs14006816; 60;1                 | 00   |    |
| 37 | rs10822016; ZNF365;-;-; 89;1     |      | 08 |
| 38 | rs9485372; 90;1                  | 11   |    |
| 39 | rs10474356; 92;1                 | 09   |    |
| 40 | rs2290203; AC068831 PRC1-AS193;1 |      | 08 |
| 41 | rs17530066; 05;1                 | 05   |    |
| 42 | rs9383938; 08;1                  | 08   |    |
| 43 | rs4951011; ZC3H11A; 09;1         |      | 09 |
| 44 | rs2284378; 10;1                  | 10   |    |
| 45 | rs2392780; CASC8 PCAT1;-;-; 15;1 |      | 00 |
| 46 | rs4415084; 17;1                  | 00   |    |
| 47 | rs3822625; 36;1                  | 36   |    |
| 48 | rs7726354; 37;1                  | 37   |    |

\* SNPs' position were based on build GRCh37/hg19;-;-;-;-;-

\*\* OR for one allele/two alleles;-;-;-;-;-

\*\*\* OR from Shieh's study used for Asian women;-;-;-;-;-

54  
55  
56  
57  
58  
59  
60

**Table S2**

|                                            | <b>Clinical-based cohort</b> | <b>Clinicogenetic-based cohort</b> |
|--------------------------------------------|------------------------------|------------------------------------|
|                                            | <b>N=10,200</b>              | <b>N=4,555</b>                     |
| Breast cancer within 5 years               | 131 (1.28%)                  | 58 (1.27%)                         |
| BCRAT absolute risk (%)                    | 1.3 (0.7)                    | 1.3 (0.7)                          |
| Age at baseline (years)                    | 54.1 (7.7)                   | 54.1 (7.6)                         |
| Age categories:                            |                              |                                    |
| <=49                                       | 3,556 (34.9%)                | 1,557 (34.2%)                      |
| 50-59                                      | 3,980 (39.0%)                | 1,839 (40.4%)                      |
| >=60                                       | 2,664 (26.1%)                | 1,159 (25.4%)                      |
| Birth province:                            |                              |                                    |
| In Canada outside Quebec                   | 333 (3.3%)                   | 74 (1.6%)                          |
| Outside Canada                             | 1,490 (14.6%)                | 189 (4.1%)                         |
| Quebec                                     | 8,373 (82.1%)                | 4,292 (94.2%)                      |
| Missing                                    | 4                            | 0                                  |
| Ethnicity:                                 |                              |                                    |
| Asian                                      | 188 (1.8%)                   | 5 (0.1%)                           |
| Black African                              | 182 (1.8%)                   | 0 (0.0%)                           |
| Hispanic non-american                      | 234 (2.3%)                   | 1 (<0.1%)                          |
| Other                                      | 542 (5.3%)                   | 86 (1.9%)                          |
| White/European                             | 9,054 (88.8%)                | 4,463 (98.0%)                      |
| Age at menarche (years):                   |                              |                                    |
| <=11                                       | 2,305 (22.9%)                | 1,027 (22.7%)                      |
| 12-13                                      | 4,754 (47.2%)                | 2,166 (47.9%)                      |
| >=14                                       | 3,021 (30.0%)                | 1,331 (29.4%)                      |
| Missing                                    | 120                          | 31                                 |
| Age at first live birth (years):           |                              |                                    |
| <=19                                       | 1,124 (13.1%)                | 422 (11.1%)                        |
| 20-24                                      | 2,955 (34.5%)                | 1,324 (34.8%)                      |
| 25-29                                      | 2,814 (32.9%)                | 1,312 (34.5%)                      |
| >=30                                       | 1,621 (19.0%)                | 734 (19.3%)                        |
| Nulliparous                                | 40 (0.5%)                    | 14 (0.4%)                          |
| Missing                                    | 1,646                        | 749                                |
| First-degree relatives with breast cancer: |                              |                                    |
| 0                                          | 8,945 (87.7%)                | 3,949 (86.7%)                      |
| 1                                          | 1,130 (11.1%)                | 556 (12.2%)                        |
| >=2                                        | 125 (1.23%)                  | 50 (1.10%)                         |
| Previous breast biopsy:                    |                              |                                    |
| 0                                          | 10,023 (98.3%)               | 4,463 (98.0%)                      |
| 1                                          | 134 (1.31%)                  | 71 (1.56%)                         |

|                                 |                                       |                  |                  |
|---------------------------------|---------------------------------------|------------------|------------------|
|                                 | $\geq 2$                              | 43 (0.42%)       | 21 (0.46%)       |
| History of hyperplasia          |                                       | 6 (0.06%)        | 1 (0.02%)        |
| History of atypical hyperplasia |                                       | 1 (0.56%)        | 0 (0.00%)        |
| Lobular Carcinoma In Situ       |                                       | 0                | 0                |
| Weight (Kg)                     |                                       | 67.4 [59.4;78.0] | 66.8 [59.6;76.8] |
| Height (m)                      |                                       | 1.61 [1.57;1.65] | 1.61 [1.57;1.65] |
| History of ovary cancer         |                                       | 94 (0.92%)       | 46 (1.01%)       |
| Menopause occurrence            |                                       |                  |                  |
|                                 | Pre-menopausal                        | 4176 (40.9%)     | 1891 (41.5%)     |
|                                 | Post-menopausal                       | 5885 (57.7%)     | 2617 (57.5%)     |
|                                 | Unknown                               | 139 (1.36%)      | 47 (1.03%)       |
| Use of HRT                      |                                       |                  |                  |
|                                 | Never                                 | 7477 (73.3%)     | 3249 (71.3%)     |
|                                 | Previous user (more than 5 years ago) | 1126 (11.0%)     | 506 (11.1%)      |
|                                 | Previous user (less than 5 years ago) | 1285 (12.6%)     | 646 (14.2%)      |
|                                 | Current user                          | 312 (3.06%)      | 154 (3.38%)      |
| HRT length of use (years)       |                                       | 0.00 [0.00;1.00] | 0.00 [0.00;1.00] |
| Last HRT use (years)            |                                       | 0.00 [0.00;0.00] | 0.00 [0.00;0.00] |
| Mother history of breast cancer |                                       | 832 (8.16%)      | 412 (9.05%)      |
| Mother history of ovary cancer  |                                       | 114 (1.12%)      | 60 (1.32%)       |
| Father history of breast cancer |                                       | 8 (0.08%)        | 2 (0.04%)        |

HRT: hormonal replacement therapy; PRS: polygenic risk score; clinical-based cohort: validation of the BCRAT and IBIS models, included women with a BCRAT and an IBIS score; clinicogenetic-based cohort: validation of the PRS models and comparison with the BCRAT and IBIS models, genotyped women with all SNPs available.

\* Not available for the phase 2

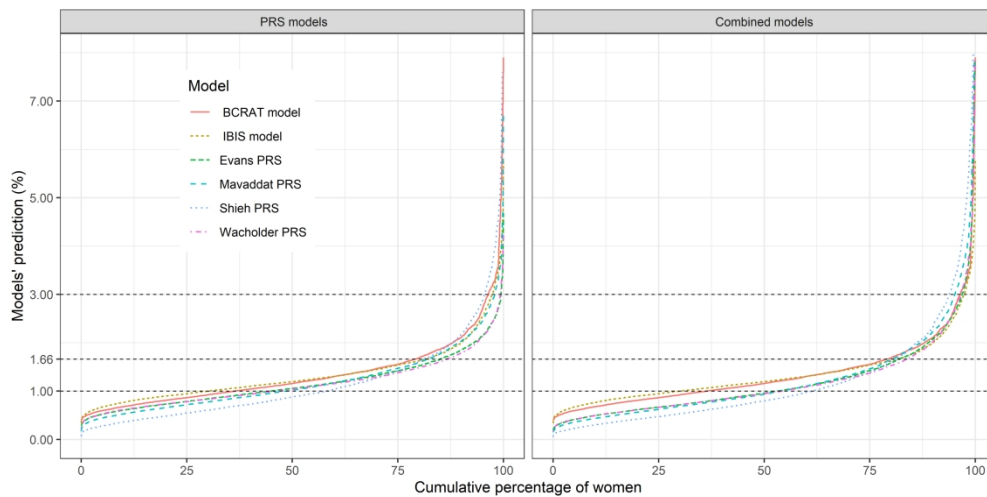

254x127mm (300 x 300 DPI)



1  
2  
3  
4  
5  
6  
7  
8  
9  
10  
11  
12  
13  
14  
15  
16  
17  
18  
19  
20  
21  
22  
23  
24  
25  
26  
27  
28  
29  
30  
31  
32  
33  
34  
35  
36  
37  
38  
39  
40  
41  
42  
43  
44  
45  
46  
47  
48  
49  
50  
51  
52  
53  
54  
55  
56  
57  
58  
59  
60

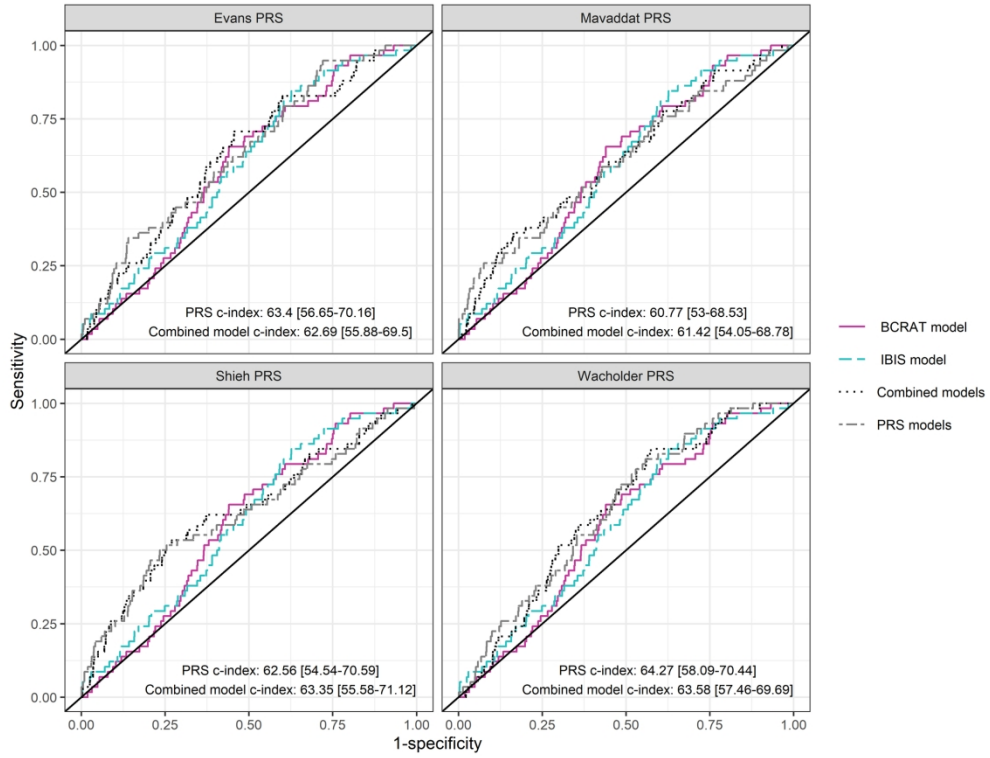

186x142mm (300 x 300 DPI)

## As this is a validation study, the STROBE checklist is not fully adapted.

STROBE Statement—Checklist of items that should be included in reports of *cohort studies*

|                           | Item No | Recommendation                                                                                                                                                                                    | Page number |
|---------------------------|---------|---------------------------------------------------------------------------------------------------------------------------------------------------------------------------------------------------|-------------|
| <b>Title and abstract</b> | 1       | (a) Indicate the study's design with a commonly used term in the title or the abstract                                                                                                            | 1           |
|                           |         | (b) Provide in the abstract an informative and balanced summary of what was done and what was found                                                                                               | 1-2         |
| <b>Introduction</b>       |         |                                                                                                                                                                                                   |             |
| Background /rationale     | 2       | Explain the scientific background and rationale for the investigation being reported                                                                                                              | 3-5         |
| Objectives                | 3       | State specific objectives, including any prespecified hypotheses                                                                                                                                  | 5           |
| <b>Methods</b>            |         |                                                                                                                                                                                                   |             |
| Study design              | 4       | Present key elements of study design early in the paper                                                                                                                                           | 5-6         |
| Setting                   | 5       | Describe the setting, locations, and relevant dates, including periods of recruitment, exposure, follow-up, and data collection                                                                   | 5           |
| Participants              | 6       | (a) Give the eligibility criteria, and the sources and methods of selection of participants. Describe methods of follow-up                                                                        | 6           |
|                           |         | (b) For matched studies, give matching criteria and number of exposed and unexposed                                                                                                               | -           |
| Variables                 | 7       | Clearly define all outcomes, exposures, predictors, potential confounders, and effect modifiers. Give diagnostic criteria, if applicable                                                          | 7-8         |
| Data sources/ measurement | 8*      | For each variable of interest, give sources of data and details of methods of assessment (measurement). Describe comparability of assessment methods if there is more than one group              | 7-8         |
| Bias                      | 9       | Describe any efforts to address potential sources of bias                                                                                                                                         | 5           |
| Study size                | 10      | Explain how the study size was arrived at                                                                                                                                                         | 6           |
| Quantitative variables    | 11      | Explain how quantitative variables were handled in the analyses. If applicable, describe which groupings were chosen and why                                                                      | 7-8         |
| Statistical methods       | 12      | (a) Describe all statistical methods, including those used to control for confounding                                                                                                             | 8-9         |
|                           |         | (b) Describe any methods used to examine subgroups and interactions                                                                                                                               | -           |
|                           |         | (c) Explain how missing data were addressed                                                                                                                                                       | 7           |
|                           |         | (d) If applicable, explain how loss to follow-up was addressed                                                                                                                                    | 8-9         |
|                           |         | (e) Describe any sensitivity analyses                                                                                                                                                             | -           |
| <b>Results</b>            |         |                                                                                                                                                                                                   |             |
| Participants              | 13*     | (a) Report numbers of individuals at each stage of study—eg numbers potentially eligible, examined for eligibility, confirmed eligible, included in the study, completing follow-up, and analysed | 9           |
|                           |         | (b) Give reasons for non-participation at each stage                                                                                                                                              | 9           |
|                           |         | (c) Consider use of a flow diagram                                                                                                                                                                | Figure 1    |
| Descriptive data          | 14*     | (a) Give characteristics of study participants (eg demographic, clinical, social) and information on exposures and potential confounders                                                          | Table S2    |
|                           |         | (b) Indicate number of participants with missing data for each variable of                                                                                                                        | Table S2    |

|                          |     |                                                                                                                                                                                                              |          |
|--------------------------|-----|--------------------------------------------------------------------------------------------------------------------------------------------------------------------------------------------------------------|----------|
|                          |     | interest                                                                                                                                                                                                     |          |
|                          |     | (c) Summarise follow-up time (eg, average and total amount)                                                                                                                                                  | 9        |
| Outcome data             | 15* | Report numbers of outcome events or summary measures over time                                                                                                                                               | 9        |
| Main results             | 16  | (a) Give unadjusted estimates and, if applicable, confounder-adjusted estimates and their precision (eg, 95% confidence interval). Make clear which confounders were adjusted for and why they were included | 10-12    |
|                          |     | (b) Report category boundaries when continuous variables were categorized                                                                                                                                    | Table S2 |
|                          |     | (c) If relevant, consider translating estimates of relative risk into absolute risk for a meaningful time period                                                                                             | 9        |
| Other analyses           | 17  | Report other analyses done—eg analyses of subgroups and interactions, and sensitivity analyses                                                                                                               | 10-12    |
| <b>Discussion</b>        |     |                                                                                                                                                                                                              |          |
| Key results              | 18  | Summarise key results with reference to study objectives                                                                                                                                                     | 12       |
| Limitations              | 19  | Discuss limitations of the study, taking into account sources of potential bias or imprecision. Discuss both direction and magnitude of any potential bias                                                   | 13       |
| Interpretation           | 20  | Give a cautious overall interpretation of results considering objectives, limitations, multiplicity of analyses, results from similar studies, and other relevant evidence                                   | 12-13    |
| Generalisability         | 21  | Discuss the generalisability (external validity) of the study results                                                                                                                                        | 13       |
| <b>Other information</b> |     |                                                                                                                                                                                                              |          |
| Funding                  | 22  | Give the source of funding and the role of the funders for the present study and, if applicable, for the original study on which the present article is based                                                | 21       |

\*Give information separately for exposed and unexposed groups.

**Note:** An Explanation and Elaboration article discusses each checklist item and gives methodological background and published examples of transparent reporting. The STROBE checklist is best used in conjunction with this article (freely available on the Web sites of PLoS Medicine at <http://www.plosmedicine.org/>, Annals of Internal Medicine at <http://www.annals.org/>, and Epidemiology at <http://www.epidem.com/>). Information on the STROBE Initiative is available at <http://www.strobe-statement.org>.

# BMJ Open

## Validation of breast cancer risk assessment tools on a French-Canadian population-based cohort

|                                 |                                                                                                                                                                                                                                                                                                                                                         |
|---------------------------------|---------------------------------------------------------------------------------------------------------------------------------------------------------------------------------------------------------------------------------------------------------------------------------------------------------------------------------------------------------|
| Journal:                        | <i>BMJ Open</i>                                                                                                                                                                                                                                                                                                                                         |
| Manuscript ID                   | bmjopen-2020-045078.R1                                                                                                                                                                                                                                                                                                                                  |
| Article Type:                   | Original research                                                                                                                                                                                                                                                                                                                                       |
| Date Submitted by the Author:   | 22-Dec-2020                                                                                                                                                                                                                                                                                                                                             |
| Complete List of Authors:       | Jantzen, Rodolphe; CHU Sainte-Justine, Centre de recherche Payette, Yves; CHU Sainte-Justine Centre de Recherche de Malliard, Thibault; CHU Sainte-Justine Centre de Recherche Labbé, Catherine; CHU Sainte-Justine Centre de Recherche Noisel, Nolwenn; CHU Sainte-Justine Centre de Recherche Broët, Philippe; CHU Sainte-Justine Centre de Recherche |
| <b>Primary Subject Heading</b>: | Public health                                                                                                                                                                                                                                                                                                                                           |
| Secondary Subject Heading:      | Epidemiology, Genetics and genomics, Oncology                                                                                                                                                                                                                                                                                                           |
| Keywords:                       | Breast tumours < ONCOLOGY, EPIDEMIOLOGY, GENETICS, PREVENTIVE MEDICINE, PUBLIC HEALTH                                                                                                                                                                                                                                                                   |
|                                 |                                                                                                                                                                                                                                                                                                                                                         |

SCHOLARONE™  
Manuscripts



I, the Submitting Author has the right to grant and does grant on behalf of all authors of the Work (as defined in the below author licence), an exclusive licence and/or a non-exclusive licence for contributions from authors who are: i) UK Crown employees; ii) where BMJ has agreed a CC-BY licence shall apply, and/or iii) in accordance with the terms applicable for US Federal Government officers or employees acting as part of their official duties; on a worldwide, perpetual, irrevocable, royalty-free basis to BMJ Publishing Group Ltd ("BMJ") its licensees and where the relevant Journal is co-owned by BMJ to the co-owners of the Journal, to publish the Work in this journal and any other BMJ products and to exploit all rights, as set out in our [licence](#).

The Submitting Author accepts and understands that any supply made under these terms is made by BMJ to the Submitting Author unless you are acting as an employee on behalf of your employer or a postgraduate student of an affiliated institution which is paying any applicable article publishing charge ("APC") for Open Access articles. Where the Submitting Author wishes to make the Work available on an Open Access basis (and intends to pay the relevant APC), the terms of reuse of such Open Access shall be governed by a Creative Commons licence – details of these licences and which [Creative Commons](#) licence will apply to this Work are set out in our licence referred to above.

Other than as permitted in any relevant BMJ Author's Self Archiving Policies, I confirm this Work has not been accepted for publication elsewhere, is not being considered for publication elsewhere and does not duplicate material already published. I confirm all authors consent to publication of this Work and authorise the granting of this licence.

# Validation of breast cancer risk assessment tools on a French-Canadian population-based cohort

Rodolphe Jantzen<sup>1,2,\*</sup>, Yves Payette<sup>1</sup>, Thibault de Malliard<sup>1</sup>, Catherine Labbé<sup>1</sup>, Nolwenn Noisel<sup>1,2</sup>, Philippe Broët<sup>1,2,3,4,\*</sup>

<sup>1</sup>CARTaGENE, Research Center, CHU Sainte-Justine, Montreal, Quebec, Canada

<sup>2</sup>Université de Montréal, Montréal, Québec, Canada

<sup>3</sup>University Paris-Saclay, CESP, INSERM, Villejuif, France

<sup>4</sup>Assistance Publique-Hôpitaux de Paris (AP-HP), Hôpitaux Universitaires Paris-Sud, Hôpital Paul Brousse, 12 Avenue Paul Vaillant Couturier, 94807 Villejuif, France

## \* Correspondence:

Rodolphe Jantzen, rodolphe.jantzen@gmail.com

Philippe Broët, philippe.broet@umontreal.ca

**Keywords:** Breast cancer, Validation Study, Clinical Decision Rules, Polygenic risk score, BCRAT, IBIS

## Abstract

**Objectives:** Evaluate the accuracy of the Breast Cancer Risk Assessment Tool (BCRAT), International Breast Cancer Intervention Study risk evaluation tool (IBIS), polygenic risk scores (PRS) and combined scores (BCRAT+PRS) to predict the occurrence of invasive breast cancers at five years in a French-Canadian population.

**Design:** Population-based cohort study.

**Setting:** We used the population-based cohort CARTaGENE, composed of 43,037 Quebec residents aged between 40 and 69 years and broadly representative of the population recorded on the Quebec administrative health insurance registries.

**Participants:** 10,200 women recruited in 2009-2010 were included for validating BCRAT and IBIS and 4,555 with genetic information for validating the PRS and combined scores.

**Outcome measures:** We computed the absolute risks of breast cancer at five years using BCRAT, IBIS, four published PRS and combined models. We reported the overall calibration performance, goodness-of-fit test and discriminatory accuracy.

**Results:** 131 (1.28%) women developed a breast cancer at five years for validating BCRAT and IBIS and 58 (1.27%) for validating PRS and combined scores. Median follow-up was 5 years. BCRAT and IBIS had an overall expected-to-observed ratio of 1.01 [0.85-1.19] and 1.02 [0.86-1.21] but with significant differences when partitioning by risk groups ( $p < 0.05$ ). IBIS' c-index was significantly higher than BCRAT (63.42 [59.35-67.49] versus 58.63 [54.05-63.21],  $p = 0.013$ ). PRS scores had a global calibration around 0.82, with a confidence interval including one, and non-significant goodness-of-fit tests. PRS' c-indexes were non-significantly higher than BCRAT and IBIS, the highest being 64.43 [58.23-70.63]. Combined models did not improve the results.

**Conclusions:** In this French-Canadian population-based cohort, BCRAT and IBIS have good mean calibration that could be improved for risk subgroups, and modest discriminatory accuracy. Despite this modest discriminatory power, these tools can be of interest for primary care physicians for delivering a personalized message to their high risk patients, regarding screening and lifestyle counseling.

### **Strengths and limitations of this study**

- First study to evaluate risk assessment tools in a French-Canadian population for predicting breast cancer.
- Population based-cohort representative of the French-Canadian urban population of middle-aged and older adults.
- Linkage with administrative health databases and the Quebec Breast Cancer Registry, which improved the outcome quality and accuracy, and made possible to use variables usually difficult to obtain.
- May not apply to younger women under forty years old.

- Since the genotyping information was not available for all the cohort, the models had to be evaluated on two different sub-cohorts.

## 1 Introduction

Breast cancer is the most frequently diagnosed cancer and the second leading cause of death by cancer among the Canadian women [1]. However, assessing the individual risk of breast cancer remains a challenge. In this context, risk prediction models have been developed and implemented. The two most widely used are the Breast Cancer Risk Assessment Tool (BCRAT) and the International Breast Cancer Intervention Study risk evaluation tool (IBIS) [2,3].

The National Cancer Institute's BCRAT was developed by Dr. Mitchell Gail in 1989 using 5,998 American women from a case-control study [2]. It provides an estimate of a woman's risk of developing invasive breast cancer over a specific period, knowing her personal risk factors. After its first release, this model has been validated in an American cohort [4], mainly composed of white women, and was later calibrated for African American, Hispanic, Asian and Pacific Islander women [5,6]. The most recent version uses six clinical risk factors: current age, age at first menstrual period, age at first live birth, number of first-degree relatives with breast cancer, history of previous breast biopsy and ethnicity. Several studies have assessed or updated the BCRAT model to specific populations (e.g., Asian, Oceanian) [7]. It is worth noting that this model, designed for use in the general population, is not intended to be used for women carrying inherited *BRCA1/2* mutations. The BCRAT model is used to guide physicians on breast cancer prevention strategies. As an example, the U.S. Food and Drug Administration recommended to consider chemo-prevention for women at high risk of breast cancer (i.e. a 5-year risk equal or higher than 1.66%), while the U.S. Preventive Services Task Force recommended chemo-prevention for a risk equal or higher than 3% [8]. The Canadian Task Force, as well as the Canadian Cancer Society, used a threshold of 1.66% [9,10]. Despite its implementation on the NCI's website ([bcrisktool.cancer.gov/](http://bcrisktool.cancer.gov/)), the lack of recent Canadian guidelines combined with its U.S.-centered use led to an under-use of the BCRAT model by Canadian primary care physicians. Indeed, a recent qualitative study showed that two-third of primary care physicians from two Canadian provinces (Ontario and Alberta) were unaware of the BCRAT tool [11].

The International Breast Cancer Intervention Study model (IBIS, also known as the Tyrer-Cuzick model) is also a widely used breast cancer risk prediction model, which takes into account multi-generational family history data and *BRCA1/2* mutation information. It has been developed with data



1  
2 from the International Breast Cancer Intervention Study including a cohort of daughters of patients  
3 diagnosed with the disease and has focused on the estimation of breast cancer lifetime risks through  
4 the analysis of family history, reproductive and hormonal factors, and individual characteristics [3].  
5 The IBIS model takes into account non-genetic risk factors (current age, age at menarche, number  
6 of live births, age at first live birth, age at menopause, height, weight, history of hyperplasia, breast  
7 density, history and age of ovarian cancer, hormone replacement therapy) together with multi-  
8 generational pedigree information and *BRCA1/2* gene mutations. IBIS can be used even for women  
9 without a family history of breast cancer and without *BRCA1/2* gene mutations information. A recent  
10 study suggested that IBIS has better ability to assess breast cancer risk than BCRAT but with close  
11 performance in women not known to have mutations in *BRCA1* or *BRCA2* gene mutation [12–14].  
12  
13  
14  
15  
16  
17  
18  
19

20 With the increasing availability and affordability of genetic information, there is a growing interest to  
21 incorporate individual-level genotype data into risk prediction models for increasing their  
22 discriminatory accuracy. The integration of such information into the BCRAT model has already  
23 been performed with the addition of seven SNPs associated with breast cancer. Results showed that  
24 the performance of the predicted breast cancer's risk was slightly improved, with an area under the  
25 ROC curve (AUC) increasing from 0.607 to 0.632 [15]. This kind of clinico-genetic model has also  
26 been done with IBIS leading to an improvement in the discriminative ability [16]. Alongside these  
27 works, many genetic-based or “polygenic risk scores” (PRS) have been published for breast cancer  
28 prediction. Most of them rely upon linear combinations of the risk-conferring variant alleles weighted  
29 by their effect sizes [17–20]. The list of these risk alleles with their corresponding weights is usually  
30 obtained from large case-control genome-wide association studies (GWAS) [21], with weights that  
31 can be adapted to specific ethnicities [19]. The predictive accuracy of these PRSs compared to  
32 classical prediction models, such as the BCRAT and IBIS, should now be evaluated in various  
33 populations.  
34  
35  
36  
37  
38  
39  
40  
41  
42  
43  
44

45 In Quebec, the Breast Cancer Screening Program consists of a mammogram every two years for  
46 women aged 50 to 69 [22]. Although this screening decreased the number of deaths from breast  
47 cancer [23], it could be stressful with non-negligible costs for the public health system. In this  
48 context, risk assessment tools could be helpful for primary care physicians to enhance screening  
49 uptake among high risk patients who are less likely to participate in organized screening. Some  
50 previous studies have assessed the accuracy of the BCRAT risk predictions in Canadian women  
51 [12,24], but they were limited to specific ethnic populations or were part of multi-countries cohorts.  
52  
53  
54  
55  
56  
57  
58  
59  
60

1  
2 The fact that BCRAT and IBIS have not been evaluated in the French-Canadian population, which  
3 has specific genetic patterns, as compared to the general European population [25,26], with lifestyle  
4 risk factors (e.g., nutrition) that are at the intersection between North America and Europe, prompted  
5 us to evaluate their predictive abilities in the population-based cohort CARTaGENE from Quebec.  
6  
7  
8

9  
10 In this study, we report the predictive accuracies of the BCRAT model, the IBIS model and  
11 polygenic risk scores to predict the occurrence of invasive breast cancers at five years in middle-aged  
12 and older French-Canadian women.  
13  
14  
15

## 16 **2 Materials and methods**

### 17 **2.1 Design and participants selection**

18  
19 The CARTaGENE population-based cohort is composed of 43,037 Quebec residents aged between  
20 40 and 69 years, recruited during two phases (2009-2010 and 2013-2014). With a rich collection of  
21 data including phenotyping and genotyping data, CARTaGENE is the largest ongoing prospective  
22 population cohort and biobank in Québec, Canada [27]. Details on recruitment and sample selection  
23 have been described previously [27].  
24  
25  
26  
27  
28  
29  
30

31 To comprehensively identify participants with an invasive breast cancer and the incidence date, we  
32 used two administrative health databases, the Quebec Health Insurance Board (RAMQ) and the  
33 Quebec Breast Cancer Registry (see Supplementary Methods), and an algorithm based on a previous  
34 report from the *Institut National de Santé Publique du Québec* (INSPQ) [28] and the Tonelli *et al.*  
35 algorithm [29]. Using the Breast Cancer Registry, we retrieved the incidence date of histologically  
36 confirmed breast cancers. Then, as some women with a breast cancer might not have a histologically  
37 confirmed cancers in the Breast Cancer Registry, we selected in this registry all women having an  
38 abnormal mammography (i.e., lesion suspected of malignancy) without histologically confirmed  
39 breast cancers and retrieved, when available, the incidence date after the abnormal mammography  
40 from the RAMQ database for women with at least two claims in two years or one hospitalization  
41 with the appropriate International Classification of Diseases (ICD), Ninth or Tenth Revision codes  
42 (174 and C50). Adherence to mammography was not available.  
43  
44  
45  
46  
47  
48  
49  
50  
51

52 For this study, we have considered the women without a breast cancer before the inclusion date from  
53 the CARTaGENE first phase of recruitment as the family history of breast cancer was not available  
54 for the participants of the phase 2. Recruitment was unrelated to the last mammography screening.  
55  
56  
57  
58  
59  
60

1  
2 The validation of the BCRAT and IBIS models was done on the sub-cohort of 10,200 women with  
3 available information for computing the BCRAT and IBIS models (hereinafter referred as clinical-  
4 based cohort (CC)). The validation of the PRS was done on the sub-cohort of 4,555 women with  
5 available genotyping information (hereinafter referred as clinicogenetic-based cohort (CGC)) (Figure  
6 1). We also compared PRS to the BCRAT and IBIS models on the CGC cohort.  
7  
8  
9

## 10 11 **2.2 Genetic data**

12  
13  
14 Only a fraction of the CARTaGENE population cohort has been genotyped. These participants were  
15 selected to be genotyped through various scientific projects unrelated to breast cancer [30–32].  
16 Single-nucleotide polymorphism (SNP) positions were based on build GRCh37/hg19. The detailed  
17 pipeline about quality control and imputation can be found at [www.cartagene.qc.ca/info-genetic-data](http://www.cartagene.qc.ca/info-genetic-data)  
18 and in the Supplementary Methods.  
19  
20  
21  
22

## 23 24 **2.3 Outcome**

25  
26 The outcome of interest was the time of occurrence of the breast cancer from the enrollment in the  
27 cohort. Patients without breast cancer occurrence were censored at the end of the five-years study  
28 period (administrative censoring) or at death.  
29  
30  
31

## 32 33 **2.4 Predictive scores**

### 34 35 **2.4.1 Absolute risk using the BCRAT and the IBIS models**

36  
37 The absolute risk of breast cancer estimated by BCRAT and IBIS is calculated using baseline hazard  
38 functions calculated from the marginal hazard functions (United States and United Kingdom  
39 incidence rates, respectively), and the attributable risk obtained from the United States population  
40 data (BCRAT) and the United Kingdom/Swedish population data (IBIS). In this article, the BCRAT  
41 and IBIS absolute risks of breast cancer at five years were calculated for each woman at the inclusion  
42 date using the National Institutes of Health R package “BCRA”, version 2.1 [33] and the latest  
43 version of the “IBIS Breast Cancer Risk Evaluation Tool” (<http://www.ems-trials.org/riskevaluator/>  
44 — version 8.0b, September 2017), respectively. Death as a competing risk was taken into account for  
45 both models.  
46  
47  
48  
49  
50  
51  
52

53  
54 All variables of the BCRAT model could be retrieved, while some variables of the IBIS model were  
55 not available and were considered missing: breast density, Ashkenazi Jewish heritage, HRT type,  
56 length of time woman intends to use HRT in the future, *BRCA1/2* genetic testing (participant and  
57  
58  
59

1 relatives), mother bilateral mastectomy, relatives' age of breast and ovary cancers, variables related  
2 to each sister, brother, grandmother, aunt, uncle and daughter. See Supplementary Methods for  
3 information about variables extraction and coding. Missing data can be handled in both BCRAT and  
4 IBIS models.  
5  
6  
7  
8  
9

#### 10 **2.4.2 Absolute risk using PRS**

11 For estimating the absolute risk of breast cancer using PRS, we have considered the procedure  
12 implemented in the iCARE package [34]. It requires the marginal (composite) rates for breast cancer  
13 and death, obtained here from Canada Health [35,36], and the relative risk distribution, obtained from  
14 the sampling at random of 10% of the individuals from the clinicogenetic-based cohort with small  
15 probability weights for the breast cancer cases. To avoid the optimism bias, we reported the results  
16 obtained using the 90% remaining (hereinafter referred as “validation CGC”).  
17  
18  
19  
20  
21  
22

23 In this study, woman's genotyping information were used for computing four different published  
24 PRS: Wacholder *et al.* [17] (10 SNPs), Mavaddat *et al.* [18] (77 SNPs), Shieh *et al.* [19] (86 SNPs)  
25 and Evans *et al.* [20] (18 SNPs). In the following, each PRS is referred to the name of the first author  
26 of the study. The SNPs and associated odds ratio can be found as Supplementary Table S1.  
27  
28  
29  
30

#### 31 **2.4.3 Absolute risk using a combination of BCRAT and PRS**

32 For estimating the absolute risk of breast cancer with a combination of BCRAT and PRS (hereinafter  
33 referred as “combined scores”), we summed the PRS and BCRAT scores (relative hazard regression  
34 scores), and used the same procedure as described in the section “Absolute risk using PRS”.  
35  
36  
37  
38  
39

40 As the hazard function obtained from the IBIS model is not an output of the software, we cannot  
41 combine the IBIS and PRS information in this work.  
42  
43

### 44 **2.5 Statistical analysis**

45 For comparing means between groups, we used a one-way ANOVA test. Relationships between  
46 categorical variables were tested using the  $\chi^2$  test. Statistical significance was considered as P-values  
47 less than 0.05. We plotted predictiveness curves (i.e., the risk quantile against the corresponding  
48 cumulative proportion of the population with risks below this quantile) with rug plots.  
49  
50  
51  
52  
53  
54  
55  
56  
57  
58  
59  
60

To assess the performance of the BCRAT, IBIS and PRS procedures for predicting invasive breast cancer risk, we reported calibration performance and discriminatory accuracy (see hereafter). We also reported the results obtained with the BCRAT and IBIS procedures in the validation CGC.

### 2.5.1 Calibration

We computed the expected-to-observed ratio (E/O), with the 95% confidence interval (95%CI), from the sum of the estimated risk divided by the number of observed cases. An E/O of 1 corresponds to perfect global calibration. We reported the intercept and slope estimates from logistic regression models (observed outcomes with the logit of the predicted probabilities as the independent variable).

We also compared the predicted and observed proportion of breast cancers in four absolute risk groups: <1% (low risk),  $\geq 1\%$  and <1.66% (intermediate risk),  $\geq 1.66\%$  and <3% (average risk),  $\geq 3\%$  (high risk). The observed proportion at five-year in each risk group was calculated using a Kaplan-Meier estimator. To test the null hypothesis of a global agreement between the observed and expected values across these groups, we computed a global test statistic ( $G = \sum_{i=1}^4 (O_i - E_i)^2 / E_i$ ) where  $O_i$  and  $E_i$  are respectively the observed and expected number of events in group  $i$ , and compared this latter to the critical value from the chi-squared distribution with four degrees of freedom.

### 2.5.2 Discrimination

The global discrimination was assessed by the c-statistic with an Inverse Probability of Censoring Weighting (IPCW) estimation of cumulative time-dependent ROC curve with their 95%CI [37–39]. Receiver operating characteristic (ROC) curves were plotted.

In the validation CGC, the c-indexes calculated with the BCRAT and IBIS scores were compared with those calculated with each PRS scores by using the independent and identically distributed-representation of the c-index estimators [39].

### 2.5.3 Sensitivity and specificity

Since the Canadian recommendation for chemoprophylaxis is a BCRAT absolute risk of breast cancer of 1.66% or higher at five-years, we calculated sensitivity and specificity using this threshold.

All statistical analyses were performed using R software, version 3.6 [40].

## 2.6 Patient and Public Involvement

Patients or the public were not involved in the design, conduct, reporting or dissemination plans of this study. However, the CARTaGENE cohort received an ethical approval from thirteen ethics committees before its development and implementation. Each ethics committee includes participants and public representatives, which had the opportunity to ask questions and make recommendations.

## 3 Results

Overall, 10,200 women were included for validating the BCRAT and IBIS scores and 4,555 women with available genotype data were selected for the validation of the PRS scores and combined scores (Figure 1). The median age was 53.1 years [quartile: 47.8-60.4] and 53.1 years [quartile 48-60.1] for the participants of CC and CGC, respectively. The median follow-up time was of 5 years in both cohorts. We observed 131 (1.28%) and 58 (1.27%) women developing a breast cancer for the CC and CGC, respectively. In total, there was 42 (0.41%) and 11 (0.24%) deaths during the five-year follow-up, for the CC and CGC, respectively. The clinical characteristics of the two cohorts can be found in the Supplementary Table S2.

### 3.1 Breast cancer risk prediction models (BCRAT and IBIS) evaluated in the clinical-based cohort

Using the BCRAT model, 19.8% of women were classified into the group with an absolute risk equal or higher than 1.66% (Figure 2A). There was a global agreement between the predicted and observed number of breast cancer incident cases, with an E/O of 1.01 [0.85-1.20]. However, the goodness of fit test for the four risk groups showed a significant difference between observed and expected values ( $p=0.0439$ ). Among the four risk groups, the E/O was significantly different from one for the average risk group (E/O: 1.51% [1.01-2.28]). There was also a slight overestimation in the high risk group (Figure 2B). This finding was in agreement with the estimate values obtained from the calibration plot with an intercept lower than zero (intercept: -1.9 [-3.4 - -0.4]) and a slope smaller than 1 (slope: 0.6 [0.2 - 0.9]). The BCRAT model had a modest discriminatory accuracy, with a c-index of 58.63 [54.05-63.21] (Figure 2C). The sensitivity and specificity for the 1.66% threshold were 23.7% [16.7-31.9] and 80.3% [79.5-81], respectively.

Using the IBIS model, 18.0% of women were classified into the group with an absolute risk higher or equal to 1.66% (Figure 2A). There was also a global agreement between the predicted and observed number of breast cancer incident cases, with an E/O of 1.02 [0.86-1.21]. However, the goodness of fit



1  
2 test for the four risk groups showed a significant difference between observed and expected values  
3  
4 ( $p=0.0056$ ). The IBIS risk prediction score overestimated the number of cases in the low risk group  
5  
6 (E/O: 2.38 [1.35-4.19]) and underestimated the number of cases in the intermediate risk group (E/O:  
7  
8 0.78 [0.63-0.97]), while the E/O were non-significant in the two higher risk groups (Figure 2B). The  
9  
10 intercept and slope were not significantly different from zero and one, respectively (0.4 [-1.3 – 2] and  
11  
12 1.1 [0.7 – 1.5], respectively). The IBIS model produced a slightly better discriminatory accuracy than  
13  
14 BCRAT, with a c-index of 63.42 [59.35-67.49] ( $p=0.013$ ) (Figure 2C). The sensitivity and specificity  
15  
16 for the 1.66% threshold were 26.7% [19.4-35.2] and 82.1% [81.3-82.8], respectively.

### 17 **3.2 Breast cancer risk prediction models (BCRAT, IBIS, PRS and combined scores)** 18 **evaluated in the clinicogenetic-based validation cohort**

19  
20  
21 Results obtained in the validation CGC cohort that included participants with all the genetic and  
22  
23 clinical information are reported in Tables 1 and 2.

24  
25 In this sub-cohort, BCRAT and IBIS models classified 21% and 18.5% of women into the two higher  
26  
27 risk groups, respectively. There was a global agreement between the predicted and observed number  
28  
29 of breast cancer cases, with an expected/observed ratio of 0.94 [0.73-1.22] and 0.94 [0.73-1.22],  
30  
31 respectively. The discriminatory accuracy of the BCRAT and IBIS models were of 59.13 [52.96-  
32  
33 65.29] and 59.63 [53.26-66], respectively.

34  
35 Using the Mavaddat, Shieh, Evans and Wacholder PRS scores, 18%, 19%, 15% and 13.5% of  
36  
37 women were classified into the group with an absolute risk equal or higher than 1.66%, respectively  
38  
39 (Supplementary Figure S1). All the PRS scores had an E/O around 0.82, with a 95%CI including one  
40  
41 (Table 1). None of the goodness of fit test showed a significant departure from the null hypothesis  
42  
43 (Figure 3). The intercepts and slopes for the calibration plot were not significantly different from zero  
44  
45 and one, respectively (Table 1).

46  
47 The PRS' c-indexes were all slightly higher than those obtained from the BCRAT and IBIS scores,  
48  
49 Wacholder score leading to the highest c-index (64.27 [58.09-70.44]). However, none of the c-  
50  
51 indexes was statistically different from the ones computed with the BCRAT and IBIS models (Table  
52  
53 1). The discrimination for women at higher risk was better for the Shieh, Evans and Mavaddat PRS  
54  
55 scores compared to BCRAT and IBIS scores (down-left corner of the ROC curves, Supplementary  
56  
57 Figure S2). Using a 1.66% threshold, all PRS scores increased both the sensitivity and the specificity  
58  
59 as compared to the BCRAT and IBIS risk prediction score (Table 1).

All the combined models (BCRAT + PRS) had an E/O around 0.84, with all 95%CI including one (Table 2). The goodness of fit test using the four risk groups showed a significant departure from the null hypothesis for the Wacholder and Evans combined models ( $p=0.0478$  and  $p=0.0471$ , respectively) (Figure 4). While the Mavaddat and Shieh combined models underestimated the number of cases in the low risk group (E/O: 0.62 [0.41-0.93] and 0.63 [0.42-0.96], respectively), the Evans and Wacholder combined models underestimated the number of cases in the intermediate risk group (E/O: 0.58 [0.39-0.85] and 0.64 [0.43-0.95], respectively). Other groups' E/O were not different from one. The Shieh combined model had an intercept and slope significantly different from zero and one, respectively (Table 2).

The combined models' c-indexes were all slightly higher than the BCRAT and IBIS scores, but none of them were statistically different from the ones computed with the BCRAT and IBIS models (Table 1). The discrimination for women at higher risk was better for the Shieh and Mavaddat combined scores (down-left corner of the ROC curves, Supplementary Figure S2). Using a 1.66% threshold, only the Evans combined model increased both the sensitivity and the specificity as compared to the BCRAT and IBIS risk prediction score (Table 2).

#### 4 Discussion

In this work, we reported the predictive performance of BCRAT, IBIS and four polygenic risk scores for predicting breast cancer occurrence within five years in a French-Canadian population. Results show that the BCRAT and IBIS models are globally well calibrated, with an E/O close to one. However, when focusing on predicted risk subgroups, the BCRAT model overestimates the number of cases in the average risk group (1.66%-3% risk) while the IBIS model was miscalibrated in the low and intermediate risk groups (below 1.66% risk). In our study, IBIS produced slightly better discrimination than BCRAT. As compared to the clinical-based models, the genetic prediction models (PRS) did not provide a significant improvement of the discriminative capacity. Adding PRS to the BCRAT scores did not significantly increase the predictive power of BCRAT.

Despite an overall good mean calibration of the BCRAT model, the calibration across risk subgroups could be improved. The analysis of the four groups of risk shows a significant difference between expected and observed cases with an over-prediction in women with a risk equal or higher than 1.66%. This finding is in accordance with previous studies [41–43]. Opposite results have also been reported in a recent large study with pooled data from two cohorts of women where the BCRAT model underestimated the risk for values between 1.7% and 3.4% [12]. However, in this latter study,



1  
2 eligible women were aged between 20 and 70 years at the enrollment and recruited since 1991, while  
3 our population was aged between 40 and 70 years and enrolled since 2009. The overestimation of the  
4 BCRAT risk prediction model for women with a risk higher than 1.66% cannot be explained by  
5 differences in age-standardized incidence rates since, based on information retrieved from national  
6 cancer databases [35,44,45], the incidence rates are comparable between the United States and  
7 Canada (250.4 [95%CI 209.0-298.3] cases per 100,000 per year for Canada and 236.8 [95%CI 235.5-  
8 238.1] for US). The IBIS model, the PRS models and the clinico-genetic model (BCRAT+PRS) had  
9 also an overall good mean calibration. However, when analyzing calibration across risk subgroups,  
10 the IBIS model had a significant goodness of fit test, with an over and underestimated the risk in the  
11 low and intermediate groups, respectively, probably explained by the United-Kingdom incidence  
12 rates used by the IBIS model. This is not the case for the PRS models but this result should be  
13 cautiously interpreted in light of the reduced number of breast cancers in the genetic cohort.  
14  
15  
16  
17  
18  
19  
20  
21  
22

23  
24 The discriminatory accuracy of the BCRAT risk prediction model is modest in our population  
25 (58.6%) but is in accordance to the meta-analysis of Wang *et al.* [7] that reported a pooled AUC  
26 close to our c-index (0.60 [0.58-0.62]). The IBIS model produced a better discrimination estimate  
27 (63.4%) than BCRAT. Since we did not collect multi-generational pedigree or *BRCAl/2* gene  
28 mutations data in our cohort, the gain in discrimination for the IBIS model as compared to BCRAT  
29 model may be linked to the non-genetic risk factors. HRT use and the menopausal status, that are risk  
30 factors for the IBIS model, are significantly associated in our series with the outcome ( $p < 0.05$ , results  
31 not shown) and may explain the gain in discriminative accuracy. It emphasizes that the inclusion of  
32 new modifiable risk factors can increase discriminatory accuracy of predictive models. The PRS and  
33 the clinico-genetic model did not provide a significantly better discrimination. This is not surprising  
34 since when combining SNPs the gains in prediction are usually small [15]. Moreover, these non-  
35 significant results should also be interpreted in light of the modest size of our cohort having genetic  
36 information and the different baseline populations used for calculating the BCRAT and the PRSs  
37 models' relative risks. It is worth noting that combining both clinical and genetic information in an  
38 oversimplified additive way has nevertheless some limitations from an explanatory point of view,  
39 even though it may lead to good predictive performance.  
40  
41  
42  
43  
44  
45  
46  
47  
48  
49  
50

51  
52 Some strengths of the present study should be highlighted. Firstly, this validation study relies on the  
53 CARTaGENE cohort, which is representative of the French-Canadian urban population of middle-  
54 aged and older adults. Moreover, the linkage with administrative health databases and the Quebec  
55  
56  
57  
58  
59  
60

1  
2 Breast Cancer Registry improved the outcome quality and accuracy, and made possible to use  
3 variables usually difficult to obtain such as the history of breast biopsy or atypical hyperplasia.  
4  
5 Secondly and to the best of our knowledge, this study is the first to evaluate the breast cancer risk  
6 assessment tools in a French-Canadian population for predicting breast cancer at five years.  
7  
8

9  
10 This study has nevertheless some limitations. Firstly, our findings may not apply to younger women  
11 under forty years old. Secondly, we have limited our study to BCRAT and IBIS risk prediction  
12 models. The main reason was that both models were well documented and implemented. The  
13 BCRAT model is used for prevention purpose with chemo-prophylaxis in the US [46,47] and is  
14 composed of clinical variables, easy to obtain in real clinical practice. The IBIS model is also  
15 implemented and can be used even with missing data such as multi-generational pedigree and  
16 *BRCAl/2* gene mutations data. Thirdly, since the genotyping information was not available for all the  
17 cohort, the number of incident cases for validating the combined scores was lower than for validating  
18 BCRAT and IBIS. Moreover, the PRS, BCRAT and IBIS models had to be evaluated on different  
19 sub-cohorts. The larger decrease of IBIS's c-index compared to BCRAT between the two cohorts  
20 might be linked to the smaller size of the clinicogenetic-based cohort as compared to the clinic-based  
21 cohort. The ethnicity differences between the two sub-cohorts could be explained by the divergent  
22 ancestry step of the quality control of genotype data. The highest breast cancer risk among genotyped  
23 women (higher age at first live birth and more relatives with breast cancer) could not be explained by  
24 the women preferentially genotyped, as they were selected for studies unrelated with breast cancers  
25 [30–32]. Even though these two sub-cohorts were similar, it would be useful to collect all genotype  
26 information for the entire cohort to validate the PRS results. Finally, regarding family history  
27 included in the IBIS model, we only had maternal and paternal history of breast cancer and maternal  
28 history of ovary cancer. However, the IBIS model can handle missing data and the performance of  
29 the model remained good without this information. Therefore, the IBIS model should be more  
30 accurate with more family history variables.  
31  
32  
33  
34  
35  
36  
37  
38  
39  
40  
41  
42  
43  
44  
45  
46

#### 47 **4.1 Conclusion**

48  
49 BCRAT and IBIS produced overall good calibration in our French-Canadian cohort but with  
50 moderate performance in terms of discriminative ability. These results are in accordance to previous  
51 validation studies. IBIS had the better discriminatory accuracy. PRS models did not significantly  
52 improve the discrimination. Despite the modest discriminatory power of BCRAT and IBIS, these  
53  
54  
55  
56  
57  
58  
59  
60

tools can be of interest for primary care physicians for delivering a personalized message to their high risk patients, regarding screening and lifestyle counseling.

## 5 Tables

**Table 1: Comparison of BCRAT, IBIS and PRS scores using the clinicogenetic-based validation cohort.**

|                                   | BCRAT model /<br>IBIS model | Mavaddat          | Shieh                   | Evans                  | Wacholder               |
|-----------------------------------|-----------------------------|-------------------|-------------------------|------------------------|-------------------------|
| <b>E/O</b>                        | 0.94 [0.73-1.22]            | 0.83 [0.65-1.08]  | 0.81 [0.63-1.05]        | 0.82 [0.63-1.06]       | 0.81 [0.62-1.04]        |
|                                   | 0.94 [0.73-1.22]            |                   |                         |                        |                         |
| <b>Goodness of fit</b>            | p=0.0415                    | p=0.0984          | p=0.1009                | p=0.1992               | p=0.2770                |
|                                   | p=268                       |                   |                         |                        |                         |
| <b>Intercept</b>                  | -2 [-4.4 - 0.2]             | -0.3 [-2.4 - 1.8] | -1 [-2.5 - 0.5]         | 1 [-1.6 - 3.6]         | 0.9 [-1.8 - 3.5]        |
|                                   | -0.8 [-3.4 - 1.8]           |                   |                         |                        |                         |
| <b>Slope</b>                      | 0.5 [0 - 1]                 | 0.9 [0.4 - 1.4]   | 0.7 [0.4 - 1.1]         | 1.2 [0.6 - 1.8]        | 1.1 [0.5 - 1.7]         |
|                                   | 0.8 [0.2 - 1.4]             |                   |                         |                        |                         |
| <b>C-index</b>                    | 59.13 [52.96-<br>65.29]     | 60.77 [53-68.53]  | 62.56 [54.54-<br>70.59] | 63.4 [56.65-<br>70.16] | 64.27 [58.09-<br>70.44] |
|                                   | 59.63 [53.26-66]            |                   |                         |                        |                         |
|                                   |                             |                   |                         |                        |                         |
| <b>C-indexes comparison with:</b> |                             |                   |                         |                        |                         |
| BCRAT model                       | -                           | p=0.72            | p=0.46                  | p=0.23                 | p=0.18                  |
| IBIS model                        | -                           | p=0.81            | p=0.57                  | p=0.34                 | p=0.26                  |
| <b>Sensitivity *</b>              | 20.7% [11.2-<br>33.4]       | 31% [19.5-44.5]   | 39.7% [27-53.4]         | 34.5% [22.5-<br>48.1]  | 25.9% [15.3-39]         |
|                                   | 24.1% [13.9-<br>37.2]       |                   |                         |                        |                         |
| <b>Specificity *</b>              | 79% [77.7-80.3]             | 82.2% [81-83.4]   | 81.3% [80.1-<br>82.5]   | 85.4% [84.2-<br>86.4]  | 86.7% [85.6-<br>87.7]   |
|                                   | 81.6% [80.4-<br>82.8]       |                   |                         |                        |                         |

BCRAT: Breast Cancer Risk Assessment Tool; E/O: expected-to-observed ratio; IBIS: International Breast Cancer Intervention Study risk evaluation tool; NRI: Net Reclassification Index

Clinicogenetic-based validation cohort: validation of the PRS models and comparison with the BCRAT and IBIS models, genotyped women with all SNPs available. 10% of the cohort was used to obtain the relative risk distribution while the remained 90% was used for computing the results.

95% confidence intervals in square brackets

\* 1.66% threshold

**Table 2: Comparison of BCRAT, IBIS and combined scores using the clinicogenetic-based validation cohort.**

|                                       | <b>BCRAT model /<br/>IBIS model</b>            | <b>Combined<br/>Mavaddat</b> | <b>Combined<br/>Shieh</b> | <b>Combined<br/>Evans</b> | <b>Combined<br/>Wacholder</b> |
|---------------------------------------|------------------------------------------------|------------------------------|---------------------------|---------------------------|-------------------------------|
| <b>E/O</b>                            | 0.94 [0.73-1.22]<br>0.94 [0.73-1.22]           | 0.86 [0.66-1.11]             | 0.83 [0.64-1.07]          | 0.83 [0.64-1.08]          | 0.82 [0.64-1.06]              |
| <b>Goodness of fit</b>                | p=0.0415<br>p=0.268                            | p=0.161                      | p=0.13                    | p=0.047                   | p=0.0475                      |
| <b>Intercept</b>                      | -2 [-4.4 - 0.2]<br>-0.8 [-3.4 - 1.8]           | - 1.5 [-3.3 - 0.1]           | -1.6 [-3 - -0.3]          | -1.2 [-3.1 - 0.6]         | -1.3 [-3.2 - 0.5]             |
| <b>Slope</b>                          | 0.5 [0 - 1]<br>0.8 [0.2 - 1.4]                 | 0.6 [0.2 - 1]                | 0.6 [0.3 - 0.9]           | 0.7 [0.3 - 1.1]           | 0.7 [0.2 - 1.1]               |
| <b>C-index</b>                        | 59.13 [52.96-<br>65.29]<br>59.63 [53.26-66]    | 61.42 [54.05-<br>68.78]      | 63.35 [55.58-<br>71.12]   | 62.69 [55.88-<br>69.50]   | 63.58 [57.46-<br>69.69]       |
| <b>C-indexes<br/>comparison with:</b> |                                                |                              |                           |                           |                               |
| BCRAT model                           | -                                              | p=0.50                       | p=0.28                    | p=0.12                    | p=0.059                       |
| IBIS model                            | -                                              | p=0.66                       | p=0.42                    | p=0.38                    | p=0.22                        |
| <b>Sensitivity *</b>                  | 20.7% [11.2-<br>33.4]<br>24.1% [13.9-<br>37.2] | 36.2% [24-49.9]              | 37.9% [25.5-<br>51.6]     | 25.9% [15.3-39]           | 22.4% [12.5-<br>35.3]         |
| <b>Specificity *</b>                  | 79% [77.7-80.3]<br>81.6% [80.4-<br>82.8]       | 80.5% [79.2-<br>81.7]        | 81.5% [80.2-<br>82.7]     | 82.1% [80.9-<br>83.3]     | 83.8% [82.6-<br>84.9]         |

BCRAT: Breast Cancer Risk Assessment Tool; E/O: expected-to-observed ratio; IBIS: International Breast Cancer Intervention Study risk evaluation tool; NRI: Net Reclassification Index

Combined scores: PRS scores combined with the BCRAT scores.

Clinicogenetic-based validation cohort: validation of the PRS models and comparison with the BCRAT and IBIS models, genotyped women with all SNPs available. 10% of the cohort was used to obtain the relative risk distribution while the remained 90% was used for computing the results.

95% confidence intervals in square brackets

\* 1.66% threshold

## 6 Figures

### Figure 1 Flow-chart

**Figure 2 Absolute risk distribution and performance of the BCRAT and IBIS models in the Clinical-based cohort.** (A) Distribution of models' predictions as a function of cumulative percentage of women. Rug plot on the y-axis. (B) Calibration according to the models' predictions groups. P values were computed using a goodness of fit test statistic compared to the critical value from the chi-squared distribution. E/O: expected-to-observed cases. (C) Discrimination power of the models according to sensitivity and specificity. C-index was calculated using the Inverse Probability of Censoring Weighting (IPCW) estimation of cumulative time-dependent ROC curve.

**Figure 3 Calibration according to BCRAT, IBIS and PRS scores' predictions groups.** PRS: polygenic risk score. E/O: expected-to-observed cases. Results from the clinicogenetic-based cohort. P values were computed using a goodness of fit test statistic compared to the critical value from the chi-squared distribution. Each PRS models name referred to the first author of the study from which the PRS were derived.

**Figure 4 Calibration according to BCRAT, IBIS and combined models' predictions groups.** PRS: polygenic risk score. E/O: expected-to-observed cases. Results from the clinicogenetic-based cohort. P values were computed using a goodness of fit test statistic compared to the critical value from the chi-squared distribution. Each PRS models name referred to the first author of the study from which the PRS were derived.

## 7 References

- 1 Canadian Cancer Statistics Advisory Committee. Canadian Cancer Statistics 2019. *Toronto, ON: Canadian Cancer Society* Published Online First: September 2019. [cancer.ca/Canadian-Cancer-Statistics-2019-EN](http://cancer.ca/Canadian-Cancer-Statistics-2019-EN) (accessed 13 Nov 2019).

- 2 Gail MH, Brinton LA, Byar DP, *et al.* Projecting Individualized Probabilities of Developing Breast Cancer for White Females Who Are Being Examined Annually. *JNCI Journal of the National Cancer Institute* 1989;**81**:1879–86. doi:10/djr43s
- 3 Tyrer J, Duffy SW, Cuzick J. A breast cancer prediction model incorporating familial and personal risk factors. *Statist Med* 2004;**23**:1111–30. doi:10.1002/sim.1668
- 4 Costantino JP, Gail MH, Pee D, *et al.* Validation studies for models projecting the risk of invasive and total breast cancer incidence. *J Natl Cancer Inst* 1999;**91**:1541–8. doi:10/ckg9vc
- 5 Gail MH, Costantino JP, Pee D, *et al.* Projecting Individualized Absolute Invasive Breast Cancer Risk in African American Women. *J Natl Cancer Inst* 2007;**99**:1782–92. doi:10/btbj9
- 6 Matsuno RK, Costantino JP, Ziegler RG, *et al.* Projecting Individualized Absolute Invasive Breast Cancer Risk in Asian and Pacific Islander American Women. *J Natl Cancer Inst* 2011;**103**:951–61. doi:10/dkmv6x
- 7 Wang X, Huang Y, Li L, *et al.* Assessment of performance of the Gail model for predicting breast cancer risk: a systematic review and meta-analysis with trial sequential analysis. *Breast Cancer Res* 2018;**20**. doi:10/gc83rw
- 8 Farkas A, Vanderberg R, Merriam S, *et al.* Breast Cancer Chemoprevention: A Practical Guide for the Primary Care Provider. *Journal of Women's Health* 2020;**29**:46–56. doi:10.1089/jwh.2018.7643
- 9 Levine M, Moutquin J-M, Walton R, *et al.* Chemoprevention of breast cancer: A joint guideline from the Canadian Task Force on Preventive Health Care and the Canadian Breast Cancer Initiative's Steering Committee on Clinical Practice Guidelines for the Care and Treatment of Breast Cancer. *CMAJ* 2001;**164**:1681–90.
- 10 Canadian Cancer Society. Reducing your risk for breast cancer. [www.cancer.ca](http://www.cancer.ca). <http://www.cancer.ca/en/cancer-information/cancer-type/breast/risks/reducing-your-risk/?region=qc> (accessed 28 Nov 2019).
- 11 Voruganti RT, O'Brien MA, Straus SE, *et al.* Primary care physicians' perspectives on computer-based health risk assessment tools for chronic diseases: a mixed methods study. *BMJ Health & Care Informatics* 2015;**22**:333–9. doi:10/ggt2c8
- 12 Terry MB, Liao Y, Whittemore AS, *et al.* 10-year performance of four models of breast cancer risk: a validation study. *The Lancet Oncology* 2019;**20**:504–17. doi:10/ggt2dp
- 13 Gail MH. Performance of BCRAT in high-risk patients with breast cancer. *The Lancet Oncology* 2019;**20**:e285. doi:10.1016/S1470-2045(19)30301-8
- 14 Terry MB, Liao Y, Hopper JL, *et al.* Performance of BCRAT in high-risk patients with breast cancer – Authors' reply. *The Lancet Oncology* 2019;**20**:e286. doi:10.1016/S1470-2045(19)30311-0
- 15 Gail MH. Discriminatory Accuracy From Single-Nucleotide Polymorphisms in Models to Predict Breast Cancer Risk. *J Natl Cancer Inst* 2008;**100**:1037–41. doi:10/ff2x2r



- 1  
2 16 Dite GS, MacInnis RJ, Bickerstaffe A, *et al.* Breast Cancer Risk Prediction Using Clinical  
3 Models and 77 Independent Risk-Associated SNPs for Women Aged Under 50 Years: Australian  
4 Breast Cancer Family Registry. *Cancer Epidemiol Biomarkers Prev* 2016;**25**:359–65.  
5 doi:10.1158/1055-9965.EPI-15-0838  
6
- 7 17 Wacholder S, Hartge P, Prentice R, *et al.* Performance of Common Genetic Variants in Breast-  
8 Cancer Risk Models. *N Engl J Med* 2010;**362**:986–93. doi:10/fn7zxw  
9
- 10 18 Mavaddat N, Pharoah PDP, Michailidou K, *et al.* Prediction of Breast Cancer Risk Based on  
11 Profiling With Common Genetic Variants. *J Natl Cancer Inst* 2015;**107**. doi:10/f3nv95  
12  
13
- 14 19 Shieh Y, Hu D, Ma L, *et al.* Breast cancer risk prediction using a clinical risk model and  
15 polygenic risk score. *Breast Cancer Res Treat* 2016;**159**:513–25. doi:10/ggt2dm  
16
- 17 20 Evans DG, Brentnall A, Byers H, *et al.* The impact of a panel of 18 SNPs on breast cancer risk in  
18 women attending a UK familial screening clinic: a case–control study. *J Med Genet*  
19 2017;**54**:111–3. doi:10/f9nd2w  
20  
21
- 22 21 MacArthur J, Bowler E, Cerezo M, *et al.* The new NHGRI-EBI Catalog of published genome-  
23 wide association studies (GWAS Catalog). *Nucleic Acids Research* 2017;**45**:D896. doi:10/f9v7cp  
24
- 25 22 Gouvernement du Québec. Québec Breast Cancer Screening Program.  
26 2018. [https://www.quebec.ca/en/health/advice-and-prevention/screening-and-carrier-testing-](https://www.quebec.ca/en/health/advice-and-prevention/screening-and-carrier-testing-offer/quebec-breast-cancer-screening-program/)  
27 [offer/quebec-breast-cancer-screening-program/](https://www.quebec.ca/en/health/advice-and-prevention/screening-and-carrier-testing-offer/quebec-breast-cancer-screening-program/) (accessed 9 Mar 2020).  
28
- 29 23 Shields M, Wilkins K. An update on mammography use in Canada. *Health Rep* 2009;**20**:7–19.  
30  
31
- 32 24 Bernatsky S, Clarke A, Ramsey-Goldman R, *et al.* Hormonal exposures and breast cancer in a  
33 sample of women with systemic lupus erythematosus. *Rheumatology (Oxford)* 2004;**43**:1178–81.  
34 doi:10/bq2cx6  
35
- 36 25 Casals F, Hodgkinson A, Hussin J, *et al.* Whole-Exome Sequencing Reveals a Rapid Change in  
37 the Frequency of Rare Functional Variants in a Founding Population of Humans. *PLoS Genet*  
38 2013;**9**:e1003815. doi:10.1371/journal.pgen.1003815  
39  
40
- 41 26 Scriver CR. Human Genetics: Lessons from Quebec Population. *Annu Rev Genom Hum Genet*  
42 2001;**2**:69–101. doi:10.1146/annurev.genom.2.1.69  
43
- 44 27 Awadalla P, Boileau C, Payette Y, *et al.* Cohort profile of the CARTaGENE study: Quebec’s  
45 population-based biobank for public health and personalized genomics. *International Journal of*  
46 *Epidemiology* 2013;**42**:1285–99. doi:10.1093/ije/dys160  
47
- 48 28 Théberge I, Institut national de santé publique du Québec, Direction systèmes de soins et  
49 services. *Validation de stratégies pour obtenir le taux de détection du cancer, la valeur*  
50 *prédictive positive, la proportion des cancers in situ, la proportion des cancers infiltrants de*  
51 *petite taille et la proportion des cancers infiltrants sans envahissement ganglionnaire dans le*  
52 *cadre des données fournies par le programme québécois de dépistage du cancer du sein*  
53 *(PQDCS). Montréal: : Direction des systèmes de soins et services, Institut national de santé*  
54 *publique* 2003.  
55  
56  
57  
58  
59  
60

- 1  
2 29 Tonelli M, Wiebe N, Fortin M, *et al.* Methods for identifying 30 chronic conditions: application  
3 to administrative data. *BMC Medical Informatics and Decision Making* 2015;**15**:31.  
4 doi:10/f698hd  
5
- 6 30 Akçimen F, Ross JP, Sarayloo F, *et al.* Genetic and epidemiological characterization of restless  
7 legs syndrome in Québec. *Sleep* 2019;**43**. doi:10.1093/sleep/zsz265  
8
- 9 31 Hodgkinson A, Idaghdour Y, Gbeha E, *et al.* High-Resolution Genomic Analysis of Human  
10 Mitochondrial RNA Sequence Variation. *Science* 2014;**344**:413–5. doi:10/ggt2b8  
11
- 12 32 Hussin JG, Hodgkinson A, Idaghdour Y, *et al.* Recombination affects accumulation of damaging  
13 and disease-associated mutations in human populations. *Nat Genet* 2015;**47**:400–4. doi:10/ggrr3s  
14
- 15 33 Zhang F. *BCRA: breast cancer risk assessment*. 2018. [https://CRAN.R-](https://CRAN.R-project.org/package=BCRA)  
16 [project.org/package=BCRA](https://CRAN.R-project.org/package=BCRA)  
17
- 18 34 Choudhury PP, Maas P, Wilcox A, *et al.* iCARE: An R package to build, validate and apply  
19 absolute risk models. *PLOS ONE* 2020;**15**:e0228198. doi:10/ggt2ch  
20
- 21 35 Statistics Canada. Table 13-10-0111-01 Number and rates of new cases of primary cancer, by  
22 cancer type, age group and sex. doi.org/10.25318/1310011101-eng (accessed 10 Nov 2019).  
23
- 24 36 Statistics Canada. Table 13-10-0392-01 Deaths and age-specific mortality rates, by selected  
25 grouped causes. <https://doi.org/10.25318/1310039201-eng> (accessed 10 Nov 2019).  
26
- 27 37 Uno H, Cai T, Tian L, *et al.* Evaluating Prediction Rules for t-Year Survivors with Censored  
28 Regression Models. *Journal of the American Statistical Association* 2007;**102**:527–37.  
29 doi:10.1198/016214507000000149  
30
- 31 38 Blanche P, Latouche A, Viallon V. Time-dependent AUC with right-censored data: a survey  
32 study. *arXiv:12106805 [statME]* Published Online First: 25 October  
33 2012.<http://arxiv.org/abs/1210.6805> (accessed 26 Sep 2017).  
34
- 35 39 Blanche P, Dartigues J-F, Jacqmin-Gadda H. Estimating and comparing time-dependent areas  
36 under receiver operating characteristic curves for censored event times with competing risks.  
37 *Statist Med* 2013;**32**:5381–97. doi:10.1002/sim.5958  
38
- 39 40 R Core Team. *R: A Language and Environment for Statistical Computing*. Vienna, Austria: : R  
40 Foundation for Statistical Computing 2020. <https://www.R-project.org/>  
41
- 42 41 Schonberg MA, Li VW, Eliassen AH, *et al.* Performance of the Breast Cancer Risk Assessment  
43 Tool Among Women Age 75 Years and Older. *JNCIJ* 2016;**108**:d1v348. doi:10/ggt2db  
44
- 45 42 Nickson C, Procopio P, Velentzis LS, *et al.* Prospective validation of the NCI Breast Cancer Risk  
46 Assessment Tool (Gail Model) on 40,000 Australian women. *Breast Cancer Res* 2018;**20**:155.  
47 doi:10/ggt2dc  
48
- 49 43 Glynn RJ, Colditz GA, Tamimi RM, *et al.* Comparison of Questionnaire-Based Breast Cancer  
50 Prediction Models in the Nurses' Health Study. *Cancer Epidemiol Biomarkers Prev*  
51 2019;**28**:1187–94. doi:10/ggt2c4  
52  
53  
54  
55  
56  
57  
58  
59



- 1  
2 44 Statistics Canada. Table 17-10-0005-01 Population estimates on July 1st, by age and sex.  
3 doi:doi.org/10.25318/1710000501-eng  
4  
5 45 U.S. Cancer Statistics Working Group. U.S. Cancer Statistics Data Visualizations Tool, based on  
6 November 2018 submission data (1999–2016): U.S. Department of Health and Human Services,  
7 Centers for Disease Control and Prevention and National Cancer Institute.  
8 2019. www.cdc.gov/cancer/dataviz (accessed 9 Oct 2019).  
9  
10  
11 46 Moyer VA. Medications for Risk Reduction of Primary Breast Cancer in Women: U.S.  
12 Preventive Services Task Force Recommendation Statement. *Ann Intern Med* Published Online  
13 First: 24 September 2013. doi:10/ggt2cx  
14  
15 47 Louro J, Posso M, Hilton Boon M, *et al.* A systematic review and quality assessment of  
16 individualised breast cancer risk prediction models. *Br J Cancer* 2019;**121**:76–85. doi:10/ggt2c3  
17

## 18 **8 Funding**

19  
20  
21 This research received no specific grant from any funding agency in the public, commercial or not-  
22 for-profit sectors.  
23  
24

## 25 **9 Competing Interests**

26  
27 The authors declare that the research was conducted in the absence of any commercial or financial  
28 relationships that could be construed as a potential conflict of interest.  
29  
30

## 31 **10 Author Contributions**

32  
33  
34 RJ: conceptualization, data curation, formal analysis, investigation, methodology, visualization,  
35 writing - original draft, writing - review & editing. YP: data curation, software, writing - review &  
36 editing. TM: data curation, software. CL: resources. NN: conceptualization, resources, writing -  
37 review & editing. PB: conceptualization, formal analysis, methodology, project administration,  
38 supervision, validation, writing - review & editing. All authors read and approved the final  
39 manuscript.  
40  
41  
42  
43  
44

## 45 **11 Data Availability Statement**

46  
47 The data that support the findings of this study are available from CARTaGENE but restrictions  
48 apply to the availability of these data. Data are however available directly from CARTaGENE  
49 (<http://cartagene.qc.ca>; [access@cartagene.qc.ca](mailto:access@cartagene.qc.ca); +1 514-345-2156).  
50  
51  
52  
53

## 54 **12 Ethics approval and consent to participate**

1  
2 This project has been approved by the Research Ethics Board of the CHU Sainte-Justine under the  
3 reference 2020-2427. In addition, CARTaGENE has obtained ethics approval by the CHU Sainte-  
4 Justine under the reference: MP-21-2011-345, 3297. The latest annual ethics renewal was granted on  
5 September 13, 2019. This latter approval implies that all participants have given their consent  
6 (cartagene.qc.ca/sites/default/files/documents/consent/brochure\_en\_0505\_0.pdf). Consent was  
7 obtained from all the participants.  
8  
9  
10  
11

### 12 13 **13 Acknowledgments**

14  
15 We would like to thank all the CARTaGENE participants for their generous investments in health  
16 research. We would also like to thank the RAMQ and the Commission d'accès à l'information (CAI)  
17 for their support in obtaining the data.  
18  
19  
20

### 21 22 **14 Supplementary Material**

#### 23 24 **Supplementary Methods**

25  
26  
27 **Supplementary Table S1: SNPs used for each extended model and the associated gene and odds**  
28 **ratio.**  
29

30  
31 **Supplementary Table S2: Characteristics comparison of the women from the Clinical-based**  
32 **and the clinicogenetic-based cohorts.**  
33  
34

35  
36 **Supplementary Figure S1: Distribution of BCRAT, IBIS, PRS and combined scores predictions**  
37 **as a function of cumulative percentage of women.** Results from the clinicogenetic-based cohort.  
38

39  
40 **Supplementary Figure S2: Discrimination power of BCRAT, IBIS, PRS scores and combined**  
41 **models according to sensitivity and specificity.** Results from the clinicogenetic-based cohort. C-  
42 indexes were calculated using the Inverse Probability of Censoring Weighting (IPCW) estimation of  
43 cumulative time-dependent ROC curve. Each PRS models name referred to the first author of the  
44 study from which the PRS were derived.  
45  
46  
47  
48  
49  
50  
51  
52  
53  
54  
55  
56  
57  
58  
59  
60

1  
2  
3  
4  
5  
6  
7  
8  
9  
10  
11  
12  
13  
14  
15  
16  
17  
18  
19  
20  
21  
22  
23  
24  
25  
26  
27  
28  
29  
30  
31  
32  
33  
34  
35  
36  
37  
38  
39  
40  
41  
42  
43  
44  
45  
46  
47  
48  
49  
50  
51  
52  
53  
54  
55  
56  
57  
58  
59  
60

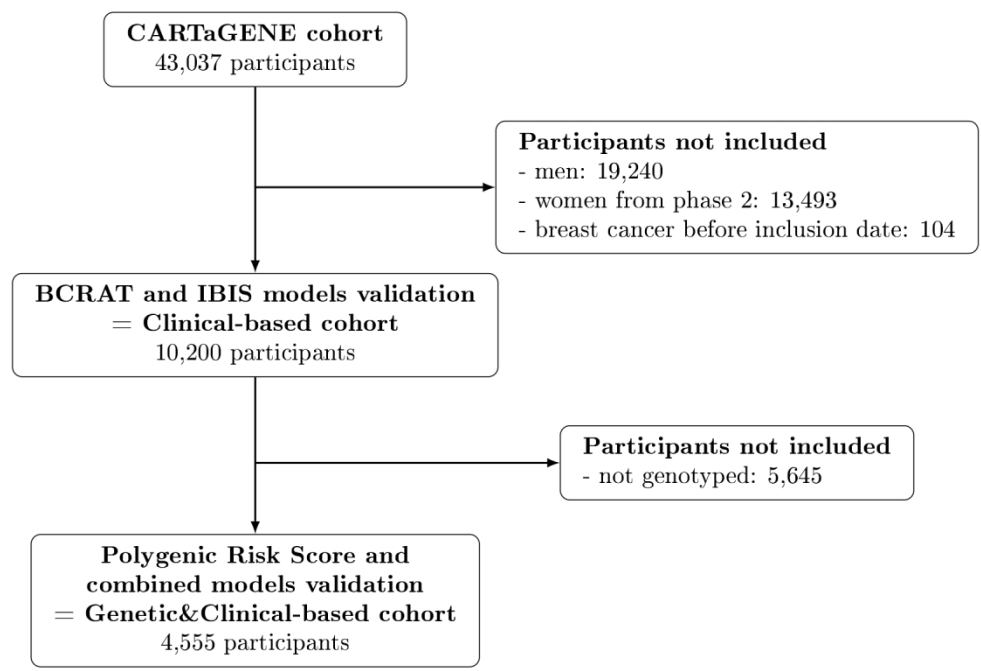

Flow-Chart

145x96mm (300 x 300 DPI)

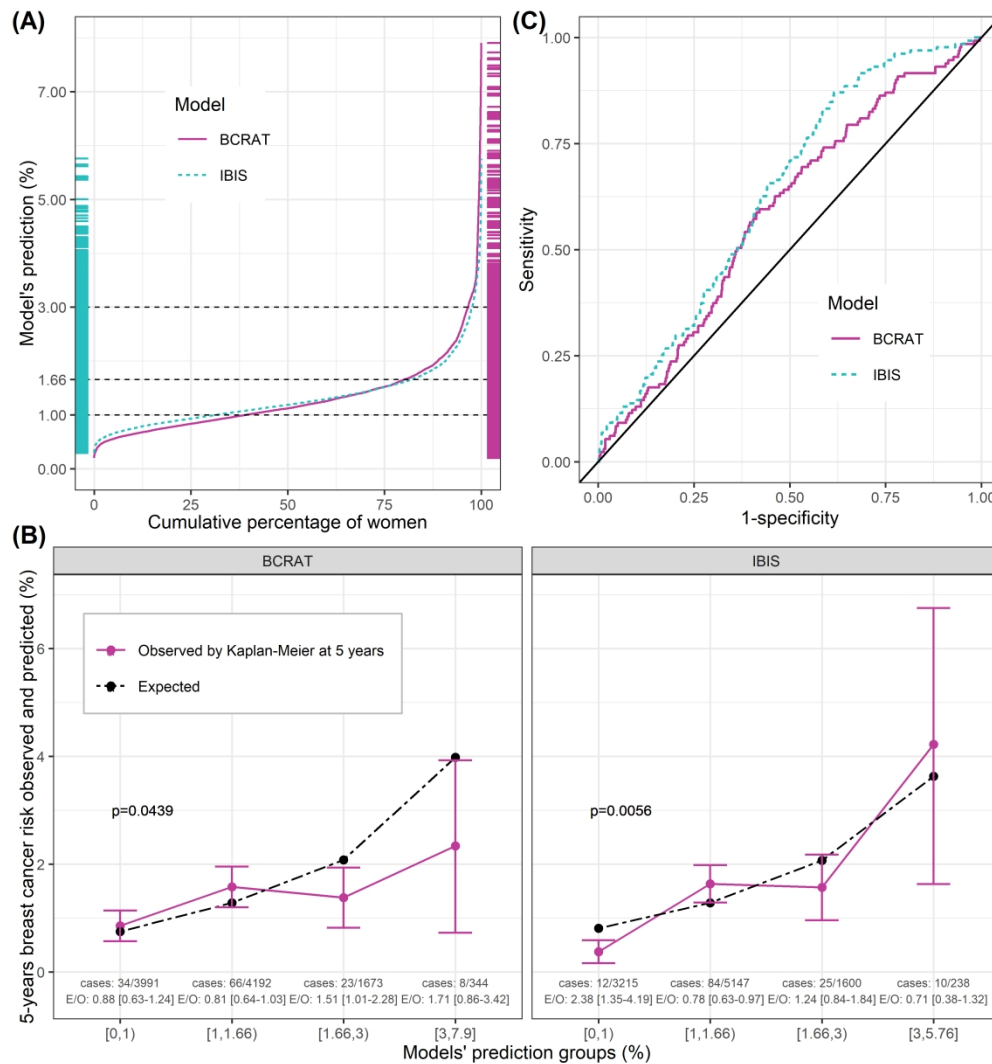

Absolute risk distribution and performance of the BCRAT and IBIS models in the Clinical-based cohort. (A) Distribution of models' predictions as a function of cumulative percentage of women. Rug plot on the y-axis. (B) Calibration according to the models' predictions groups. P values were computed using a goodness of fit test statistic compared to the critical value from the chi-squared distribution. E/O: expected-to-observed cases. (C) Discrimination power of the models according to sensitivity and specificity. C-index was calculated using the Inverse Probability of Censoring Weighting (IPCW) estimation of cumulative time-dependent ROC curve.

169x179mm (600 x 600 DPI)

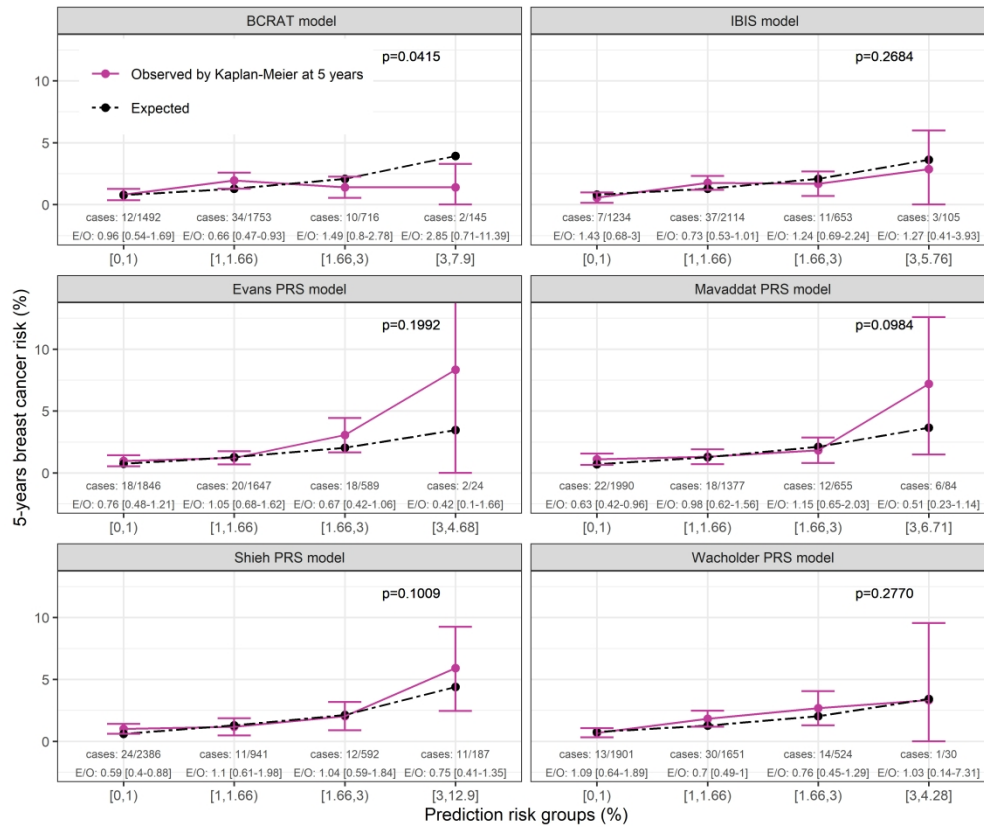

Calibration according to BCRAT, IBIS and PRS scores' predictions groups. PRS: polygenic risk score. E/O: expected-to-observed cases. Results from the clinicogenetic-based cohort. P values were computed using a goodness of fit test statistic compared to the critical value from the chi-squared distribution. Each PRS models name referred to the first author of the study from which the PRS were derived.

179x149mm (600 x 600 DPI)

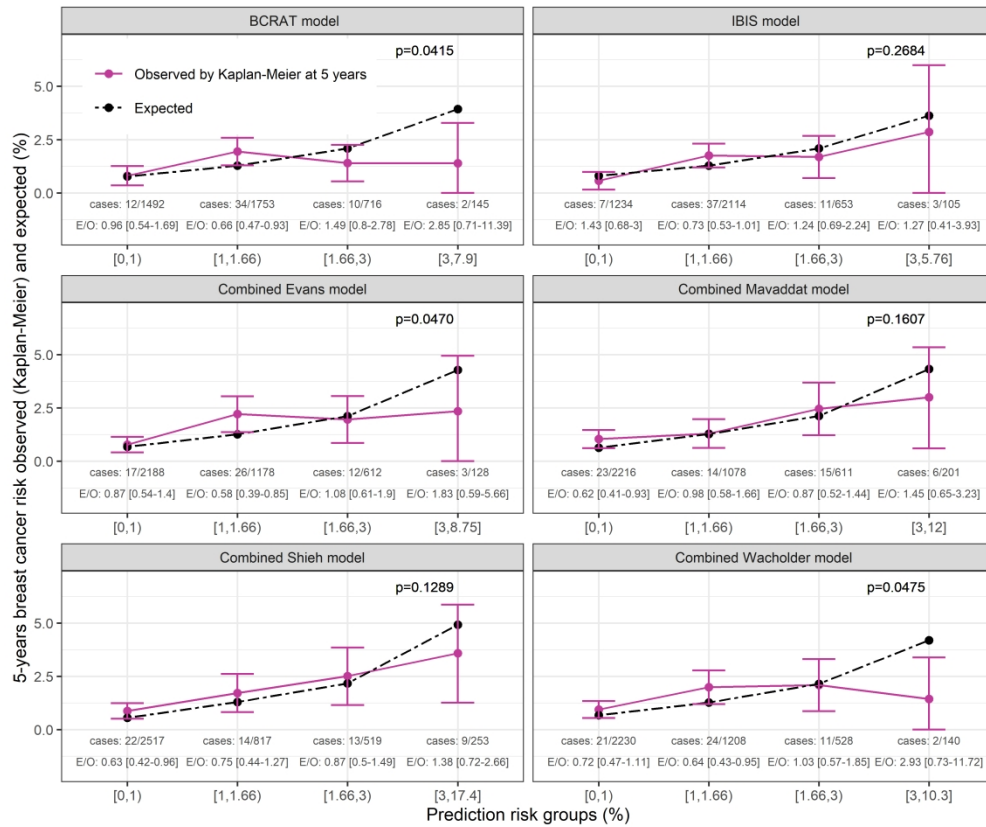

Calibration according to BCRAT, IBIS and combined models' predictions groups. PRS: polygenic risk score. E/O: expected-to-observed cases. Results from the clinicogenetic-based cohort. P values were computed using a goodness of fit test statistic compared to the critical value from the chi-squared distribution. Each PRS models name referred to the first author of the study from which the PRS were derived.

179x149mm (600 x 600 DPI)

1  
2  
3  
4  
5  
6  
7  
8  
9  
10  
11  
12  
13  
14  
15  
16  
17  
18  
19  
20  
21  
22  
23  
24  
25  
26  
27  
28  
29  
30  
31  
32  
33  
34  
35  
36  
37  
38  
39  
40  
41  
42  
43  
44  
45  
46  
47  
48  
49  
50  
51  
52  
53  
54  
55  
56  
57  
58  
59  
60

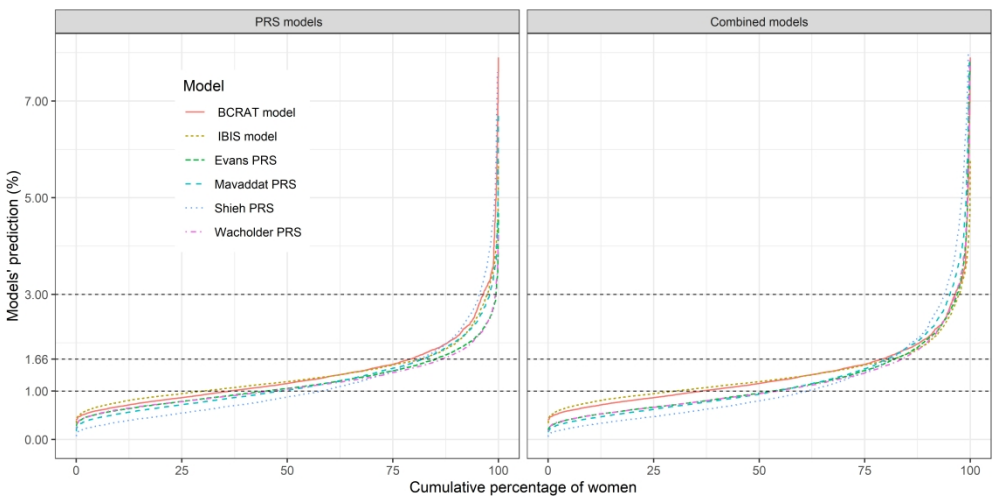

254x127mm (600 x 600 DPI)

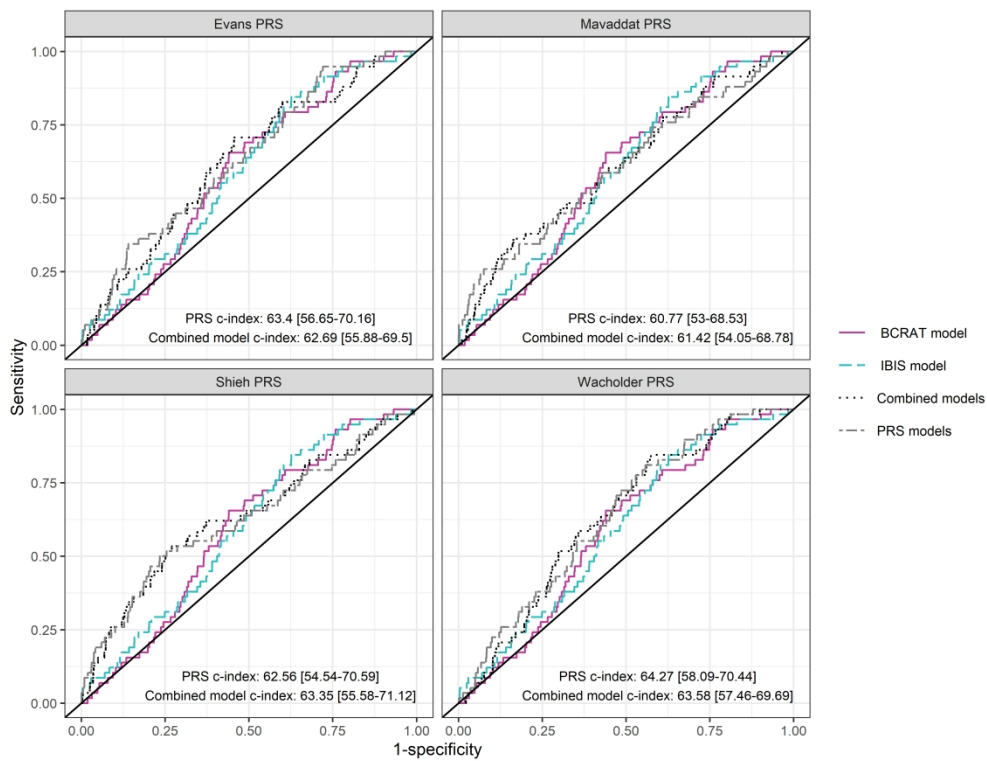

186x142mm (600 x 600 DPI)



# Supplementary Methods

## Health databases

For identifying participants who had breast cancer, we used two administrative health databases (AHD): 1) the MED-ÉCHO AHD: this database contains all the Quebec Health Insurance Board (RAMQ) diagnoses, hospitalizations and physician claims of insured patients (about 98% of Quebec residents [1]), excluding private healthcare; in the case of cancers, all patients are treated in the public sector. Data were available from January 1<sup>st</sup>, 1998 to March 31<sup>st</sup>, 2016. Dates of death were also retrieved from the RAMQ; 2) the Quebec Breast Cancer Registry: it contains information about the Quebec Breast Cancer Screening Program, such as mammograms' results and breast cancers histological confirmation. Data were available from May 15<sup>th</sup>, 1998 to December 31<sup>st</sup>, 2017.

## References

- 1 RAMQ. Table PA.01 - Nombre de personnes inscrites et admissibles au régime d'assurance maladie du Québec selon le sexe, le groupe d'âge et la région sociosanitaire. 2017. [https://www4.prod.ramq.gouv.qc.ca/IST/CD/CDF\\_DifsnInfoStats/CDF1\\_CnsullInfoStatsCNC\\_iut/DifsnInfoStats.aspx?ETAPE\\_COUR=3&IdPatronRapp=8&Annee=2017&Per=0&LANGUE=en-CA](https://www4.prod.ramq.gouv.qc.ca/IST/CD/CDF_DifsnInfoStats/CDF1_CnsullInfoStatsCNC_iut/DifsnInfoStats.aspx?ETAPE_COUR=3&IdPatronRapp=8&Annee=2017&Per=0&LANGUE=en-CA) (accessed 25 Nov 2019).

## Genetic data

Genotypes were included in the CaG database and were obtained from hybridation upon three different chips: Illumina Omni 2.5M (7.7% of the participants), Affymetrix Axiom UK biobank (8.2%) and Illumina Infinium Global Screening Array (84.1%). A quality control (QC) was made before the imputation (detailed pipeline can be found at [www.cartagene.qc.ca/info-genetic-data](http://www.cartagene.qc.ca/info-genetic-data)): 1) QC sample: for replicated samples, samples with the lowest call rates were removed. Sample with a call rate below 95% were removed. Samples pairs with an identity by state (IBS) higher than 0.20 and similar to at least 50% of the whole set were removed. Then, for pair of samples with an IBS higher than 0.85, when the correct sample could not be identified with certainty, both samples of the pair were removed. Samples with discrepancy between sex chromosome genotypes and reported

1  
2  
3 gender were removed. 2) QC SNP: SNPs with a call rate lower than 95% or deviating from  
4 Hardy–Weinberg equilibrium (with a  $10^{-6}$  threshold) were removed.  
5  
6  
7  
8

9 For the imputation, data were prepared using the Will Rayner toolbox  
10 ([www.well.ox.ac.uk/~wrayner/tools/](http://www.well.ox.ac.uk/~wrayner/tools/)) with the Haplotype Reference Consortium (HRC) as  
11 reference panel [1]. To impute missing SNPs of our cohort, we used the Michigan Imputation  
12 Server with the Minimac4 algorithm [2], with separate chromosomes and chips. Imputation  
13 reference panel was the HRC r1.1 2016 European population, and the phasing was made  
14 with Eagle v2.4 [3]. A total of 39,131,578 SNPs were retrieved.  
15  
16  
17  
18  
19  
20  
21  
22  
23

24 After imputation and after merging chromosomes, we used men and women to perform a  
25 sample QC based on the Anderson *et al.* protocole [4]: samples with a call rate lower than  
26 95% and an heterozygosity higher than 3 standard deviation were removed. After LD  
27 pruning (window size: 50kb; step size: 5 variants; pairwise  $r^2$  threshold: 0.2), for pair of  
28 participants with an IBS higher than 0.1875, the sample with the lowest call rate was  
29 removed. To remove samples with divergent ancestries, we used the two first principal  
30 components with the HapMap phase III reference panel. As we would like to have all SNPs  
31 available for calculating PRS, we did not perform an additional SNPs QC. QC process was  
32 performed using PLINK v1.90b6.2 and v2.00a2LM 64-bit ([5,6]; URL:  
33 [pngu.mgh.harvard.edu/purcell/plink/](http://pngu.mgh.harvard.edu/purcell/plink/)).  
34  
35  
36  
37  
38  
39  
40  
41  
42  
43  
44  
45  
46

## 47 References

- 49 1. the Haplotype Reference Consortium, McCarthy S, Das S, Kretzschmar W, Delaneau O,  
50 Wood AR, et al. A reference panel of 64,976 haplotypes for genotype imputation. *Nat*  
51 *Genet.* 2016;48:1279.
- 52 2. Das S, Forer L, Schönherr S, Sidore C, Locke AE, Kwong A, et al. Next-generation  
53 genotype imputation service and methods. *Nat Genet.* 2016;48(10):1284–7.
- 54 3. Loh P-R, Danecek P, Palamara PF, Fuchsberger C, A Reshef Y, K Finucane H, et al.  
55 Reference-based phasing using the Haplotype Reference Consortium panel. *Nat Genet.*  
56 2016;48(11):1443–8.
- 57 4. Anderson CA, Pettersson FH, Clarke GM, Cardon LR, Morris AP, Zondervan KT. Data  
58 quality control in genetic case-control association studies. *Nat Protoc.* 2010  
59 Sep;5(9):1564–73.  
60

5. Purcell S, Neale B, Todd-Brown K, Thomas L, Ferreira MAR, Bender D, et al. PLINK: a tool set for whole-genome association and population-based linkage analyses. *Am J Hum Genet.* 2007 Sep;81(3):559–75.
6. Chang CC, Chow CC, Tellier LC, Vattikuti S, Purcell SM, Lee JJ. Second-generation PLINK: rising to the challenge of larger and richer datasets. *GigaScience.* 2015 Dec;4(1):7.

## Absolute risk of breast cancer

The absolute risk of breast cancer over an established period  $[t_0, t_1]$  (five years in this study) is the probability that a woman who is free of a breast cancer at age  $t_0$  and has a risk score  $S$  will be diagnosed with breast cancer over the period  $[t_0, t_1]$ .

Under the assumption of a multiplicative proportional hazard model (or Cox model), this latter conditional probability (denoted  $AR(t_0, t_1; S)$ ) can be written such as:

$$AR(t_0, t_1; S) = \int_{t_0}^{t_1} \lambda_0(t) e^S \exp \left[ - \int_{t_0}^t \lambda_0(u) e^S + \gamma(u) du \right] dt$$

where  $\lambda_0(t)$  and  $\gamma(t)$  are the baseline age-specific hazard rate for breast cancer and the age-specific mortality hazard rate from other causes (competing risks), respectively. In practice, the absolute risk is computed using piece-wise constant hazard rates.

These baseline hazard rates are calculated using marginal (or composite) hazard rates obtained from registries, together with either the attributable hazard function or the risk factor distribution.

In this work, the timescale of the analyses was age of an individual so that  $t_0$  was the age of a woman at entry into the cohort and  $t_1$  was the age five years later.

For the IBIS model, the baseline age-specific hazard rate for breast cancer is replaced by a hazard rate estimate obtained from the segregation model conditionally on the woman's family history.

## Variables extraction and coding

Age at inclusion was calculated using the birthdate. We retrieved from the CARTaGENE questionnaire the first menstrual period, first live birth, number of first-degree relatives with breast cancer, ethnicity, menopause occurrence and age at menopause, height, weight, hormonal replacement therapy (HRT) use, length of HRT and last HRT use. If first menstrual period occurred after first live birth, both were considered as missing. We retrieved from the Quebec Breast Cancer Registry the previous breast biopsy and the number of biopsy with hyperplasia, atypical hyperplasia and lobular carcinoma *in situ*. We retrieved from the RAMQ the occurrence and age of ovary cancers.

1  
2  
3  
4  
5 How the variables were coded for the IBIS model can be found online

6 (<https://ems-trials.org/riskevaluator/>), in the Documentation section, file “Risk program input  
7  
8 file format (v6-8)”  
9  
10  
11  
12  
13  
14  
15  
16  
17  
18  
19  
20  
21  
22  
23  
24  
25  
26  
27  
28  
29  
30  
31  
32  
33  
34  
35  
36  
37  
38  
39  
40  
41  
42  
43  
44  
45  
46  
47  
48  
49  
50  
51  
52  
53  
54  
55  
56  
57  
58  
59  
60

Supplementary Table S1

|    | snp        | id*          | genes                   | wacholder** | evans | mavaddat | shieh | shieh_asian*** |
|----|------------|--------------|-------------------------|-------------|-------|----------|-------|----------------|
| 4  | rs13387042 | 2:217905832  | AC007749.1 - RN7SKP43   | 0.8/0.7     | 0,88  | 0,88     | 0,88  | 1,06           |
| 5  | rs1045485  | 2:202149589  | -                       | 0.89/0.69   | -     | 0,96     | -     | -              |
| 6  | rs999737   | 14:69034682  | RAD51B                  | 0.91/0.67   | -     | 0,92     | 0,92  | 0,93           |
| 7  | rs3817198  | 11:1909006   | LSP1                    | 1.04/1.18   | -     | 1,07     | 1,07  | 1,07           |
| 8  | rs889312   | 5:56031884   | C5orf67 - AC008940.1    | 1.05/1.1    | 1,12  | 1,12     | 1,12  | 1,05           |
| 9  | rs7716600  | 5:44875005   | AC093297.2 - AC114954.1 | 1.11/1.46   | -     | -        | -     | -              |
| 10 | rs13281615 | 8:128355618  | CASC8, POU5F1B, PCAT1   | 1.14/1.36   | -     | 1,09     | 1,09  | 1,03           |
| 11 | rs3803662  | 16:52586341  | CASC16                  | 1.16/1.44   | 1,23  | 1,23     | 1,24  | 1,15           |
| 12 | rs2981582  | 10:123352317 | FGFR2                   | 1.18/1.6    | -     | -        | -     | -              |
| 13 | rs11249433 | 1:121280613  | EMBP1                   | 1.23/1.3    | 1,09  | 1,10     | 1,09  | 1,16           |
| 14 | rs10995190 | 10:64278682  | AC024598.1, ZNF365      |             | 0,86  | 0,86     | 0,86  | 0,94           |
| 15 | rs1562430  | 8:128387852  | POU5F1B, CASC8, PCAT1   |             | 0,90  | -        | 1,16  | 1,16           |
| 16 | rs909116   | 11:1941946   | TNNT3                   |             | 0,93  | -        | -     | -              |
| 17 | rs1156287  | 17:53076799  | -                       |             | 0,93  | -        | -     | -              |
| 18 | rs713588   | 10:5886962   | -                       |             | 1,01  | -        | -     | -              |
| 19 | rs8009944  | 14:69039588  | -                       |             | 1,04  | -        | -     | -              |
| 20 | rs10931936 | 2:202143928  | -                       |             | 1,04  | -        | -     | -              |
| 21 | rs1011970  | 9:22062134   | CDKN2B-AS1              |             | 1,05  | 1,05     | 1,06  | 1,06           |
| 22 | rs704010   | 10:80841148  | ZMIZ1                   |             | 1,09  | 1,07     | 1,08  | 1,05           |
| 23 | rs4973768  | 3:27416013   | SLC4A7                  |             | 1,09  | 1,09     | 1,10  | 1,11           |
| 24 | rs9790879  | 5:44899885   | -                       |             | 1,09  | -        | -     | -              |
| 25 | rs3757318  | 6:151914113  | CCDC170                 |             | 1,16  | -        | 1,16  | 1,16           |
| 26 | rs614367   | 11:69328764  | LINC01488 - CCND1       |             | 1,21  | -        | 1,21  | 1,29           |
| 27 | rs2981579  | 10:123337335 | FGFR2                   |             | 1,27  | 1,25     | 1,27  | 1,27           |
| 28 | rs10771399 | 12:28155080  | PTHLH - CCDC91          |             | -     | 0,86     | 0,86  | 1,15           |
| 29 | rs865686   | 9:110888478  | CHCHD4P2 - AL353742.1   |             | -     | 0,90     | 0,89  | 1,04           |
| 30 | rs6828523  | 4:175846426  | ADAM29                  |             | -     | 0,91     | 0,90  | 1,11           |
| 31 | rs17356907 | 12:96027759  | PGAM1P5                 |             | -     | 0,91     | 0,91  | 1,08           |
| 32 | rs6472903  | 8:76230301   | CASC9                   |             | -     | 0,91     | 0,91  | 1,16           |
| 33 | rs4849887  | 2:121245122  | LINC01101 - AC073257.2  |             | -     | 0,92     | 0,91  | 1,07           |
| 34 | rs1353747  | 5:58337481   | AC092343.1, PDE4D       |             | -     | 0,92     | 0,92  | 1,00           |
| 35 | rs1292011  | 12:115836522 | AC078880.2 - AC009803.2 |             | -     | 0,92     | 0,92  | 1,11           |
| 36 | rs2236007  | 14:37132769  | PAX9                    |             | -     | 0,92     | 0,93  | 1,09           |
| 37 | rs2823093  | 21:16520832  | AF127577.5 - AF246928.1 |             | -     | 0,93     | 0,92  | 1,08           |
| 38 | rs17817449 | 16:53813367  | FTO                     |             | -     | 0,93     | 0,93  | 1,09           |
| 39 | rs6504950  | 17:53056471  | STXBP4                  |             | -     | 0,93     | 0,94  | 1,02           |
| 40 | rs4808801  | 19:18571141  | ELL                     |             | -     | 0,93     | 1,08  | 1,04           |
| 41 | rs2736108  | 5:1297488    | TERT - MIR4457          |             | -     | 0,94     | 0,94  | 0,94           |
| 42 | rs11242675 | 6:1318878    | FOXQ1 - LINC01394       |             | -     | 0,94     | 0,94  | 0,99           |
| 43 | rs616488   | 1:10566215   | PEX14                   |             | -     | 0,94     | 0,94  | 1,06           |
| 44 | rs11199914 | 10:123093901 | LINC01153 - RN7SKP167   |             | -     | 0,94     | 0,95  | 1,03           |
| 45 | rs3903072  | 11:65583066  | AP001266.1 - CFL1       |             | -     | 0,94     | 0,95  | 1,05           |
| 46 | rs1550623  | 2:174212894  | AC092573.2              |             | -     | 0,94     | 1,06  | 1,21           |
| 47 | rs720475   | 7:144074929  | ARHGEF5                 |             | -     | 0,95     | 0,94  | 1,02           |
| 48 | rs1436904  | 18:24570667  | CHST9, AQP4-AS1         |             | -     | 0,95     | 0,96  | 1,02           |
| 49 | rs2016394  | 2:172972971  | DLX2-DT                 |             | -     | 0,95     | -     | -              |
| 50 | rs527616   | 18:24337424  | AQP4-AS1                |             | -     | 0,96     | 0,95  | 1,03           |
| 51 | rs11820646 | 11:129461171 | AP003500.2              |             | -     | 0,96     | 0,95  | 1,05           |

Supplementary Table S1

|    |             |              |                            |   |      |      |      |
|----|-------------|--------------|----------------------------|---|------|------|------|
| 1  |             |              |                            |   |      |      |      |
| 2  |             |              |                            |   |      |      |      |
| 3  |             |              |                            |   |      |      |      |
| 4  | rs2380205   | 10:5886734   | GDI2 - ANKRD16             | - | 0,98 | 0,94 | 1,02 |
| 5  | rs6678914   | 1:202187176  | LGR6                       | - | 0,99 | 0,91 | 1,10 |
| 6  | rs10069690  | 5:1279790    | TERT                       | - | 1,02 | 1,06 | 1,05 |
| 7  | rs75915166  | 11:69379161  | LINC01488 - CCND1          | - | 1,02 | 1,31 | 1,00 |
| 8  | rs12422552  | 12:14413931  | GNAI2P1 - RPL30P11         | - | 1,03 | 1,05 | 1,05 |
| 9  | rs4245739   | 1:204518842  | MDM4                       | - | 1,03 | 1,14 | 1,14 |
| 10 | rs8170      | 19:17389704  | USHBP1, AC010463.1, BABAM1 | - | 1,03 | 1,15 | 1,00 |
| 11 | rs2363956   | 19:17394124  | ANKLE1                     | - | 1,03 | -    | -    |
| 12 | rs10472076  | 5:58184061   | AC008852.1 - PDE4D         | - | 1,04 | 1,05 | 1,02 |
| 13 | rs12710696  | 2:19320803   | LINC01376                  | - | 1,04 | 1,10 | 1,10 |
| 14 | rs11075995  | 16:53855291  | FTO                        | - | 1,04 | 1,11 | 1,11 |
| 15 | rs7726159   | 5:1282319    | TERT                       | - | 1,04 | -    | -    |
| 16 | rs9790517   | 4:106084778  | TET2                       | - | 1,05 | 1,05 | 1,02 |
| 17 | rs204247    | 6:13722523   | RANBP9 - MCUR1             | - | 1,05 | 1,05 | 1,03 |
| 18 | rs10759243  | 9:110306115  | PPIAP88 - RNU6-996P        | - | 1,05 | 1,06 | 1,05 |
| 19 | rs12493607  | 3:30682939   | TGFBR2                     | - | 1,05 | 1,06 | 1,05 |
| 20 | rs2046210   | 6:151948366  | CCDC170 - ESR1             | - | 1,05 | 1,15 | 1,27 |
| 21 | rs17529111  | 6:82128386   | AL590824.1 - TENT5A        | - | 1,05 | -    | -    |
| 22 | rs7904519   | 10:114773927 | TCF7L2                     | - | 1,06 | 1,06 | 1,02 |
| 23 | rs3760982   | 19:44286513  | KCNN4 - LYPD5              | - | 1,06 | 1,06 | 1,02 |
| 24 | rs941764    | 14:91841069  | CCDC88C                    | - | 1,06 | 1,06 | 1,05 |
| 25 | rs7072776   | 10:22032942  | MLLT10 - DNAJC1            | - | 1,06 | 1,07 | 1,04 |
| 26 | rs11780156  | 8:129194641  | PVT1                       | - | 1,07 | 1,07 | 1,00 |
| 27 | rs6762644   | 3:4742276    | ITPR1                      | - | 1,07 | 1,07 | 1,03 |
| 28 | rs9693444   | 8:29509616   | RPL17P33 - LINC00589       | - | 1,07 | 1,07 | 1,08 |
| 29 | rs1432679   | 5:158244083  | EBF1                       | - | 1,07 | 1,07 | 1,09 |
| 30 | rs2588809   | 14:68660428  | RAD51B                     | - | 1,07 | 1,08 | 1,06 |
| 31 | rs16857609  | 2:218296508  | DIRC3                      | - | 1,07 | 1,08 | 1,07 |
| 32 | rs11552449  | 1:114448389  | DCLRE1B                    | - | 1,08 | 1,07 | 1,03 |
| 33 | rs13329835  | 16:80650805  | CDYL2                      | - | 1,08 | 1,08 | 1,02 |
| 34 | rs132390    | 22:29621477  | EMID1                      | - | 1,11 | 1,12 | 1,00 |
| 35 | rs10941679  | 5:44706498   | AC093292.1 - RN7SL383P     | - | 1,12 | 1,13 | 1,08 |
| 36 | rs554219    | 11:69331642  | LINC01488 - CCND1          | - | 1,12 | 1,27 | 1,00 |
| 37 | rs6001930   | 22:40876234  | MRTFA                      | - | 1,13 | 1,12 | 1,03 |
| 38 | rs2943559   | 8:76417937   | HNF4G                      | - | 1,13 | 1,13 | 0,96 |
| 39 | rs12662670  | 6:151918856  | CCDC170                    | - | 1,14 | -    | -    |
| 40 | rs78540526  | 11:69331418  | LINC01488 - CCND1          | - | 1,18 | -    | -    |
| 41 | rs11814448  | 10:22315843  | DNAJC1 - ADIPOR1P1         | - | 1,22 | 1,26 | 1,08 |
| 42 | rs11571833  | 13:32972626  | BRCA2                      | - | 1,26 | 1,26 | 1,00 |
| 43 | rs17879961  | 22:29121087  | CHEK2                      | - | 1,36 | 1,36 | 1,00 |
| 44 | rs140068132 | 6:151954834  | CCDC170 - ESR1             | - | -    | 0,60 | 1,00 |
| 45 | rs10822013  | 10:64251977  | AC024598.1, ZNF365         | - | -    | 0,89 | 1,08 |
| 46 | rs9485372   | 6:149608874  | TAB2                       | - | -    | 0,90 | 1,11 |
| 47 | rs10474352  | 5:90732225   | ARRDC3-AS1                 | - | -    | 0,92 | 1,09 |
| 48 | rs2290203   | 15:91512067  | PRC1, AC068831.7, PRC1-AS1 | - | -    | 0,93 | 1,08 |
| 49 | rs17530068  | 6:82193109   | AL590824.1 - TENT5A        | - | -    | 1,05 | 1,05 |
| 50 | rs9383938   | 6:151987357  | ESR1                       | - | -    | 1,08 | 1,08 |
| 51 | rs4951011   | 1:203766331  | ZBED6, ZC3H11A             | - | -    | 1,09 | 1,09 |
| 52 | rs2284378   | 20:32588095  | RALY                       | - | -    | 1,10 | 1,10 |
| 53 |             |              |                            |   |      |      |      |
| 54 |             |              |                            |   |      |      |      |
| 55 |             |              |                            |   |      |      |      |
| 56 |             |              |                            |   |      |      |      |
| 57 |             |              |                            |   |      |      |      |
| 58 |             |              |                            |   |      |      |      |
| 59 |             |              |                            |   |      |      |      |
| 60 |             |              |                            |   |      |      |      |

## Supplementary Table S1

|           |             |                        |   |   |      |      |
|-----------|-------------|------------------------|---|---|------|------|
| rs2392780 | 8:128388025 | POU5F1B, CASC8, PCAT1  | - | - | 1,15 | 1,00 |
| rs4415084 | 5:44662515  | LINC02224 - AC093292.1 | - | - | 1,17 | 1,00 |
| rs3822625 | 5:56178111  | MAP3K1                 | - | - | 1,36 | 1,36 |
| rs7726354 | 5:56256483  | MIER3                  | - | - | 1,37 | 1,37 |

\* SNPs' position were based on build GRCh37/hg19

\*\* OR for one allele/two alleles

\*\*\* OR from Shieh's study used for Asian women

For peer review only

Supplementary Table S1

For peer review only

1  
2  
3  
4  
5  
6  
7  
8  
9  
10  
11  
12  
13  
14  
15  
16  
17  
18  
19  
20  
21  
22  
23  
24  
25  
26  
27  
28  
29  
30  
31  
32  
33  
34  
35  
36  
37  
38  
39  
40  
41  
42  
43  
44  
45  
46  
47  
48  
49  
50  
51  
52  
53  
54  
55  
56  
57  
58  
59  
60



**Table S2**

|                                            | <b>Clinical-based cohort</b> | <b>Clinicogenetic-based cohort</b> |
|--------------------------------------------|------------------------------|------------------------------------|
|                                            | <b>N=10,200</b>              | <b>N=4,555</b>                     |
| Breast cancer within 5 years               | 131 (1.28%)                  | 58 (1.27%)                         |
| BCRAT absolute risk (%)                    | 1.30 (0.74)                  | 1.33 (0.73)                        |
| IBIS absolute risk (%)                     | 1.31 (0.59)                  | 1.33 (0.60)                        |
| Age at baseline (years)                    | 54.1 (7.7)                   | 54.1 (7.6)                         |
| Age categories:                            |                              |                                    |
| <=49                                       | 3,556 (34.9%)                | 1,557 (34.2%)                      |
| 50-59                                      | 3,980 (39.0%)                | 1,839 (40.4%)                      |
| >=60                                       | 2,664 (26.1%)                | 1,159 (25.4%)                      |
| Birth province:                            |                              |                                    |
| In Canada outside Quebec                   | 333 (3.3%)                   | 74 (1.6%)                          |
| Outside Canada                             | 1,490 (14.6%)                | 189 (4.1%)                         |
| Quebec                                     | 8,373 (82.1%)                | 4,292 (94.2%)                      |
| Missing                                    | 4                            | 0                                  |
| Ethnicity:                                 |                              |                                    |
| Asian                                      | 188 (1.8%)                   | 5 (0.1%)                           |
| Black African                              | 182 (1.8%)                   | 0 (0.0%)                           |
| Hispanic non-american                      | 234 (2.3%)                   | 1 (<0.1%)                          |
| Other                                      | 542 (5.3%)                   | 86 (1.9%)                          |
| White/European                             | 9,054 (88.8%)                | 4,463 (98.0%)                      |
| Age at menarche (years):                   |                              |                                    |
| <=11                                       | 2,305 (22.9%)                | 1,027 (22.7%)                      |
| 12-13                                      | 4,754 (47.2%)                | 2,166 (47.9%)                      |
| >=14                                       | 3,021 (30.0%)                | 1,331 (29.4%)                      |
| Missing                                    | 120                          | 31                                 |
| Age at first live birth (years):           |                              |                                    |
| <=19                                       | 1,124 (13.1%)                | 422 (11.1%)                        |
| 20-24                                      | 2,955 (34.5%)                | 1,324 (34.8%)                      |
| 25-29                                      | 2,814 (32.9%)                | 1,312 (34.5%)                      |
| >=30                                       | 1,621 (19.0%)                | 734 (19.3%)                        |
| Nulliparous                                | 40 (0.5%)                    | 14 (0.4%)                          |
| Missing                                    | 1,646                        | 749                                |
| First-degree relatives with breast cancer: |                              |                                    |
| 0                                          | 8,945 (87.7%)                | 3,949 (86.7%)                      |
| 1                                          | 1,130 (11.1%)                | 556 (12.2%)                        |
| >=2                                        | 125 (1.23%)                  | 50 (1.10%)                         |
| Previous breast biopsy:                    |                              |                                    |
| 0                                          | 10,023 (98.3%)               | 4,463 (98.0%)                      |

|                                 |                                       |                  |                  |
|---------------------------------|---------------------------------------|------------------|------------------|
|                                 | 1                                     | 134 (1.31%)      | 71 (1.56%)       |
|                                 | >=2                                   | 43 (0.42%)       | 21 (0.46%)       |
| History of hyperplasia          |                                       | 6 (0.06%)        | 1 (0.02%)        |
| History of atypical hyperplasia |                                       | 1 (0.56%)        | 0 (0.00%)        |
| Lobular Carcinoma In Situ       |                                       | 0                | 0                |
| Weight (Kg)                     |                                       | 67.4 [59.4;78.0] | 66.8 [59.6;76.8] |
| Height (m)                      |                                       | 1.61 [1.57;1.65] | 1.61 [1.57;1.65] |
| History of ovary cancer         |                                       | 94 (0.92%)       | 46 (1.01%)       |
| Menopause occurrence            |                                       |                  |                  |
|                                 | Pre-menopausal                        | 4176 (40.9%)     | 1891 (41.5%)     |
|                                 | Post-menopausal                       | 5885 (57.7%)     | 2617 (57.5%)     |
|                                 | Unknown                               | 139 (1.36%)      | 47 (1.03%)       |
| Use of HRT                      |                                       |                  |                  |
|                                 | Never                                 | 7477 (73.3%)     | 3249 (71.3%)     |
|                                 | Previous user (more than 5 years ago) | 1126 (11.0%)     | 506 (11.1%)      |
|                                 | Previous user (less than 5 years ago) | 1285 (12.6%)     | 646 (14.2%)      |
|                                 | Current user                          | 312 (3.06%)      | 154 (3.38%)      |
| HRT length of use (years)       |                                       | 0.00 [0.00;1.00] | 0.00 [0.00;1.00] |
| Last HRT use (years)            |                                       | 0.00 [0.00;0.00] | 0.00 [0.00;0.00] |
| Mother history of breast cancer |                                       | 832 (8.16%)      | 412 (9.05%)      |
| Mother history of ovary cancer  |                                       | 114 (1.12%)      | 60 (1.32%)       |
| Father history of breast cancer |                                       | 8 (0.08%)        | 2 (0.04%)        |

HRT: hormonal replacement therapy; PRS: polygenic risk score; clinical-based cohort: validation of the BCRAT and IBIS models, included women with a BCRAT and an IBIS score; clinicogenetic-based cohort: validation of the PRS models and comparison with the BCRAT and IBIS models, genotyped women with all SNPs available.

\* Not available for the phase 2

## As this is a validation study, the STROBE checklist is not fully adapted.

STROBE Statement—Checklist of items that should be included in reports of *cohort studies*

|                           | Item No | Recommendation                                                                                                                                                                                    | Page number |
|---------------------------|---------|---------------------------------------------------------------------------------------------------------------------------------------------------------------------------------------------------|-------------|
| <b>Title and abstract</b> | 1       | (a) Indicate the study's design with a commonly used term in the title or the abstract                                                                                                            | 1           |
|                           |         | (b) Provide in the abstract an informative and balanced summary of what was done and what was found                                                                                               | 1-2         |
| <b>Introduction</b>       |         |                                                                                                                                                                                                   |             |
| Background /rationale     | 2       | Explain the scientific background and rationale for the investigation being reported                                                                                                              | 3-5         |
| Objectives                | 3       | State specific objectives, including any prespecified hypotheses                                                                                                                                  | 5           |
| <b>Methods</b>            |         |                                                                                                                                                                                                   |             |
| Study design              | 4       | Present key elements of study design early in the paper                                                                                                                                           | 5-6         |
| Setting                   | 5       | Describe the setting, locations, and relevant dates, including periods of recruitment, exposure, follow-up, and data collection                                                                   | 5           |
| Participants              | 6       | (a) Give the eligibility criteria, and the sources and methods of selection of participants. Describe methods of follow-up                                                                        | 6           |
|                           |         | (b) For matched studies, give matching criteria and number of exposed and unexposed                                                                                                               | -           |
| Variables                 | 7       | Clearly define all outcomes, exposures, predictors, potential confounders, and effect modifiers. Give diagnostic criteria, if applicable                                                          | 7-8         |
| Data sources/ measurement | 8*      | For each variable of interest, give sources of data and details of methods of assessment (measurement). Describe comparability of assessment methods if there is more than one group              | 7-8         |
| Bias                      | 9       | Describe any efforts to address potential sources of bias                                                                                                                                         | 5           |
| Study size                | 10      | Explain how the study size was arrived at                                                                                                                                                         | 6           |
| Quantitative variables    | 11      | Explain how quantitative variables were handled in the analyses. If applicable, describe which groupings were chosen and why                                                                      | 7-8         |
| Statistical methods       | 12      | (a) Describe all statistical methods, including those used to control for confounding                                                                                                             | 8-9         |
|                           |         | (b) Describe any methods used to examine subgroups and interactions                                                                                                                               | -           |
|                           |         | (c) Explain how missing data were addressed                                                                                                                                                       | 7           |
|                           |         | (d) If applicable, explain how loss to follow-up was addressed                                                                                                                                    | 8-9         |
|                           |         | (e) Describe any sensitivity analyses                                                                                                                                                             | -           |
| <b>Results</b>            |         |                                                                                                                                                                                                   |             |
| Participants              | 13*     | (a) Report numbers of individuals at each stage of study—eg numbers potentially eligible, examined for eligibility, confirmed eligible, included in the study, completing follow-up, and analysed | 9           |
|                           |         | (b) Give reasons for non-participation at each stage                                                                                                                                              | 9           |
|                           |         | (c) Consider use of a flow diagram                                                                                                                                                                | Figure 1    |
| Descriptive data          | 14*     | (a) Give characteristics of study participants (eg demographic, clinical, social) and information on exposures and potential confounders                                                          | Table S2    |
|                           |         | (b) Indicate number of participants with missing data for each variable of                                                                                                                        | Table S2    |

|                          |     |                                                                                                                                                                                                              |          |
|--------------------------|-----|--------------------------------------------------------------------------------------------------------------------------------------------------------------------------------------------------------------|----------|
|                          |     | interest                                                                                                                                                                                                     |          |
|                          |     | (c) Summarise follow-up time (eg, average and total amount)                                                                                                                                                  | 9        |
| Outcome data             | 15* | Report numbers of outcome events or summary measures over time                                                                                                                                               | 9        |
| Main results             | 16  | (a) Give unadjusted estimates and, if applicable, confounder-adjusted estimates and their precision (eg, 95% confidence interval). Make clear which confounders were adjusted for and why they were included | 10-12    |
|                          |     | (b) Report category boundaries when continuous variables were categorized                                                                                                                                    | Table S2 |
|                          |     | (c) If relevant, consider translating estimates of relative risk into absolute risk for a meaningful time period                                                                                             | 9        |
| Other analyses           | 17  | Report other analyses done—eg analyses of subgroups and interactions, and sensitivity analyses                                                                                                               | 10-12    |
| <b>Discussion</b>        |     |                                                                                                                                                                                                              |          |
| Key results              | 18  | Summarise key results with reference to study objectives                                                                                                                                                     | 12       |
| Limitations              | 19  | Discuss limitations of the study, taking into account sources of potential bias or imprecision. Discuss both direction and magnitude of any potential bias                                                   | 13       |
| Interpretation           | 20  | Give a cautious overall interpretation of results considering objectives, limitations, multiplicity of analyses, results from similar studies, and other relevant evidence                                   | 12-13    |
| Generalisability         | 21  | Discuss the generalisability (external validity) of the study results                                                                                                                                        | 13       |
| <b>Other information</b> |     |                                                                                                                                                                                                              |          |
| Funding                  | 22  | Give the source of funding and the role of the funders for the present study and, if applicable, for the original study on which the present article is based                                                | 21       |

\*Give information separately for exposed and unexposed groups.

**Note:** An Explanation and Elaboration article discusses each checklist item and gives methodological background and published examples of transparent reporting. The STROBE checklist is best used in conjunction with this article (freely available on the Web sites of PLoS Medicine at <http://www.plosmedicine.org/>, Annals of Internal Medicine at <http://www.annals.org/>, and Epidemiology at <http://www.epidem.com/>). Information on the STROBE Initiative is available at <http://www.strobe-statement.org>.

# BMJ Open

## Validation of breast cancer risk assessment tools on a French-Canadian population-based cohort

|                                 |                                                                                                                                                                                                                                                                                                                                                         |
|---------------------------------|---------------------------------------------------------------------------------------------------------------------------------------------------------------------------------------------------------------------------------------------------------------------------------------------------------------------------------------------------------|
| Journal:                        | <i>BMJ Open</i>                                                                                                                                                                                                                                                                                                                                         |
| Manuscript ID                   | bmjopen-2020-045078.R2                                                                                                                                                                                                                                                                                                                                  |
| Article Type:                   | Original research                                                                                                                                                                                                                                                                                                                                       |
| Date Submitted by the Author:   | 17-Feb-2021                                                                                                                                                                                                                                                                                                                                             |
| Complete List of Authors:       | Jantzen, Rodolphe; CHU Sainte-Justine, Centre de recherche Payette, Yves; CHU Sainte-Justine Centre de Recherche de Malliard, Thibault; CHU Sainte-Justine Centre de Recherche Labbé, Catherine; CHU Sainte-Justine Centre de Recherche Noisel, Nolwenn; CHU Sainte-Justine Centre de Recherche Broët, Philippe; CHU Sainte-Justine Centre de Recherche |
| <b>Primary Subject Heading</b>: | Public health                                                                                                                                                                                                                                                                                                                                           |
| Secondary Subject Heading:      | Epidemiology, Genetics and genomics, Oncology                                                                                                                                                                                                                                                                                                           |
| Keywords:                       | Breast tumours < ONCOLOGY, EPIDEMIOLOGY, GENETICS, PREVENTIVE MEDICINE, PUBLIC HEALTH                                                                                                                                                                                                                                                                   |
|                                 |                                                                                                                                                                                                                                                                                                                                                         |

SCHOLARONE™  
Manuscripts



I, the Submitting Author has the right to grant and does grant on behalf of all authors of the Work (as defined in the below author licence), an exclusive licence and/or a non-exclusive licence for contributions from authors who are: i) UK Crown employees; ii) where BMJ has agreed a CC-BY licence shall apply, and/or iii) in accordance with the terms applicable for US Federal Government officers or employees acting as part of their official duties; on a worldwide, perpetual, irrevocable, royalty-free basis to BMJ Publishing Group Ltd ("BMJ") its licensees and where the relevant Journal is co-owned by BMJ to the co-owners of the Journal, to publish the Work in this journal and any other BMJ products and to exploit all rights, as set out in our [licence](#).

The Submitting Author accepts and understands that any supply made under these terms is made by BMJ to the Submitting Author unless you are acting as an employee on behalf of your employer or a postgraduate student of an affiliated institution which is paying any applicable article publishing charge ("APC") for Open Access articles. Where the Submitting Author wishes to make the Work available on an Open Access basis (and intends to pay the relevant APC), the terms of reuse of such Open Access shall be governed by a Creative Commons licence – details of these licences and which [Creative Commons](#) licence will apply to this Work are set out in our licence referred to above.

Other than as permitted in any relevant BMJ Author's Self Archiving Policies, I confirm this Work has not been accepted for publication elsewhere, is not being considered for publication elsewhere and does not duplicate material already published. I confirm all authors consent to publication of this Work and authorise the granting of this licence.

# Validation of breast cancer risk assessment tools on a French-Canadian population-based cohort

Rodolphe Jantzen<sup>1,2,\*</sup>, Yves Payette<sup>1</sup>, Thibault de Malliard<sup>1</sup>, Catherine Labbé<sup>1</sup>, Nolwenn Noisel<sup>1,2</sup>, Philippe Broët<sup>1,2,3,4,\*</sup>

<sup>1</sup>CARTaGENE, Research Center, CHU Sainte-Justine, Montreal, Quebec, Canada

<sup>2</sup>Université de Montréal, Montréal, Québec, Canada

<sup>3</sup>University Paris-Saclay, CESP, INSERM, Villejuif, France

<sup>4</sup>Assistance Publique-Hôpitaux de Paris (AP-HP), Hôpitaux Universitaires Paris-Sud, Hôpital Paul Brousse, 12 Avenue Paul Vaillant Couturier, 94807 Villejuif, France

## \* Correspondence:

Rodolphe Jantzen, rodolphe.jantzen@gmail.com

Philippe Broët, philippe.broet@umontreal.ca

**Keywords:** Breast cancer, Validation Study, Clinical Decision Rules, Polygenic risk score, BCRAT, IBIS

## Abstract

**Objectives:** Evaluate the accuracy of the Breast Cancer Risk Assessment Tool (BCRAT), International Breast Cancer Intervention Study risk evaluation tool (IBIS), polygenic risk scores (PRS) and combined scores (BCRAT+PRS and IBIS+PRS) to predict the occurrence of invasive breast cancers at five years in a French-Canadian population.

**Design:** Population-based cohort study.

1  
2 **Setting:** We used the population-based cohort CARTaGENE, composed of 43,037 Quebec residents  
3 aged between 40 and 69 years and broadly representative of the population recorded on the Quebec  
4 administrative health insurance registries.  
5  
6

7  
8 **Participants:** 10,200 women recruited in 2009-2010 were included for validating BCRAT and IBIS  
9 and 4,555 with genetic information for validating the PRS and combined scores.  
10  
11

12 **Outcome measures:** We computed the absolute risks of breast cancer at five years using BCRAT,  
13 IBIS, four published PRS and combined models. We reported the overall calibration performance,  
14 goodness-of-fit test and discriminatory accuracy.  
15  
16  
17

18 **Results:** 131 (1.28%) women developed a breast cancer at five years for validating BCRAT and IBIS  
19 and 58 (1.27%) for validating PRS and combined scores. Median follow-up was 5 years. BCRAT and  
20 IBIS had an overall expected-to-observed ratio of 1.01 [0.85-1.19] and 1.02 [0.86-1.21] but with  
21 significant differences when partitioning by risk groups ( $p < 0.05$ ). IBIS' c-index was significantly  
22 higher than BCRAT (63.42 [59.35-67.49] versus 58.63 [54.05-63.21],  $p = 0.013$ ). PRS scores had a  
23 global calibration around 0.82, with a confidence interval including one, and non-significant  
24 goodness-of-fit tests. PRS' c-indexes were non-significantly higher than BCRAT and IBIS, the  
25 highest being 64.43 [58.23-70.63]. Combined models did not improve the results.  
26  
27  
28  
29  
30  
31  
32

33 **Conclusions:** In this French-Canadian population-based cohort, BCRAT and IBIS have good mean  
34 calibration that could be improved for risk subgroups, and modest discriminatory accuracy. Despite  
35 this modest discriminatory power, these tools can be of interest for primary care physicians for  
36 delivering a personalized message to their high risk patients, regarding screening and lifestyle  
37 counseling.  
38  
39  
40  
41  
42

### 43 **Strengths and limitations of this study**

44

- 45 • First study to evaluate risk assessment tools in a French-Canadian population for predicting  
46 breast cancer.  
47
- 48 • Population based-cohort representative of the French-Canadian urban population of middle-  
49 aged and older adults.  
50  
51  
52  
53  
54  
55  
56  
57  
58  
59  
60



- Linkage with administrative health databases and the Quebec Breast Cancer Registry, which improved the outcome quality and accuracy, and made possible to use variables usually difficult to obtain.
- May not apply to younger women under forty years old.
- Since the genotyping information was not available for all the cohort, the models had to be evaluated on two different sub-cohorts.

## 1 Introduction

Breast cancer is the most frequently diagnosed cancer and the second leading cause of death by cancer among the Canadian women [1]. However, assessing the individual risk of breast cancer remains a challenge. In this context, risk prediction models have been developed and implemented. The two most widely used are the Breast Cancer Risk Assessment Tool (BCRAT) and the International Breast Cancer Intervention Study risk evaluation tool (IBIS) [2,3].

The National Cancer Institute's BCRAT was developed by Dr. Mitchell Gail in 1989 using 5,998 American women from a case-control study [2]. It provides an estimate of a woman's risk of developing invasive breast cancer over a specific period, knowing her personal risk factors. After its first release, this model has been validated in an American cohort [4], mainly composed of white women, and was later calibrated for African American, Hispanic, Asian and Pacific Islander women [5,6]. The most recent version uses six clinical risk factors: current age, age at first menstrual period, age at first live birth, number of first-degree relatives with breast cancer, history of previous breast biopsy and ethnicity. Several studies have assessed or updated the BCRAT model to specific populations (e.g., Asian, Oceanian) [7]. It is worth noting that this model, designed for use in the general population, is not intended to be used for women carrying inherited *BRCA1/2* mutations. The BCRAT model is used to guide physicians on breast cancer prevention strategies. As an example, the U.S. Food and Drug Administration recommended to consider chemo-prevention for women at high risk of breast cancer (i.e. a 5-year risk equal or higher than 1.66%), while the U.S. Preventive Services Task Force recommended chemo-prevention for a risk equal or higher than 3% [8]. The Canadian Task Force, as well as the Canadian Cancer Society, used a threshold of 1.66% [9,10]. Despite its implementation on the NCI's website ([bcrisktool.cancer.gov/](http://bcrisktool.cancer.gov/)), the lack of recent Canadian guidelines combined with its U.S.-centered use led to an under-use of the BCRAT model by Canadian primary care physicians. Indeed, a recent qualitative study showed that two-third of

1  
2 primary care physicians from two Canadian provinces (Ontario and Alberta) were unaware of the  
3 BCRAT tool [11].  
4

5  
6 The International Breast Cancer Intervention Study model (IBIS, also known as the Tyrer-Cuzick  
7 model) is also a widely used breast cancer risk prediction model, which takes into account multi-  
8 generational family history data and *BRCA1/2* mutation information. It has been developed with data  
9 from the International Breast Cancer Intervention Study including a cohort of daughters of patients  
10 diagnosed with the disease and has focused on the estimation of breast cancer lifetime risks through  
11 the analysis of family history, reproductive and hormonal factors, and individual characteristics [3].  
12 The IBIS model takes into account non-genetic risk factors (current age, age at menarche, number  
13 of live births, age at first live birth, age at menopause, height, weight, history of hyperplasia, breast  
14 density, history and age of ovarian cancer, hormone replacement therapy) together with multi-  
15 generational pedigree information and *BRCA1/2* gene mutations. IBIS can be used even for women  
16 without a family history of breast cancer and without *BRCA1/2* gene mutations information. A recent  
17 study suggested that IBIS has better ability to assess breast cancer risk than BCRAT but with close  
18 performance in women not known to have mutations in *BRCA1* or *BRCA2* gene mutation [12–14].  
19  
20  
21  
22  
23  
24  
25  
26  
27  
28  
29

30 With the increasing availability and affordability of genetic information, there is a growing interest to  
31 incorporate individual-level genotype data into risk prediction models for increasing their  
32 discriminatory accuracy. The integration of such information into the BCRAT model has already  
33 been performed with the addition of seven SNPs associated with breast cancer. Results showed that  
34 the performance of the predicted breast cancer's risk was slightly improved, with an area under the  
35 ROC curve (AUC) increasing from 0.607 to 0.632 [15]. This kind of clinico-genetic model has also  
36 been done with IBIS leading to an improvement in the discriminative ability [16]. Alongside these  
37 works, many genetic-based or “polygenic risk scores” (PRS) have been published for breast cancer  
38 prediction. Most of them rely upon linear combinations of the risk-conferring variant alleles weighted  
39 by their effect sizes [17–20]. The list of these risk alleles with their corresponding weights is usually  
40 obtained from large case-control genome-wide association studies (GWAS) [21], with weights that  
41 can be adapted to specific ethnicities [19]. The predictive accuracy of these PRSs compared to  
42 classical prediction models, such as the BCRAT and IBIS, should now be evaluated in various  
43 populations.  
44  
45  
46  
47  
48  
49  
50  
51  
52  
53

54  
55 In Quebec, the Breast Cancer Screening Program consists of a mammogram every two years for  
56 women aged 50 to 69 [22]. Although this screening decreased the number of deaths from breast  
57  
58  
59

1  
2 cancer [23], it could be stressful with non-negligible costs for the public health system. In this  
3 context, risk assessment tools could be helpful for primary care physicians to enhance screening  
4 uptake among high risk patients who are less likely to participate in organized screening. Some  
5 previous studies have assessed the accuracy of the BCRAT risk predictions in Canadian women  
6 [12,24], but they were limited to specific ethnic populations or were part of multi-countries cohorts.  
7 The fact that BCRAT and IBIS have not been evaluated in the French-Canadian population, which  
8 has specific genetic patterns, as compared to the general European population [25,26], with lifestyle  
9 risk factors (e.g., nutrition) that are at the intersection between North America and Europe, prompted  
10 us to evaluate their predictive abilities in the population-based cohort CARTaGENE from Quebec.  
11  
12  
13  
14  
15  
16  
17

18 In this study, we report the predictive accuracies of the BCRAT model, the IBIS model and  
19 polygenic risk scores to predict the occurrence of invasive breast cancers at five years in middle-aged  
20 and older French-Canadian women.  
21  
22  
23

## 24 **2 Materials and methods**

### 25 **2.1 Design and participants selection**

26  
27  
28  
29  
30 The CARTaGENE population-based cohort is composed of 43,037 Quebec residents aged between  
31 40 and 69 years, recruited during two phases (2009-2010 and 2013-2014). With a rich collection of  
32 data including phenotyping and genotyping data, CARTaGENE is the largest ongoing prospective  
33 population cohort and biobank in Québec, Canada [27]. Details on recruitment and sample selection  
34 have been described previously [27].  
35  
36  
37  
38

39  
40 To comprehensively identify participants with an invasive breast cancer and the incidence date, we  
41 used two administrative health databases, the Quebec Health Insurance Board (RAMQ) and the  
42 Quebec Breast Cancer Registry (see Supplementary Methods), and an algorithm based on a previous  
43 report from the *Institut National de Santé Publique du Québec* (INSPQ) [28] and the Tonelli *et al.*  
44 algorithm [29]. Using the Breast Cancer Registry, we retrieved the incidence date of histologically  
45 confirmed breast cancers. Then, as some women with a breast cancer might not have a histologically  
46 confirmed cancers in the Breast Cancer Registry, we selected in this registry all women having an  
47 abnormal mammography (i.e., lesion suspected of malignancy) without histologically confirmed  
48 breast cancers and retrieved, when available, the incidence date after the abnormal mammography  
49 from the RAMQ database for women with at least two claims in two years or one hospitalization  
50 with the appropriate International Classification of Diseases (ICD), Ninth or Tenth Revision codes  
51  
52  
53  
54  
55  
56  
57  
58  
59

(174 and C50). The Quebec breast cancer registry's data were available from May 15<sup>th</sup>, 1998 to December 31<sup>st</sup>, 2017, while the RAMQ's data were available from January 1<sup>st</sup>, 1998 to March 31<sup>st</sup>, 2016. Adherence to mammography was not available.

For this study, we have considered the women without a breast cancer before the inclusion date from the CARTaGENE first phase of recruitment as the family history of breast cancer was not available for the participants of the phase 2. Recruitment was unrelated to the last mammography screening. The validation of the BCRAT and IBIS models was done on the sub-cohort of 10,200 women with available information for computing the BCRAT and IBIS models (hereinafter referred as clinical-based cohort (CC)). The validation of the PRS was done on the sub-cohort of 4,555 women with available genotyping information (hereinafter referred as clinicogenetic-based cohort (CGC)) (Figure 1). We also compared PRS to the BCRAT and IBIS models on the CGC cohort.

## 2.2 Genetic data

Only a fraction of the CARTaGENE population cohort has been genotyped. These participants were selected to be genotyped through various scientific projects unrelated to breast cancer [30–32]. Single-nucleotide polymorphism (SNP) positions were based on build GRCh37/hg19. The detailed pipeline about quality control and imputation can be found at [www.cartagene.qc.ca/info-genetic-data](http://www.cartagene.qc.ca/info-genetic-data) and in the Supplementary Methods.

## 2.3 Outcome

The outcome of interest was the time of occurrence of the breast cancer from the enrollment in the cohort. Patients without breast cancer occurrence were censored at the end of the five-years study period (administrative censoring) or at death.

## 2.4 Predictive scores

### 2.4.1 Absolute risk using the BCRAT and the IBIS models

The absolute risk of breast cancer estimated by BCRAT and IBIS is calculated using baseline hazard functions calculated from the marginal hazard functions (United States and United Kingdom incidence rates, respectively), and the attributable risk obtained from the United States population data (BCRAT) and the United Kingdom/Swedish population data (IBIS). In this article, the BCRAT and IBIS absolute risks of breast cancer at five years were calculated for each woman at the inclusion date using the National Institutes of Health R package “BCRA”, version 2.1 [33] and the latest

1  
2 version of the “IBIS Breast Cancer Risk Evaluation Tool” (<http://www.ems-trials.org/riskevaluator/>  
3 — version 8.0b, September 2017), respectively. Death as a competing risk was taken into account for  
4 both models.  
5  
6

7  
8 All variables of the BCRAT model could be retrieved, while some variables of the IBIS model were  
9 not available and were considered missing: breast density, Ashkenazi Jewish heritage, HRT type,  
10 length of time woman intends to use HRT in the future, *BRCA1/2* genetic testing (participant and  
11 relatives), mother bilateral mastectomy, relatives’ age of breast and ovary cancers, variables related  
12 to each sister, brother, grandmother, aunt, uncle and daughter. See Supplementary Methods for  
13 information about variables extraction and coding. Missing data can be handled in both BCRAT and  
14 IBIS models.  
15  
16  
17  
18  
19

#### 20 21 **2.4.2 Absolute risk using PRS**

22  
23 For estimating the absolute risk of breast cancer using PRS, we have considered the procedure  
24 implemented in the iCARE package [34]. It requires the marginal (composite) rates for breast cancer  
25 and death, obtained here from Canada Health [35,36], and the relative risk distribution, obtained from  
26 the sampling at random of 10% of the individuals from the clinicogenetic-based cohort with small  
27 probability weights for the breast cancer cases. We reported the results obtained using the 90%  
28 remaining (hereinafter referred as “validation CGC”).  
29  
30  
31  
32  
33

34  
35 In this study, woman’s genotyping information were used for computing four different published  
36 PRS: Wacholder *et al.* [17] (10 SNPs), Mavaddat *et al.* [18] (77 SNPs), Shieh *et al.* [19] (86 SNPs)  
37 and Evans *et al.* [20] (18 SNPs). In the following, each PRS is referred to the name of the first author  
38 of the study. The SNPs and associated odds ratio can be found as Supplementary Table S1.  
39  
40  
41

#### 42 43 **2.4.3 Absolute risk using a combination of BCRAT and PRS**

44  
45 For estimating the absolute risk of breast cancer with a combination of BCRAT and PRS (hereinafter  
46 referred as “combined scores”), we summed the PRS and BCRAT scores (relative hazard regression  
47 scores), and used the same procedure as described in the section “Absolute risk using PRS”.  
48  
49  
50

#### 51 52 **2.4.4 Absolute risk using a combination of IBIS and PRS**

53  
54 As the clinical risk score obtained from the IBIS model is not an output of the software, we cannot  
55 estimate the absolute risk associated with a combination of the IBIS clinical risk score and PRS using  
56 the iCARE package in the same way we did for BCRAT (see above). In practice, the version 8.0b of  
57  
58  
59

1  
2 the IBIS risk evaluation tool allows to compute the absolute risk by incorporating the PRS scores, but  
3 these absolute risks are different from the ones that would be obtained with the iCARE package.  
4 Keeping in mind this issue, we have used the IBIS breast cancer risk evaluation tool and incorporate  
5 the PRS scores. More precisely, and for taking into account the distribution of the PRS, we  
6 incorporated a shifted PRS that corresponds to the PRS minus the logarithm of the expected value of  
7 the relative risk associated to the PRS in our population. This latter transformation is due to the fact  
8 that the baseline hazard rate can be approximated by the composite hazard divided by the expected  
9 value of the relative risk score in the underlying population ([34]).  
10  
11  
12  
13  
14  
15

## 16 17 **2.5 Statistical analysis**

18  
19 For comparing means between groups, we used a one-way ANOVA test. Relationships between  
20 categorical variables were tested using the  $\chi^2$  test. Statistical significance was considered as P-values  
21 less than 0.05. We plotted predictiveness curves (i.e., the risk quantile against the corresponding  
22 cumulative proportion of the population with risks below this quantile) with rug plots.  
23  
24  
25  
26

27 To assess the performance of the BCRAT, IBIS and PRS procedures for predicting invasive breast  
28 cancer risk, we reported calibration performance and discriminatory accuracy (see hereafter). We  
29 also reported the results obtained with the BCRAT and IBIS procedures in the validation CGC.  
30  
31  
32

### 33 **2.5.1 Calibration**

34  
35 We computed the expected-to-observed ratio (E/O), with the 95% confidence interval (95%CI), from  
36 the sum of the estimated risk divided by the number of observed cases. An E/O of 1 corresponds to  
37 perfect global calibration. We reported the intercept and slope estimates from logistic regression  
38 models (observed outcomes with the logit of the predicted probabilities as the independent variable).  
39  
40  
41  
42

43 We also compared the predicted and observed proportion of breast cancers in four absolute risk  
44 groups: <1% (low risk),  $\geq 1\%$  and <1.66% (intermediate risk),  $\geq 1.66\%$  and <3% (average risk),  $\geq 3\%$   
45 (high risk). The observed proportion at five-year in each risk group was calculated using a Kaplan-  
46 Meier estimator. To test the null hypothesis of a global agreement between the observed and  
47 expected values across these groups, we computed a global test statistic ( $G = \sum(O_i - E_i)^2 / E_i$ ) where  
48  $O_i$  and  $E_i$  are respectively the observed and expected number of events in group  $i$ , and compared this  
49 latter to the critical value from the chi-squared distribution with four degrees of freedom.  
50  
51  
52  
53  
54  
55  
56  
57  
58  
59  
60



## 2.5.2 Discrimination

The global discrimination was assessed by the c-statistic with an Inverse Probability of Censoring Weighting (IPCW) estimation of cumulative time-dependent ROC curve with their 95%CI [37–39]. Receiver operating characteristic (ROC) curves were plotted.

In the validation CGC, the c-indexes calculated with the BCRAT and IBIS scores were compared with those calculated with each PRS scores by using the independent and identically distributed-representation of the c-index estimators [39].

## 2.5.3 Sensitivity and specificity

Since the Canadian recommendation for chemoprophylaxis is a BCRAT absolute risk of breast cancer of 1.66% or higher at five-years, we calculated sensitivity and specificity using this threshold.

All statistical analyses were performed using R software, version 3.6 [40].

## 2.6 Patient and Public Involvement

Patients or the public were not involved in the design, conduct, reporting or dissemination plans of this study. However, the CARTaGENE cohort received an ethical approval from thirteen ethics committees before its development and implementation. Each ethics committee includes participants and public representatives, which had the opportunity to ask questions and make recommendations.

## 3 Results

Overall, 10,200 women were included for validating the BCRAT and IBIS scores and 4,555 women with available genotype data were selected for the validation of the PRS scores and combined scores (Figure 1). The median age was 53.1 years [quartile: 47.8-60.4] and 53.1 years [quartile 48-60.1] for the participants of CC and CGC, respectively. The median follow-up time was of 5 years in both cohorts. We observed 131 (1.28%) and 58 (1.27%) women developing a breast cancer for the CC and CGC, respectively. In total, there was 42 (0.41%) and 11 (0.24%) deaths during the five-year follow-up, for the CC and CGC, respectively. The clinical characteristics of the two cohorts can be found in the Supplementary Table S2.

### 3.1 Breast cancer risk prediction models (BCRAT and IBIS) evaluated in the clinical-based cohort

1  
2 Using the BCRAT model, 19.8% of women were classified into the group with an absolute risk equal  
3 or higher than 1.66% (Figure 2A). There was a global agreement between the predicted and observed  
4 number of breast cancer incident cases, with an E/O of 1.01 [0.85-1.20]. However, the goodness of fit  
5 test for the four risk groups showed a significant difference between observed and expected values  
6 (p=0.0439). Among the four risk groups, the E/O was significantly different from one for the average  
7 risk group (E/O: 1.51% [1.01-2.28]). There was also a slight overestimation in the high risk group  
8 (Figure 2B). This finding was in agreement with the estimate values obtained from the calibration  
9 plot with an intercept lower than zero (intercept: -1.9 [-3.4 - -0.4]) and a slope smaller than 1 (slope:  
10 0.6 [0.2 - 0.9]). The BCRAT model had a modest discriminatory accuracy, with a c-index of 58.63  
11 [54.05-63.21] (Figure 2C). The sensitivity and specificity for the 1.66% threshold were 23.7% [16.7-  
12 31.9] and 80.3% [79.5-81], respectively.  
13  
14

15  
16  
17  
18  
19  
20  
21  
22 Using the IBIS model, 18.0% of women were classified into the group with an absolute risk higher or  
23 equal to 1.66% (Figure 2A). There was also a global agreement between the predicted and observed  
24 number of breast cancer incident cases, with an E/O of 1.02 [0.86-1.21]. However, the goodness of fit  
25 test for the four risk groups showed a significant difference between observed and expected values  
26 (p=0.0056). The IBIS risk prediction score overestimated the number of cases in the low risk group  
27 (E/O: 2.38 [1.35-4.19]) and underestimated the number of cases in the intermediate risk group (E/O:  
28 0.78 [0.63-0.97]), while the E/O were non-significant in the two higher risk groups (Figure 2B). The  
29 intercept and slope were not significantly different from zero and one, respectively (0.4 [-1.3 - 2] and  
30 1.1 [0.7 - 1.5], respectively). The IBIS model produced a slightly better discriminatory accuracy than  
31 BCRAT, with a c-index of 63.42 [59.35-67.49] (p=0.013) (Figure 2C). The sensitivity and specificity  
32 for the 1.66% threshold were 26.7% [19.4-35.2] and 82.1% [81.3-82.8], respectively.  
33  
34  
35  
36  
37  
38  
39  
40  
41

### 42 **3.2 Breast cancer risk prediction models (BCRAT, IBIS, PRS and combined scores)** 43 **evaluated in the clinicogenetic-based validation cohort** 44 45

46 Results obtained in the validation CGC cohort that included participants with all the genetic and  
47 clinical information are reported in Tables 1 and 2.  
48  
49

50 In this sub-cohort, BCRAT and IBIS models classified 21% and 18.5% of women into the two higher  
51 risk groups, respectively. There was a global agreement between the predicted and observed number  
52 of breast cancer cases, with an expected/observed ratio of 0.94 [0.73-1.22] and 0.94 [0.73-1.22],  
53  
54  
55  
56  
57  
58  
59  
60



1  
2 respectively. The discriminatory accuracy of the BCRAT and IBIS models were of 59.13 [52.96-  
3 65.29] and 59.63 [53.26-66], respectively.  
4  
5

6 Using the Mavaddat, Shieh, Evans and Wacholder PRS scores, 18%, 19%, 15% and 13.5% of  
7 women were classified into the group with an absolute risk equal or higher than 1.66%, respectively  
8 (Supplementary Figure S1). All the PRS scores had an E/O around 0.82, with a 95%CI including one  
9 (Table 1). None of the goodness of fit test showed a significant departure from the null hypothesis  
10 (Figure 3). The intercepts and slopes for the calibration plot were not significantly different from zero  
11 and one, respectively (Table 1).  
12  
13  
14  
15

16 The PRS' c-indexes were all slightly higher than those obtained from the BCRAT and IBIS scores,  
17 Wacholder score leading to the highest c-index (64.27 [58.09-70.44]). However, none of the c-  
18 indexes was statistically different from the ones computed with the BCRAT and IBIS models (Table  
19 1). The discrimination for women at higher risk was better for the Shieh, Evans and Mavaddat PRS  
20 scores compared to BCRAT and IBIS scores (down-left corner of the ROC curves, Supplementary  
21 Figure S2). Using a 1.66% threshold, all PRS scores increased both the sensitivity and the specificity  
22 as compared to the BCRAT and IBIS risk prediction score (Table 1).  
23  
24  
25  
26  
27  
28  
29  
30

31 The distribution of the combined models' absolute risks can be found in the Supplementary Figure  
32 S1. All the BCRAT + PRS combined models had an E/O around 0.84, with all 95%CI including one  
33 (Table 2). The goodness of fit test using the four risk groups showed a significant departure from the  
34 null hypothesis for the Wacholder and Evans combined models ( $p=0.0475$  and  $p=0.0470$ ,  
35 respectively) (Figure 4). While the Mavaddat and Shieh combined models underestimated the  
36 number of cases in the low risk group (E/O: 0.62 [0.41-0.93] and 0.63 [0.42-0.96], respectively), the  
37 Evans and Wacholder combined models underestimated the number of cases in the intermediate risk  
38 group (E/O: 0.58 [0.39-0.85] and 0.64 [0.43-0.95], respectively). Other groups' E/O were not  
39 different from one. The Shieh combined model had an intercept and slope significantly different from  
40 zero and one, respectively (Table 2).  
41  
42  
43  
44  
45  
46  
47  
48

49 The BCRAT + PRS combined models' c-indexes were all slightly higher than the BCRAT and IBIS  
50 scores, but none of them were statistically different from the ones computed with the BCRAT and  
51 IBIS models (Table 2). The discrimination for women at higher risk was better for the Shieh and  
52 Mavaddat combined scores (down-left corner of the ROC curves, Supplementary Figure S2). Using a  
53  
54  
55  
56  
57  
58  
59  
60

1  
2 1.66% threshold, only the Evans combined model increased both the sensitivity and the specificity as  
3 compared to the BCRAT and IBIS risk prediction score (Table 2).  
4

5  
6 Regarding the IBIS + PRS combined models, the E/O were the same as the BCRAT and IBIS models  
7 (0.94 [0.73-1.22]) with non-significant goodness of fit tests (Table 2). All the combined models had  
8 an E/O that included one in each four risk groups (Figure 4). Intercepts and slopes were not different  
9 from zero and one, respectively (Table 2). The c-indexes were all slightly higher than those obtained  
10 from the BCRAT and IBIS scores, but none of them were statistically different. The discrimination  
11 for women at higher risk was also better for the Shieh and Mavaddat combined scores (down-left  
12 corner of the ROC curves, Supplementary Figure S2). Compared to the BCRAT and IBIS models,  
13 sensitivities values were higher while specificities values were lower (Table 2).  
14  
15  
16  
17  
18  
19  
20

#### 21 **4 Discussion**

22  
23 In this work, we reported the predictive performance of BCRAT, IBIS and four polygenic risk scores  
24 for predicting breast cancer occurrence within five years in a French-Canadian population. Results  
25 show that the BCRAT and IBIS models are globally well calibrated, with an E/O close to one.  
26 However, when focusing on predicted risk subgroups, the BCRAT model overestimates the number  
27 of cases in the average risk group (1.66%-3% risk) while the IBIS model was miscalibrated in the  
28 low and intermediate risk groups (below 1.66% risk). In our study, IBIS produced slightly better  
29 discrimination than BCRAT. As compared to the clinical-based models, the genetic prediction  
30 models (PRS) did not provide a significant improvement of the discriminative capacity. Adding PRS  
31 to the BCRAT or IBIS scores did not significantly increase the predictive power of both models.  
32  
33  
34  
35  
36  
37  
38  
39

40 Despite an overall good mean calibration of the BCRAT model, the calibration across risk subgroups  
41 could be improved. The analysis of the four groups of risk shows a significant difference between  
42 expected and observed cases with an over-prediction in women with a risk equal or higher than  
43 1.66%. This finding is in accordance with previous studies [41–43]. Opposite results have also been  
44 reported in a recent large study with pooled data from two cohorts of women where the BCRAT  
45 model underestimated the risk for values between 1.7% and 3.4% [12]. However, in this latter study,  
46 eligible women were aged between 20 and 70 years at the enrollment and recruited since 1991, while  
47 our population was aged between 40 and 70 years and enrolled since 2009. The overestimation of the  
48 BCRAT risk prediction model for women with a risk higher than 1.66% cannot be explained by  
49 differences in age-standardized incidence rates since, based on information retrieved from national  
50 cancer databases [35,44,45], the incidence rates are comparable between the United States and  
51  
52  
53  
54  
55  
56  
57  
58  
59

1  
2 Canada (250.4 [95%CI 209.0-298.3] cases per 100,000 per year for Canada and 236.8 [95%CI 235.5-  
3 238.1] for US). The IBIS model, the PRS models and the clinico-genetic model (BCRAT+PRS) had  
4 also an overall good mean calibration. However, when analyzing calibration across risk subgroups,  
5 the IBIS model had a significant goodness of fit test, with an over and underestimated the risk in the  
6 low and intermediate groups, respectively, probably explained by the United-Kingdom incidence  
7 rates used by the IBIS model. This is not the case for the PRS models but this result should be  
8 cautiously interpreted in light of the reduced number of breast cancers in the genetic cohort.  
9  
10  
11  
12  
13

14  
15 The discriminatory accuracy of the BCRAT risk prediction model is modest in our population  
16 (58.6%) but is in accordance to the meta-analysis of Wang *et al.* [7] that reported a pooled AUC  
17 close to our c-index (0.60 [0.58-0.62]). The IBIS model produced a better discrimination estimate  
18 (63.4%) than BCRAT. Since we did not collect multi-generational pedigree or *BRCA1/2* gene  
19 mutations data in our cohort, the gain in discrimination for the IBIS model as compared to BCRAT  
20 model may be linked to the non-genetic risk factors. HRT use and the menopausal status, that are risk  
21 factors for the IBIS model, are significantly associated in our series with the outcome ( $p < 0.05$ , results  
22 not shown) and may explain the gain in discriminative accuracy. It emphasizes that the inclusion of  
23 new modifiable risk factors can increase discriminatory accuracy of predictive models.  
24  
25  
26  
27  
28  
29  
30

31 Although the calibration and discriminative power of the PRS and the clinico-genetic models were  
32 satisfactory, they did not provide a significantly better discrimination. This is not surprising since  
33 when combining SNPs the gains in prediction are usually small [15]. Moreover, these non-significant  
34 results should also be interpreted in light of the modest size of our cohort having genetic information  
35 and the different baseline populations used for calculating the BCRAT, IBIS and PRSs models' relative risks.  
36 It should be noted that the combined IBIS+PRS models had a better calibration  
37 regarding the four risk groups compared to the BCRAT+PRS models. However, the absolute risk of  
38 IBIS combined models were not obtained with the same procedures as for BCRAT, which makes the  
39 results not straightforward to compare. Moreover, it is worth noting that combining both clinical and  
40 genetic information in an oversimplified additive way has nevertheless some limitations from an  
41 explanatory point of view.  
42  
43  
44  
45  
46  
47  
48  
49  
50

51 Some strengths of the present study should be highlighted. Firstly, this validation study relies on the  
52 CARTaGENE cohort, which is representative of the French-Canadian urban population of middle-  
53 aged and older adults. Moreover, the linkage with administrative health databases and the Quebec  
54 Breast Cancer Registry improved the outcome quality and accuracy, and made possible to use  
55  
56  
57  
58  
59  
60

1 variables usually difficult to obtain such as the history of breast biopsy or atypical hyperplasia.  
2  
3 Secondly and to the best of our knowledge, this study is the first to evaluate the breast cancer risk  
4 assessment tools in a French-Canadian population for predicting breast cancer at five years.  
5  
6

7  
8 This study has nevertheless some limitations. Firstly, our findings may not apply to younger women  
9 under forty years old. Secondly, we have limited our study to BCRAT and IBIS risk prediction  
10 models. The main reason was that both models were well documented and implemented. The  
11 BCRAT model is used for prevention purpose with chemo-prophylaxis in the US [46,47] and is  
12 composed of clinical variables, easy to obtain in real clinical practice. The IBIS model is also  
13 implemented and can be used even with missing data such as multi-generational pedigree and  
14 *BRCAl/2* gene mutations data. Thirdly, since the genotyping information was not available for all the  
15 cohort, the number of incident cases for validating the combined scores was lower than for validating  
16 BCRAT and IBIS. Moreover, the PRS, BCRAT and IBIS models had to be evaluated on different  
17 sub-cohorts. The larger decrease of IBIS's c-index compared to BCRAT between the two cohorts  
18 might be linked to the smaller size of the clinicogenetic-based cohort as compared to the clinic-based  
19 cohort. The ethnicity differences between the two sub-cohorts could be explained by the divergent  
20 ancestry step of the quality control of genotype data. The highest breast cancer risk among genotyped  
21 women (higher age at first live birth and more relatives with breast cancer) could not be explained by  
22 the women preferentially genotyped, as they were selected for studies unrelated with breast cancers  
23 [30–32]. Even though these two sub-cohorts were similar, it would be useful to collect all genotype  
24 information for the entire cohort to validate the PRS results. Finally, regarding family history  
25 included in the IBIS model, we only had maternal and paternal history of breast cancer and maternal  
26 history of ovary cancer. However, the IBIS model can handle missing data and the performance of  
27 the model remained good without this information. Therefore, the IBIS model should be more  
28 accurate with more family history variables.  
29  
30  
31  
32  
33  
34  
35  
36  
37  
38  
39  
40  
41  
42  
43  
44

#### 45 **4.1 Conclusion**

46  
47 BCRAT and IBIS produced overall good calibration in our French-Canadian cohort but with  
48 moderate performance in terms of discriminative ability. These results are in accordance to previous  
49 validation studies. IBIS had the better discriminatory accuracy. PRS models did not significantly  
50 improve the discrimination. Despite the modest discriminatory power of BCRAT and IBIS, these  
51 tools can be of interest for primary care physicians for delivering a personalized message to their  
52 high risk patients, regarding screening and lifestyle counseling.  
53  
54  
55  
56  
57  
58  
59  
60

## 5 Tables

**Table 1: Comparison of BCRAT, IBIS and PRS scores using the clinicogenetic-based validation cohort.**

|                                           | <b>BCRAT model /<br/>IBIS model</b> | <b>Mavaddat</b>   | <b>Shieh</b>            | <b>Evans</b>           | <b>Wacholder</b>        |
|-------------------------------------------|-------------------------------------|-------------------|-------------------------|------------------------|-------------------------|
| <b>E/O</b>                                | 0.94 [0.73-1.22]                    | 0.83 [0.65-1.08]  | 0.81 [0.63-1.05]        | 0.82 [0.63-1.06]       | 0.81 [0.62-1.04]        |
|                                           | 0.94 [0.73-1.22]                    |                   |                         |                        |                         |
| <b>Goodness of fit</b>                    | p=0.0415                            | p=0.0984          | p=0.1009                | p=0.1992               | p=0.2770                |
|                                           | p=268                               |                   |                         |                        |                         |
| <b>Intercept</b>                          | -2 [-4.4 - 0.2]                     | -0.3 [-2.4 - 1.8] | -1 [-2.5 - 0.5]         | 1 [-1.6 - 3.6]         | 0.9 [-1.8 - 3.5]        |
|                                           | -0.8 [-3.4 - 1.8]                   |                   |                         |                        |                         |
| <b>Slope</b>                              | 0.5 [0 - 1]                         | 0.9 [0.4 - 1.4]   | 0.7 [0.4 - 1.1]         | 1.2 [0.6 - 1.8]        | 1.1 [0.5 - 1.7]         |
|                                           | 0.8 [0.2 - 1.4]                     |                   |                         |                        |                         |
| <b>C-index</b>                            | 59.13 [52.96-<br>65.29]             | 60.77 [53-68.53]  | 62.56 [54.54-<br>70.59] | 63.4 [56.65-<br>70.16] | 64.27 [58.09-<br>70.44] |
|                                           | 59.63 [53.26-66]                    |                   |                         |                        |                         |
| <b>C-indexes<br/>comparison<br/>with:</b> |                                     |                   |                         |                        |                         |
| BCRAT model                               | -                                   | p=0.72            | p=0.46                  | p=0.23                 | p=0.18                  |
| IBIS model                                | -                                   | p=0.81            | p=0.57                  | p=0.34                 | p=0.26                  |
| <b>Sensitivity *</b>                      | 20.7% [11.2-<br>33.4]               | 31% [19.5-44.5]   | 39.7% [27-53.4]         | 34.5% [22.5-<br>48.1]  | 25.9% [15.3-39]         |
|                                           | 24.1% [13.9-<br>37.2]               |                   |                         |                        |                         |
| <b>Specificity *</b>                      | 79% [77.7-80.3]                     | 82.2% [81-83.4]   | 81.3% [80.1-<br>82.5]   | 85.4% [84.2-<br>86.4]  | 86.7% [85.6-<br>87.7]   |
|                                           | 81.6% [80.4-<br>82.8]               |                   |                         |                        |                         |

BCRAT: Breast Cancer Risk Assessment Tool; E/O: expected-to-observed ratio; IBIS: International Breast Cancer Intervention Study risk evaluation tool

Clinicogenetic-based validation cohort: validation of the PRS models and comparison with the BCRAT and IBIS models, genotyped women with all SNPs available. 10% of the cohort was used to obtain the relative risk distribution while the remained 90% was used for computing the results.

95% confidence intervals in square brackets

\* 1.66% threshold

**Table 2: Comparison of BCRAT, IBIS and combined scores using the clinicogenetic-based validation cohort.**

|                                                      | BCRAT model /<br>IBIS model | Combined scores                       |                                    |                                    |                                        |
|------------------------------------------------------|-----------------------------|---------------------------------------|------------------------------------|------------------------------------|----------------------------------------|
|                                                      |                             | Mavaddat<br>with BCRAT /<br>with IBIS | Shieh<br>with BCRAT /<br>with IBIS | Evans<br>with BCRAT /<br>with IBIS | Wacholder<br>with BCRAT /<br>with IBIS |
| <b>E/O</b>                                           | 0.94 [0.73-1.22]            | 0.86 [0.66-1.11]                      | 0.83 [0.64-1.07]                   | 0.83 [0.64-1.08]                   | 0.82 [0.64-1.06]                       |
|                                                      | 0.94 [0.73-1.22]            | 0.95 [0.73-1.22]                      | 0.94 [0.73-1.22]                   | 0.94 [0.73-1.22]                   | 0.94 [0.73-1.22]                       |
| <b>Goodness of fit</b>                               | p=0.0415                    | p=0.161                               | p=0.130                            | p=0.047                            | p=0.048                                |
|                                                      | p=0.268                     | p=0.470                               | p=0.519                            | p=0.993                            | p=0.627                                |
| <b>Intercept</b>                                     | -2 [-4.4 - 0.2]             | - 1.5 [-3.3 - 0.1]                    | -1.6 [-3 - -0.3]                   | -1.2 [-3.1 - 0.6]                  | -1.3 [-3.2 - 0.5]                      |
|                                                      | -0.8 [-3.4 - 1.8]           | -0.9 [-2.7 - 0.8]                     | -1.3 [-2.7 - 0]                    | -0.3 [-2.3 - 1.7]                  | -0.5 [-2.5 - 1.5]                      |
| <b>Slope</b>                                         | 0.5 [0 - 1]                 | 0.6 [0.2 - 1]                         | 0.6 [0.3 - 0.9]                    | 0.7 [0.3 - 1.1]                    | 0.7 [0.2 - 1.1]                        |
|                                                      | 0.8 [0.2 - 1.4]             | 0.8 [0.4 - 1.2]                       | 0.7 [0.3 - 1]                      | 0.9 [0.4 - 1.4]                    | 0.9 [0.4 - 1.3]                        |
| <b>C-index</b>                                       | 59.13 [52.96-<br>65.29]     | 61.42 [54.05-<br>68.78]               | 63.35 [55.58-<br>71.12]            | 62.69 [55.88-<br>69.50]            | 63.58 [57.46-<br>69.69]                |
|                                                      | 59.63 [53.26-66]            | 62.73 [55.34-<br>70.12]               | 63.83 [56.27-<br>71.39]            | 63.35 [56.44-<br>70.26]            | 64.21 [57.88-<br>70.54]                |
| <b>C-indexes<br/>comparison with<br/>BCRAT model</b> | -                           | p=0.50                                | p=0.28                             | p=0.12                             | p=0.059                                |
|                                                      | -                           | p=0.369                               | p=0.265                            | p=0.214                            | p=0.135                                |
| <b>C-indexes</b>                                     | -                           | p=0.66                                | p=0.42                             | p=0.38                             | p=0.22                                 |

| comparison with<br>IBIS model | -                 | p=0.393           | p=0.316           | p=0.169           | p=0.080           |
|-------------------------------|-------------------|-------------------|-------------------|-------------------|-------------------|
| Sensitivity *                 | 20.7% [11.2-33.4] | 36.2% [24-49.9]   | 37.9% [25.5-51.6] | 25.9% [15.3-39]   | 22.4% [12.5-35.3] |
|                               | 24.1% [13.9-37.2] | 36.2% [24-49.9]   | 44.8% [31.7-58.5] | 41.4% [28.6-55.1] | 37.9% [25.5-51.6] |
| Specificity *                 | 79% [77.7-80.3]   | 80.5% [79.2-81.7] | 81.5% [80.2-82.7] | 82.1% [80.9-83.3] | 83.8% [82.6-84.9] |
|                               | 81.6% [80.4-82.8] | 76.6% [75.2-77.9] | 76.9% [75.5-78.2] | 76.9% [75.6-78.2] | 77.9% [76.6-79.2] |

BCRAT: Breast Cancer Risk Assessment Tool; E/O: expected-to-observed ratio; IBIS: International Breast Cancer Intervention Study risk evaluation tool

Combined scores: PRS scores combined with the BCRAT or IBIS scores.

Clinicogenetic-based validation cohort: validation of the PRS models and comparison with the BCRAT and IBIS models, genotyped women with all SNPs available. 10% of the cohort was used to obtain the relative risk distribution while the remained 90% was used for computing the results.

95% confidence intervals in square brackets

\* 1.66% threshold

## 6 Contributorship statement

RJ: conceptualization, data curation, formal analysis, investigation, methodology, visualization, writing - original draft, writing - review & editing. YP: data curation, software, writing - review & editing. TM: data curation, software. CL: resources. NN: conceptualization, resources, writing - review & editing. PB: conceptualization, formal analysis, methodology, project administration, supervision, validation, writing - review & editing. All authors read and approved the final manuscript.

## 7 Competing Interests

The authors declare that the research was conducted in the absence of any commercial or financial relationships that could be construed as a potential conflict of interest.

## 8 Funding

This research received no specific grant from any funding agency in the public, commercial or not-for-profit sectors.

## 9 Data Sharing Statement



The data that support the findings of this study are available from CARTaGENE but restrictions apply to the availability of these data. Data are however available directly from CARTaGENE (<http://cartagene.qc.ca>; [access@cartagene.qc.ca](mailto:access@cartagene.qc.ca); +1 514-345-2156).

## 10 Figures caption

### Figure 1 Flow-chart

Figure 2 **Absolute risk distribution and performance of the BCRAT and IBIS models in the Clinical-based cohort.** (A) Distribution of models' predictions as a function of cumulative percentage of women. Rug plot on the y-axis. (B) Calibration according to the models' predictions groups. P values were computed using a goodness of fit test statistic compared to the critical value from the chi-squared distribution. E/O: expected-to-observed cases. (C) Discrimination power of the models according to sensitivity and specificity. C-index was calculated using the Inverse Probability of Censoring Weighting (IPCW) estimation of cumulative time-dependent ROC curve.

Figure 3 **Calibration according to BCRAT, IBIS and PRS scores' predictions groups.** PRS: polygenic risk score. E/O: expected-to-observed cases. Results from the clinicogenetic-based cohort. P values were computed using a goodness of fit test statistic compared to the critical value from the chi-squared distribution. Each PRS models name referred to the first author of the study from which the PRS were derived.

Figure 4 **Calibration according to BCRAT, IBIS and combined models' predictions groups.** PRS: polygenic risk score. E/O: expected-to-observed cases. Results from the clinicogenetic-based cohort. P values were computed using a goodness of fit test statistic compared to the critical value from the chi-squared distribution. Each PRS models name referred to the first author of the study from which the PRS were derived.

## 11 References

- 1 Canadian Cancer Statistics Advisory Committee. Canadian Cancer Statistics 2019. *Toronto, ON: Canadian Cancer Society* Published Online First: September 2019. [cancer.ca/Canadian-Cancer-Statistics-2019-EN](http://cancer.ca/Canadian-Cancer-Statistics-2019-EN) (accessed 13 Nov 2019).
- 2 Gail MH, Brinton LA, Byar DP, *et al.* Projecting Individualized Probabilities of Developing Breast Cancer for White Females Who Are Being Examined Annually. *JNCI Journal of the National Cancer Institute* 1989;**81**:1879–86. doi:10/djr43s



- 1  
2 3 Tyrer J, Duffy SW, Cuzick J. A breast cancer prediction model incorporating familial and  
3 personal risk factors. *Statist Med* 2004;**23**:1111–30. doi:10.1002/sim.1668
- 4  
5 4 Costantino JP, Gail MH, Pee D, *et al*. Validation studies for models projecting the risk of  
6 invasive and total breast cancer incidence. *J Natl Cancer Inst* 1999;**91**:1541–8. doi:10/ckg9vc
- 7  
8 5 Gail MH, Costantino JP, Pee D, *et al*. Projecting Individualized Absolute Invasive Breast Cancer  
9 Risk in African American Women. *J Natl Cancer Inst* 2007;**99**:1782–92. doi:10/btbj9
- 10  
11 6 Matsuno RK, Costantino JP, Ziegler RG, *et al*. Projecting Individualized Absolute Invasive  
12 Breast Cancer Risk in Asian and Pacific Islander American Women. *J Natl Cancer Inst*  
13 2011;**103**:951–61. doi:10/dkmv6x
- 14  
15 7 Wang X, Huang Y, Li L, *et al*. Assessment of performance of the Gail model for predicting  
16 breast cancer risk: a systematic review and meta-analysis with trial sequential analysis. *Breast*  
17 *Cancer Res* 2018;**20**. doi:10/gc83rw
- 18  
19 8 Farkas A, Vanderberg R, Merriam S, *et al*. Breast Cancer Chemoprevention: A Practical Guide  
20 for the Primary Care Provider. *Journal of Women's Health* 2020;**29**:46–56.  
21 doi:10.1089/jwh.2018.7643
- 22  
23 9 Levine M, Moutquin J-M, Walton R, *et al*. Chemoprevention of breast cancer: A joint guideline  
24 from the Canadian Task Force on Preventive Health Care and the Canadian Breast Cancer  
25 Initiative's Steering Committee on Clinical Practice Guidelines for the Care and Treatment of  
26 Breast Cancer. *CMAJ* 2001;**164**:1681–90.
- 27  
28 10 Canadian Cancer Society. Reducing your risk for breast cancer. www.cancer.ca.  
29 [http://www.cancer.ca/en/cancer-information/cancer-type/breast/risks/reducing-your-](http://www.cancer.ca/en/cancer-information/cancer-type/breast/risks/reducing-your-risk/?region=qc)  
30 [risk/?region=qc](http://www.cancer.ca/en/cancer-information/cancer-type/breast/risks/reducing-your-risk/?region=qc) (accessed 28 Nov 2019).
- 31  
32 11 Voruganti RT, O'Brien MA, Straus SE, *et al*. Primary care physicians' perspectives on computer-  
33 based health risk assessment tools for chronic diseases: a mixed methods study. *BMJ Health &*  
34 *Care Informatics* 2015;**22**:333–9. doi:10/ggt2c8
- 35  
36 12 Terry MB, Liao Y, Whittemore AS, *et al*. 10-year performance of four models of breast cancer  
37 risk: a validation study. *The Lancet Oncology* 2019;**20**:504–17. doi:10/ggt2dp
- 38  
39 13 Gail MH. Performance of BCRAT in high-risk patients with breast cancer. *The Lancet Oncology*  
40 2019;**20**:e285. doi:10.1016/S1470-2045(19)30301-8
- 41  
42 14 Terry MB, Liao Y, Hopper JL, *et al*. Performance of BCRAT in high-risk patients with breast  
43 cancer – Authors' reply. *The Lancet Oncology* 2019;**20**:e286. doi:10.1016/S1470-  
44 2045(19)30311-0
- 45  
46 15 Gail MH. Discriminatory Accuracy From Single-Nucleotide Polymorphisms in Models to Predict  
47 Breast Cancer Risk. *J Natl Cancer Inst* 2008;**100**:1037–41. doi:10/ff2x2r
- 48  
49 16 Dite GS, MacInnis RJ, Bickerstaffe A, *et al*. Breast Cancer Risk Prediction Using Clinical  
50 Models and 77 Independent Risk-Associated SNPs for Women Aged Under 50 Years: Australian  
51  
52  
53  
54  
55  
56  
57  
58  
59

- 1  
2 Breast Cancer Family Registry. *Cancer Epidemiol Biomarkers Prev* 2016;**25**:359–65.  
3 doi:10.1158/1055-9965.EPI-15-0838  
4
- 5 17 Wacholder S, Hartge P, Prentice R, *et al.* Performance of Common Genetic Variants in Breast-  
6 Cancer Risk Models. *N Engl J Med* 2010;**362**:986–93. doi:10/fn7zxw  
7
- 8 18 Mavaddat N, Pharoah PDP, Michailidou K, *et al.* Prediction of Breast Cancer Risk Based on  
9 Profiling With Common Genetic Variants. *J Natl Cancer Inst* 2015;**107**. doi:10/f3nv95  
10
- 11 19 Shieh Y, Hu D, Ma L, *et al.* Breast cancer risk prediction using a clinical risk model and  
12 polygenic risk score. *Breast Cancer Res Treat* 2016;**159**:513–25. doi:10/ggt2dm  
13
- 14 20 Evans DG, Brentnall A, Byers H, *et al.* The impact of a panel of 18 SNPs on breast cancer risk in  
15 women attending a UK familial screening clinic: a case–control study. *J Med Genet*  
16 2017;**54**:111–3. doi:10/f9nd2w  
17
- 18 21 MacArthur J, Bowler E, Cerezo M, *et al.* The new NHGRI-EBI Catalog of published genome-  
19 wide association studies (GWAS Catalog). *Nucleic Acids Research* 2017;**45**:D896. doi:10/f9v7cp  
20
- 21 22 Gouvernement du Québec. Québec Breast Cancer Screening Program.  
22 2018. [https://www.quebec.ca/en/health/advice-and-prevention/screening-and-carrier-testing-  
23 offer/quebec-breast-cancer-screening-program/](https://www.quebec.ca/en/health/advice-and-prevention/screening-and-carrier-testing-offer/quebec-breast-cancer-screening-program/) (accessed 9 Mar 2020).  
24
- 25 23 Shields M, Wilkins K. An update on mammography use in Canada. *Health Rep* 2009;**20**:7–19.  
26
- 27 24 Bernatsky S, Clarke A, Ramsey-Goldman R, *et al.* Hormonal exposures and breast cancer in a  
28 sample of women with systemic lupus erythematosus. *Rheumatology (Oxford)* 2004;**43**:1178–81.  
29 doi:10/bq2cx6  
30
- 31 25 Casals F, Hodgkinson A, Hussin J, *et al.* Whole-Exome Sequencing Reveals a Rapid Change in  
32 the Frequency of Rare Functional Variants in a Founding Population of Humans. *PLoS Genet*  
33 2013;**9**:e1003815. doi:10.1371/journal.pgen.1003815  
34
- 35 26 Scriver CR. Human Genetics: Lessons from Quebec Population. *Annu Rev Genom Hum Genet*  
36 2001;**2**:69–101. doi:10.1146/annurev.genom.2.1.69  
37
- 38 27 Awadalla P, Boileau C, Payette Y, *et al.* Cohort profile of the CARTaGENE study: Quebec’s  
39 population-based biobank for public health and personalized genomics. *International Journal of*  
40 *Epidemiology* 2013;**42**:1285–99. doi:10.1093/ije/dys160  
41
- 42 28 Thériège I, Institut national de santé publique du Québec, Direction systèmes de soins et  
43 services. *Validation de stratégies pour obtenir le taux de détection du cancer, la valeur*  
44 *prédictive positive, la proportion des cancers in situ, la proportion des cancers infiltrants de*  
45 *petite taille et la proportion des cancers infiltrants sans envahissement ganglionnaire dans le*  
46 *cadre des données fournies par le programme québécois de dépistage du cancer du sein*  
47 *(PQDCS)*. Montréal: : Direction des systèmes de soins et services, Institut national de santé  
48 publique 2003.  
49  
50  
51  
52  
53  
54  
55  
56  
57  
58  
59

- 1  
2 29 Tonelli M, Wiebe N, Fortin M, *et al.* Methods for identifying 30 chronic conditions: application  
3 to administrative data. *BMC Medical Informatics and Decision Making* 2015;**15**:31.  
4 doi:10/f698hd  
5
- 6 30 Akçimen F, Ross JP, Sarayloo F, *et al.* Genetic and epidemiological characterization of restless  
7 legs syndrome in Québec. *Sleep* 2019;**43**. doi:10.1093/sleep/zsz265  
8
- 9 31 Hodgkinson A, Idaghdour Y, Gbeha E, *et al.* High-Resolution Genomic Analysis of Human  
10 Mitochondrial RNA Sequence Variation. *Science* 2014;**344**:413–5. doi:10/ggt2b8  
11
- 12 32 Hussin JG, Hodgkinson A, Idaghdour Y, *et al.* Recombination affects accumulation of damaging  
13 and disease-associated mutations in human populations. *Nat Genet* 2015;**47**:400–4. doi:10/ggrr3s  
14
- 15 33 Zhang F. *BCRA: breast cancer risk assessment*. 2018. [https://CRAN.R-](https://CRAN.R-project.org/package=BCRA)  
16 [project.org/package=BCRA](https://CRAN.R-project.org/package=BCRA)  
17
- 18 34 Choudhury PP, Maas P, Wilcox A, *et al.* iCARE: An R package to build, validate and apply  
19 absolute risk models. *PLOS ONE* 2020;**15**:e0228198. doi:10/ggt2ch  
20
- 21 35 Statistics Canada. Table 13-10-0111-01 Number and rates of new cases of primary cancer, by  
22 cancer type, age group and sex. doi.org/10.25318/1310011101-eng (accessed 10 Nov 2019).  
23
- 24 36 Statistics Canada. Table 13-10-0392-01 Deaths and age-specific mortality rates, by selected  
25 grouped causes. <https://doi.org/10.25318/1310039201-eng> (accessed 10 Nov 2019).  
26
- 27 37 Uno H, Cai T, Tian L, *et al.* Evaluating Prediction Rules for t-Year Survivors with Censored  
28 Regression Models. *Journal of the American Statistical Association* 2007;**102**:527–37.  
29 doi:10.1198/016214507000000149  
30
- 31 38 Blanche P, Latouche A, Viallon V. Time-dependent AUC with right-censored data: a survey  
32 study. *arXiv:12106805 [statME]* Published Online First: 25 October  
33 2012.<http://arxiv.org/abs/1210.6805> (accessed 26 Sep 2017).  
34
- 35 39 Blanche P, Dartigues J-F, Jacqmin-Gadda H. Estimating and comparing time-dependent areas  
36 under receiver operating characteristic curves for censored event times with competing risks.  
37 *Statist Med* 2013;**32**:5381–97. doi:10.1002/sim.5958  
38
- 39 40 R Core Team. *R: A Language and Environment for Statistical Computing*. Vienna, Austria: : R  
40 Foundation for Statistical Computing 2020. <https://www.R-project.org/>  
41
- 42 41 Schonberg MA, Li VW, Eliassen AH, *et al.* Performance of the Breast Cancer Risk Assessment  
43 Tool Among Women Age 75 Years and Older. *JNCIJ* 2016;**108**:d3v348. doi:10/ggt2db  
44
- 45 42 Nickson C, Procopio P, Velentzis LS, *et al.* Prospective validation of the NCI Breast Cancer Risk  
46 Assessment Tool (Gail Model) on 40,000 Australian women. *Breast Cancer Res* 2018;**20**:155.  
47 doi:10/ggt2dc  
48
- 49 43 Glynn RJ, Colditz GA, Tamimi RM, *et al.* Comparison of Questionnaire-Based Breast Cancer  
50 Prediction Models in the Nurses' Health Study. *Cancer Epidemiol Biomarkers Prev*  
51 2019;**28**:1187–94. doi:10/ggt2c4  
52  
53  
54  
55  
56  
57  
58  
59

- 1  
2 44 Statistics Canada. Table 17-10-0005-01 Population estimates on July 1st, by age and sex.  
3 doi:doi.org/10.25318/1710000501-eng  
4  
5 45 U.S. Cancer Statistics Working Group. U.S. Cancer Statistics Data Visualizations Tool, based on  
6 November 2018 submission data (1999–2016): U.S. Department of Health and Human Services,  
7 Centers for Disease Control and Prevention and National Cancer Institute.  
8 2019. www.cdc.gov/cancer/dataviz (accessed 9 Oct 2019).  
9  
10  
11 46 Moyer VA. Medications for Risk Reduction of Primary Breast Cancer in Women: U.S.  
12 Preventive Services Task Force Recommendation Statement. *Ann Intern Med* Published Online  
13 First: 24 September 2013. doi:10/ggt2cx  
14  
15 47 Louro J, Posso M, Hilton Boon M, *et al.* A systematic review and quality assessment of  
16 individualised breast cancer risk prediction models. *Br J Cancer* 2019;**121**:76–85. doi:10/ggt2c3  
17  
18

## 19 **12 Ethics approval and consent to participate**

20  
21 This project has been approved by the Research Ethics Board of the CHU Sainte-Justine under the  
22 reference 2020-2427. In addition, CARTaGENE has obtained ethics approval by the CHU Sainte-  
23 Justine under the reference: MP-21-2011-345, 3297. The latest annual ethics renewal was granted on  
24 September 13, 2019. This latter approval implies that all participants have given their consent  
25 (cartagene.qc.ca/sites/default/files/documents/consent/brochure\_en\_0505\_0.pdf). Consent was  
26 obtained from all the participants.  
27  
28  
29  
30

## 31 **13 Acknowledgments**

32  
33 We would like to thank all the CARTaGENE participants for their generous investments in health  
34 research. We would also like to thank the RAMQ and the Commission d'accès à l'information (CAI)  
35 for their support in obtaining the data.  
36  
37  
38  
39

## 40 **14 Supplementary Material**

### 41 **Supplementary Methods**

42  
43 **Supplementary Table S1: SNPs used for each extended model and the associated gene and odds**  
44 **ratio.**

45  
46 **Supplementary Table S2: Characteristics comparison of the women from the Clinical-based**  
47 **and the clinicogenetic-based cohorts.**

48  
49 **Supplementary Figure S1: Distribution of BCRAT, IBIS, PRS and combined scores predictions**  
50 **as a function of cumulative percentage of women. Results from the clinicogenetic-based cohort.**  
51  
52  
53  
54  
55  
56  
57  
58  
59

1  
2 **Supplementary Figure S2: Discrimination power of BCRAT, IBIS, PRS scores and combined**  
3 **models according to sensitivity and specificity.** Results from the clinicogenetic-based cohort. C-  
4 indexes were calculated using the Inverse Probability of Censoring Weighting (IPCW) estimation of  
5 cumulative time-dependent ROC curve. Each PRS models name referred to the first author of the  
6 study from which the PRS were derived.  
7  
8  
9  
10  
11  
12  
13  
14  
15  
16  
17  
18  
19  
20  
21  
22  
23  
24  
25  
26  
27  
28  
29  
30  
31  
32  
33  
34  
35  
36  
37  
38  
39  
40  
41  
42  
43  
44  
45  
46  
47  
48  
49  
50  
51  
52  
53  
54  
55  
56  
57  
58  
59  
60

1  
2  
3  
4  
5  
6  
7  
8  
9  
10  
11  
12  
13  
14  
15  
16  
17  
18  
19  
20  
21  
22  
23  
24  
25  
26  
27  
28  
29  
30  
31  
32  
33  
34  
35  
36  
37  
38  
39  
40  
41  
42  
43  
44  
45  
46  
47  
48  
49  
50  
51  
52  
53  
54  
55  
56  
57  
58  
59  
60



Flow-Chart

145x96mm (300 x 300 DPI)



Absolute risk distribution and performance of the BCRAT and IBIS models in the Clinical-based cohort. (A) Distribution of models' predictions as a function of cumulative percentage of women. Rug plot on the y-axis. (B) Calibration according to the models' predictions groups. P values were computed using a goodness of fit test statistic compared to the critical value from the chi-squared distribution. E/O: expected-to-observed cases. (C) Discrimination power of the models according to sensitivity and specificity. C-index was calculated using the Inverse Probability of Censoring Weighting (IPCW) estimation of cumulative time-dependent ROC curve.

169x179mm (600 x 600 DPI)



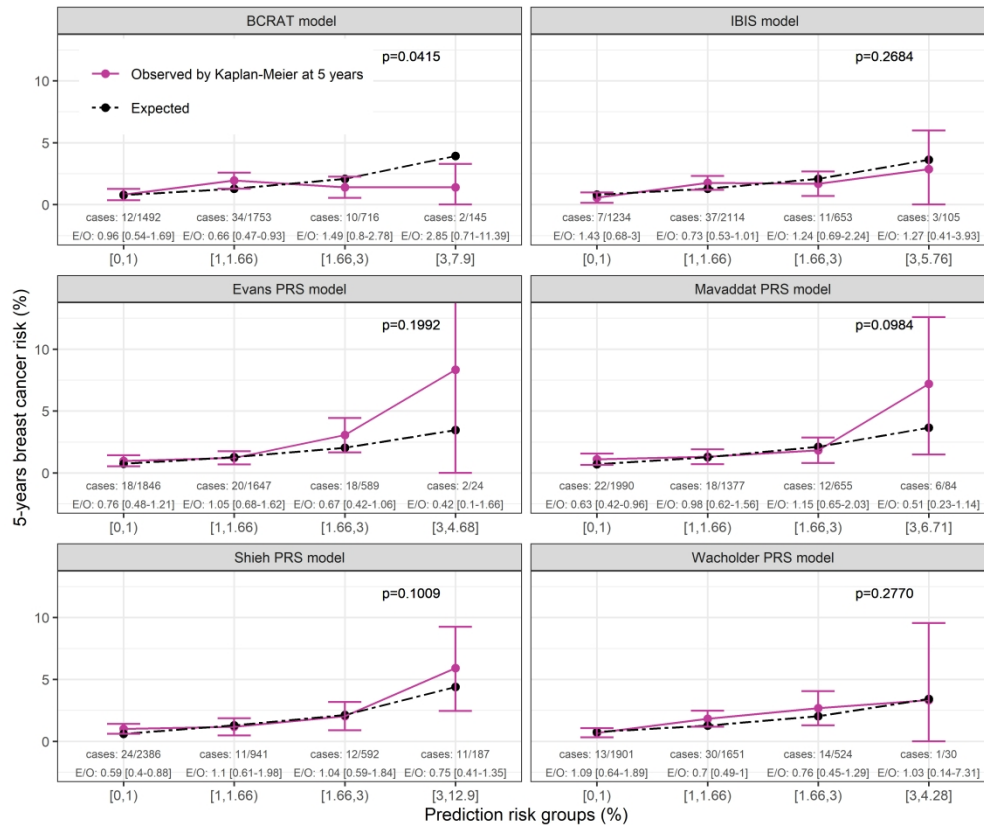

Calibration according to BCRAT, IBIS and PRS scores' predictions groups. PRS: polygenic risk score. E/O: expected-to-observed cases. Results from the clinicogenetic-based cohort. P values were computed using a goodness of fit test statistic compared to the critical value from the chi-squared distribution. Each PRS models name referred to the first author of the study from which the PRS were derived.

179x149mm (600 x 600 DPI)



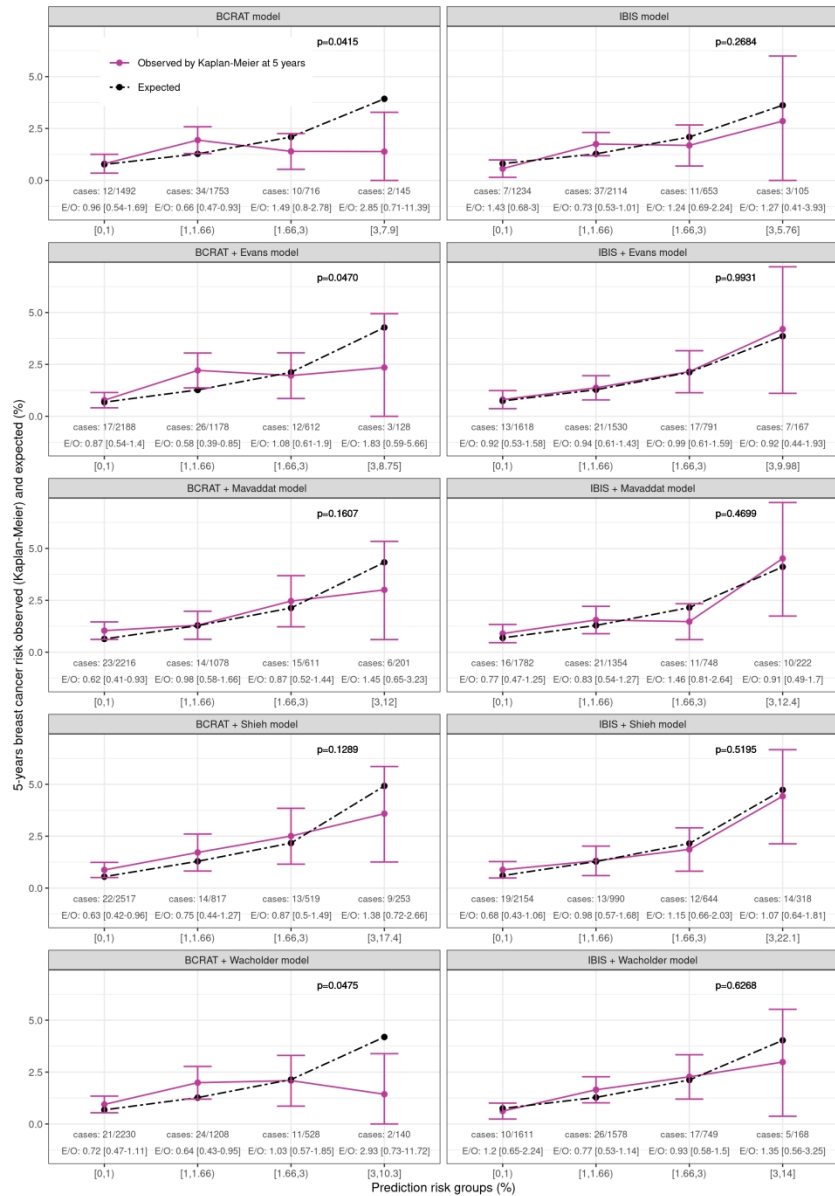

Calibration according to BCRAT, IBIS and combined models' predictions groups.

PRS: polygenic risk score. E/O: expected-to-observed cases. Results from the clinicogenetic-based cohort. P values were computed using a goodness of fit test statistic compared to the critical value from the chi-squared distribution. Each PRS models name referred to the first author of the study from which the PRS were derived.

209x299mm (300 x 300 DPI)

# Supplementary Methods

## Health databases

For identifying participants who had breast cancer, we used two administrative health databases (AHD): 1) the MED-ÉCHO AHD: this database contains all the Quebec Health Insurance Board (RAMQ) diagnoses, hospitalizations and physician claims of insured patients (about 98% of Quebec residents [1]), excluding private healthcare; in the case of cancers, all patients are treated in the public sector. Data were available from January 1<sup>st</sup>, 1998 to March 31<sup>st</sup>, 2016. Dates of death were also retrieved from the RAMQ; 2) the Quebec Breast Cancer Registry: it contains information about the Quebec Breast Cancer Screening Program, such as mammograms' results and breast cancers histological confirmation. Data were available from May 15<sup>th</sup>, 1998 to December 31<sup>st</sup>, 2017.

## References

- 1 RAMQ. Table PA.01 - Nombre de personnes inscrites et admissibles au régime d'assurance maladie du Québec selon le sexe, le groupe d'âge et la région sociosanitaire. 2017. [https://www4.prod.ramq.gouv.qc.ca/IST/CD/CDF\\_DifsnInfoStats/CDF1\\_CnsullInfoStatsCNC\\_iut/DifsnInfoStats.aspx?ETAPE\\_COUR=3&IdPatronRapp=8&Annee=2017&Per=0&LANGUE=en-CA](https://www4.prod.ramq.gouv.qc.ca/IST/CD/CDF_DifsnInfoStats/CDF1_CnsullInfoStatsCNC_iut/DifsnInfoStats.aspx?ETAPE_COUR=3&IdPatronRapp=8&Annee=2017&Per=0&LANGUE=en-CA) (accessed 25 Nov 2019).

## Genetic data

Genotypes were included in the CaG database and were obtained from hybridation upon three different chips: Illumina Omni 2.5M (7.7% of the participants), Affymetrix Axiom UK biobank (8.2%) and Illumina Infinium Global Screening Array (84.1%). A quality control (QC) was made before the imputation (detailed pipeline can be found at [www.cartagene.qc.ca/info-genetic-data](http://www.cartagene.qc.ca/info-genetic-data)): 1) QC sample: for replicated samples, samples with the lowest call rates were removed. Sample with a call rate below 95% were removed. Samples pairs with an identity by state (IBS) higher than 0.20 and similar to at least 50% of the whole set were removed. Then, for pair of samples with an IBS higher than 0.85, when the correct sample could not be identified with certainty, both samples of the pair were removed. Samples with discrepancy between sex chromosome genotypes and reported

1  
2  
3 gender were removed. 2) QC SNP: SNPs with a call rate lower than 95% or deviating from  
4 Hardy–Weinberg equilibrium (with a  $10^{-6}$  threshold) were removed.  
5  
6  
7  
8

9 For the imputation, data were prepared using the Will Rayner toolbox  
10 (www.well.ox.ac.uk/~wrayner/tools/) with the Haplotype Reference Consortium (HRC) as  
11 reference panel [1]. To impute missing SNPs of our cohort, we used the Michigan Imputation  
12 Server with the Minimac4 algorithm [2], with separate chromosomes and chips. Imputation  
13 reference panel was the HRC r1.1 2016 European population, and the phasing was made  
14 with Eagle v2.4 [3]. A total of 39,131,578 SNPs were retrieved.  
15  
16  
17  
18  
19  
20  
21  
22  
23

24 After imputation and after merging chromosomes, we used men and women to perform a  
25 sample QC based on the Anderson *et al.* protocole [4]: samples with a call rate lower than  
26 95% and an heterozygosity higher than 3 standard deviation were removed. After LD  
27 pruning (window size: 50kb; step size: 5 variants; pairwise  $r^2$  threshold: 0.2), for pair of  
28 participants with an IBS higher than 0.1875, the sample with the lowest call rate was  
29 removed. To remove samples with divergent ancestries, we used the two first principal  
30 components with the HapMap phase III reference panel. As we would like to have all SNPs  
31 available for calculating PRS, we did not perform an additional SNPs QC. QC process was  
32 performed using PLINK v1.90b6.2 and v2.00a2LM 64-bit ([5,6]; URL:  
33 pngu.mgh.harvard.edu/purcell/plink/).  
34  
35  
36  
37  
38  
39  
40  
41  
42  
43  
44  
45  
46

## 47 References

- 49 1. the Haplotype Reference Consortium, McCarthy S, Das S, Kretzschmar W, Delaneau O,  
50 Wood AR, et al. A reference panel of 64,976 haplotypes for genotype imputation. *Nat*  
51 *Genet.* 2016;48:1279.
- 52 2. Das S, Forer L, Schönherr S, Sidore C, Locke AE, Kwong A, et al. Next-generation  
53 genotype imputation service and methods. *Nat Genet.* 2016;48(10):1284–7.
- 54 3. Loh P-R, Danecek P, Palamara PF, Fuchsberger C, A Reshef Y, K Finucane H, et al.  
55 Reference-based phasing using the Haplotype Reference Consortium panel. *Nat Genet.*  
56 2016;48(11):1443–8.
- 57 4. Anderson CA, Pettersson FH, Clarke GM, Cardon LR, Morris AP, Zondervan KT. Data  
58 quality control in genetic case-control association studies. *Nat Protoc.* 2010  
59 Sep;5(9):1564–73.  
60

5. Purcell S, Neale B, Todd-Brown K, Thomas L, Ferreira MAR, Bender D, et al. PLINK: a tool set for whole-genome association and population-based linkage analyses. *Am J Hum Genet.* 2007 Sep;81(3):559–75.
6. Chang CC, Chow CC, Tellier LC, Vattikuti S, Purcell SM, Lee JJ. Second-generation PLINK: rising to the challenge of larger and richer datasets. *GigaScience.* 2015 Dec;4(1):7.

## Absolute risk of breast cancer

The absolute risk of breast cancer over an established period  $[t_0, t_1]$  (five years in this study) is the probability that a woman who is free of a breast cancer at age  $t_0$  and has a risk score  $S$  will be diagnosed with breast cancer over the period  $[t_0, t_1]$ .

Under the assumption of a multiplicative proportional hazard model (or Cox model), this latter conditional probability (denoted  $AR(t_0, t_1; S)$ ) can be written such as:

$$AR(t_0, t_1; S) = \int_{t_0}^{t_1} \lambda_0(t) e^S \exp \left[ - \int_{t_0}^t \lambda_0(u) e^S + \gamma(u) du \right] dt$$

where  $\lambda_0(t)$  and  $\gamma(t)$  are the baseline age-specific hazard rate for breast cancer and the age-specific mortality hazard rate from other causes (competing risks), respectively. In practice, the absolute risk is computed using piece-wise constant hazard rates.

These baseline hazard rates are calculated using marginal (or composite) hazard rates obtained from registries, together with either the attributable hazard function or the risk factor distribution.

In this work, the timescale of the analyses was age of an individual so that  $t_0$  was the age of a woman at entry into the cohort and  $t_1$  was the age five years later.

For the IBIS model, the baseline age-specific hazard rate for breast cancer is replaced by a hazard rate estimate obtained from the segregation model conditionally on the woman's family history.

## Variables extraction and coding

Age at inclusion was calculated using the birthdate. We retrieved from the CARTaGENE questionnaire the first menstrual period, first live birth, number of first-degree relatives with breast cancer, ethnicity, menopause occurrence and age at menopause, height, weight, hormonal replacement therapy (HRT) use, length of HRT and last HRT use. If first menstrual period occurred after first live birth, both were considered as missing. We retrieved from the Quebec Breast Cancer Registry the previous breast biopsy and the number of biopsy with hyperplasia, atypical hyperplasia and lobular carcinoma *in situ*. We retrieved from the RAMQ the occurrence and age of ovary cancers.

1  
2  
3  
4  
5 How the variables were coded for the IBIS model can be found online

6 (<https://ems-trials.org/riskevaluator/>), in the Documentation section, file “Risk program input  
7  
8 file format (v6-8)”  
9  
10  
11  
12  
13  
14  
15  
16  
17  
18  
19  
20  
21  
22  
23  
24  
25  
26  
27  
28  
29  
30  
31  
32  
33  
34  
35  
36  
37  
38  
39  
40  
41  
42  
43  
44  
45  
46  
47  
48  
49  
50  
51  
52  
53  
54  
55  
56  
57  
58  
59  
60

Supplementary Table S1

|    | snp        | id*          | genes                   | wacholder** | evans | mavaddat | shieh | shieh_asian*** |
|----|------------|--------------|-------------------------|-------------|-------|----------|-------|----------------|
| 4  | rs13387042 | 2:217905832  | AC007749.1 - RN7SKP43   | 0.8/0.7     | 0,88  | 0,88     | 0,88  | 1,06           |
| 5  | rs1045485  | 2:202149589  | -                       | 0.89/0.69   | -     | 0,96     | -     | -              |
| 6  | rs999737   | 14:69034682  | RAD51B                  | 0.91/0.67   | -     | 0,92     | 0,92  | 0,93           |
| 7  | rs3817198  | 11:1909006   | LSP1                    | 1.04/1.18   | -     | 1,07     | 1,07  | 1,07           |
| 8  | rs889312   | 5:56031884   | C5orf67 - AC008940.1    | 1.05/1.1    | 1,12  | 1,12     | 1,12  | 1,05           |
| 9  | rs7716600  | 5:44875005   | AC093297.2 - AC114954.1 | 1.11/1.46   | -     | -        | -     | -              |
| 10 | rs13281615 | 8:128355618  | CASC8, POU5F1B, PCAT1   | 1.14/1.36   | -     | 1,09     | 1,09  | 1,03           |
| 11 | rs3803662  | 16:52586341  | CASC16                  | 1.16/1.44   | 1,23  | 1,23     | 1,24  | 1,15           |
| 12 | rs2981582  | 10:123352317 | FGFR2                   | 1.18/1.6    | -     | -        | -     | -              |
| 13 | rs11249433 | 1:121280613  | EMBP1                   | 1.23/1.3    | 1,09  | 1,10     | 1,09  | 1,16           |
| 14 | rs10995190 | 10:64278682  | AC024598.1, ZNF365      |             | 0,86  | 0,86     | 0,86  | 0,94           |
| 15 | rs1562430  | 8:128387852  | POU5F1B, CASC8, PCAT1   |             | 0,90  | -        | 1,16  | 1,16           |
| 16 | rs909116   | 11:1941946   | TNNT3                   |             | 0,93  | -        | -     | -              |
| 17 | rs1156287  | 17:53076799  | -                       |             | 0,93  | -        | -     | -              |
| 18 | rs713588   | 10:5886962   | -                       |             | 1,01  | -        | -     | -              |
| 19 | rs8009944  | 14:69039588  | -                       |             | 1,04  | -        | -     | -              |
| 20 | rs10931936 | 2:202143928  | -                       |             | 1,04  | -        | -     | -              |
| 21 | rs1011970  | 9:22062134   | CDKN2B-AS1              |             | 1,05  | 1,05     | 1,06  | 1,06           |
| 22 | rs704010   | 10:80841148  | ZMIZ1                   |             | 1,09  | 1,07     | 1,08  | 1,05           |
| 23 | rs4973768  | 3:27416013   | SLC4A7                  |             | 1,09  | 1,09     | 1,10  | 1,11           |
| 24 | rs9790879  | 5:44899885   | -                       |             | 1,09  | -        | -     | -              |
| 25 | rs3757318  | 6:151914113  | CCDC170                 |             | 1,16  | -        | 1,16  | 1,16           |
| 26 | rs614367   | 11:69328764  | LINC01488 - CCND1       |             | 1,21  | -        | 1,21  | 1,29           |
| 27 | rs2981579  | 10:123337335 | FGFR2                   |             | 1,27  | 1,25     | 1,27  | 1,27           |
| 28 | rs10771399 | 12:28155080  | PTHLH - CCDC91          |             | -     | 0,86     | 0,86  | 1,15           |
| 29 | rs865686   | 9:110888478  | CHCHD4P2 - AL353742.1   |             | -     | 0,90     | 0,89  | 1,04           |
| 30 | rs6828523  | 4:175846426  | ADAM29                  |             | -     | 0,91     | 0,90  | 1,11           |
| 31 | rs17356907 | 12:96027759  | PGAM1P5                 |             | -     | 0,91     | 0,91  | 1,08           |
| 32 | rs6472903  | 8:76230301   | CASC9                   |             | -     | 0,91     | 0,91  | 1,16           |
| 33 | rs4849887  | 2:121245122  | LINC01101 - AC073257.2  |             | -     | 0,92     | 0,91  | 1,07           |
| 34 | rs1353747  | 5:58337481   | AC092343.1, PDE4D       |             | -     | 0,92     | 0,92  | 1,00           |
| 35 | rs1292011  | 12:115836522 | AC078880.2 - AC009803.2 |             | -     | 0,92     | 0,92  | 1,11           |
| 36 | rs2236007  | 14:37132769  | PAX9                    |             | -     | 0,92     | 0,93  | 1,09           |
| 37 | rs2823093  | 21:16520832  | AF127577.5 - AF246928.1 |             | -     | 0,93     | 0,92  | 1,08           |
| 38 | rs17817449 | 16:53813367  | FTO                     |             | -     | 0,93     | 0,93  | 1,09           |
| 39 | rs6504950  | 17:53056471  | STXBP4                  |             | -     | 0,93     | 0,94  | 1,02           |
| 40 | rs4808801  | 19:18571141  | ELL                     |             | -     | 0,93     | 1,08  | 1,04           |
| 41 | rs2736108  | 5:1297488    | TERT - MIR4457          |             | -     | 0,94     | 0,94  | 0,94           |
| 42 | rs11242675 | 6:1318878    | FOXQ1 - LINC01394       |             | -     | 0,94     | 0,94  | 0,99           |
| 43 | rs616488   | 1:10566215   | PEX14                   |             | -     | 0,94     | 0,94  | 1,06           |
| 44 | rs11199914 | 10:123093901 | LINC01153 - RN7SKP167   |             | -     | 0,94     | 0,95  | 1,03           |
| 45 | rs3903072  | 11:65583066  | AP001266.1 - CFL1       |             | -     | 0,94     | 0,95  | 1,05           |
| 46 | rs1550623  | 2:174212894  | AC092573.2              |             | -     | 0,94     | 1,06  | 1,21           |
| 47 | rs720475   | 7:144074929  | ARHGEF5                 |             | -     | 0,95     | 0,94  | 1,02           |
| 48 | rs1436904  | 18:24570667  | CHST9, AQP4-AS1         |             | -     | 0,95     | 0,96  | 1,02           |
| 49 | rs2016394  | 2:172972971  | DLX2-DT                 |             | -     | 0,95     | -     | -              |
| 50 | rs527616   | 18:24337424  | AQP4-AS1                |             | -     | 0,96     | 0,95  | 1,03           |
| 51 | rs11820646 | 11:129461171 | AP003500.2              |             | -     | 0,96     | 0,95  | 1,05           |

Supplementary Table S1

|    |             |              |                            |   |      |      |      |
|----|-------------|--------------|----------------------------|---|------|------|------|
| 1  |             |              |                            |   |      |      |      |
| 2  |             |              |                            |   |      |      |      |
| 3  |             |              |                            |   |      |      |      |
| 4  | rs2380205   | 10:5886734   | GDI2 - ANKRD16             | - | 0,98 | 0,94 | 1,02 |
| 5  | rs6678914   | 1:202187176  | LGR6                       | - | 0,99 | 0,91 | 1,10 |
| 6  | rs10069690  | 5:1279790    | TERT                       | - | 1,02 | 1,06 | 1,05 |
| 7  | rs75915166  | 11:69379161  | LINC01488 - CCND1          | - | 1,02 | 1,31 | 1,00 |
| 8  | rs12422552  | 12:14413931  | GNAI2P1 - RPL30P11         | - | 1,03 | 1,05 | 1,05 |
| 9  | rs4245739   | 1:204518842  | MDM4                       | - | 1,03 | 1,14 | 1,14 |
| 10 | rs8170      | 19:17389704  | USHBP1, AC010463.1, BABAM1 | - | 1,03 | 1,15 | 1,00 |
| 11 | rs2363956   | 19:17394124  | ANKLE1                     | - | 1,03 | -    | -    |
| 12 | rs10472076  | 5:58184061   | AC008852.1 - PDE4D         | - | 1,04 | 1,05 | 1,02 |
| 13 | rs12710696  | 2:19320803   | LINC01376                  | - | 1,04 | 1,10 | 1,10 |
| 14 | rs11075995  | 16:53855291  | FTO                        | - | 1,04 | 1,11 | 1,11 |
| 15 | rs7726159   | 5:1282319    | TERT                       | - | 1,04 | -    | -    |
| 16 | rs9790517   | 4:106084778  | TET2                       | - | 1,05 | 1,05 | 1,02 |
| 17 | rs204247    | 6:13722523   | RANBP9 - MCUR1             | - | 1,05 | 1,05 | 1,03 |
| 18 | rs10759243  | 9:110306115  | PPIAP88 - RNU6-996P        | - | 1,05 | 1,06 | 1,05 |
| 19 | rs12493607  | 3:30682939   | TGFBR2                     | - | 1,05 | 1,06 | 1,05 |
| 20 | rs2046210   | 6:151948366  | CCDC170 - ESR1             | - | 1,05 | 1,15 | 1,27 |
| 21 | rs17529111  | 6:82128386   | AL590824.1 - TENT5A        | - | 1,05 | -    | -    |
| 22 | rs7904519   | 10:114773927 | TCF7L2                     | - | 1,06 | 1,06 | 1,02 |
| 23 | rs3760982   | 19:44286513  | KCNN4 - LYPD5              | - | 1,06 | 1,06 | 1,02 |
| 24 | rs941764    | 14:91841069  | CCDC88C                    | - | 1,06 | 1,06 | 1,05 |
| 25 | rs7072776   | 10:22032942  | MLLT10 - DNAJC1            | - | 1,06 | 1,07 | 1,04 |
| 26 | rs11780156  | 8:129194641  | PVT1                       | - | 1,07 | 1,07 | 1,00 |
| 27 | rs6762644   | 3:4742276    | ITPR1                      | - | 1,07 | 1,07 | 1,03 |
| 28 | rs9693444   | 8:29509616   | RPL17P33 - LINC00589       | - | 1,07 | 1,07 | 1,08 |
| 29 | rs1432679   | 5:158244083  | EBF1                       | - | 1,07 | 1,07 | 1,09 |
| 30 | rs2588809   | 14:68660428  | RAD51B                     | - | 1,07 | 1,08 | 1,06 |
| 31 | rs16857609  | 2:218296508  | DIRC3                      | - | 1,07 | 1,08 | 1,07 |
| 32 | rs11552449  | 1:114448389  | DCLRE1B                    | - | 1,08 | 1,07 | 1,03 |
| 33 | rs13329835  | 16:80650805  | CDYL2                      | - | 1,08 | 1,08 | 1,02 |
| 34 | rs132390    | 22:29621477  | EMID1                      | - | 1,11 | 1,12 | 1,00 |
| 35 | rs10941679  | 5:44706498   | AC093292.1 - RN7SL383P     | - | 1,12 | 1,13 | 1,08 |
| 36 | rs554219    | 11:69331642  | LINC01488 - CCND1          | - | 1,12 | 1,27 | 1,00 |
| 37 | rs6001930   | 22:40876234  | MRTFA                      | - | 1,13 | 1,12 | 1,03 |
| 38 | rs2943559   | 8:76417937   | HNF4G                      | - | 1,13 | 1,13 | 0,96 |
| 39 | rs12662670  | 6:151918856  | CCDC170                    | - | 1,14 | -    | -    |
| 40 | rs78540526  | 11:69331418  | LINC01488 - CCND1          | - | 1,18 | -    | -    |
| 41 | rs11814448  | 10:22315843  | DNAJC1 - ADIPOR1P1         | - | 1,22 | 1,26 | 1,08 |
| 42 | rs11571833  | 13:32972626  | BRCA2                      | - | 1,26 | 1,26 | 1,00 |
| 43 | rs17879961  | 22:29121087  | CHEK2                      | - | 1,36 | 1,36 | 1,00 |
| 44 | rs140068132 | 6:151954834  | CCDC170 - ESR1             | - | -    | 0,60 | 1,00 |
| 45 | rs10822013  | 10:64251977  | AC024598.1, ZNF365         | - | -    | 0,89 | 1,08 |
| 46 | rs9485372   | 6:149608874  | TAB2                       | - | -    | 0,90 | 1,11 |
| 47 | rs10474352  | 5:90732225   | ARRDC3-AS1                 | - | -    | 0,92 | 1,09 |
| 48 | rs2290203   | 15:91512067  | PRC1, AC068831.7, PRC1-AS1 | - | -    | 0,93 | 1,08 |
| 49 | rs17530068  | 6:82193109   | AL590824.1 - TENT5A        | - | -    | 1,05 | 1,05 |
| 50 | rs9383938   | 6:151987357  | ESR1                       | - | -    | 1,08 | 1,08 |
| 51 | rs4951011   | 1:203766331  | ZBED6, ZC3H11A             | - | -    | 1,09 | 1,09 |
| 52 | rs2284378   | 20:32588095  | RALY                       | - | -    | 1,10 | 1,10 |
| 53 |             |              |                            |   |      |      |      |
| 54 |             |              |                            |   |      |      |      |
| 55 |             |              |                            |   |      |      |      |
| 56 |             |              |                            |   |      |      |      |
| 57 |             |              |                            |   |      |      |      |
| 58 |             |              |                            |   |      |      |      |
| 59 |             |              |                            |   |      |      |      |
| 60 |             |              |                            |   |      |      |      |

Supplementary Table S1

1  
2  
3  
4  
5  
6  
7  
8  
9  
10  
11  
12  
13  
14  
15  
16  
17  
18  
19  
20  
21  
22  
23  
24  
25  
26  
27  
28  
29  
30  
31  
32  
33  
34  
35  
36  
37  
38  
39  
40  
41  
42  
43  
44  
45  
46  
47  
48  
49  
50  
51  
52  
53  
54  
55  
56  
57  
58  
59  
60

|           |             |                        |   |   |      |      |
|-----------|-------------|------------------------|---|---|------|------|
| rs2392780 | 8:128388025 | POU5F1B, CASC8, PCAT1  | - | - | 1,15 | 1,00 |
| rs4415084 | 5:44662515  | LINC02224 - AC093292.1 | - | - | 1,17 | 1,00 |
| rs3822625 | 5:56178111  | MAP3K1                 | - | - | 1,36 | 1,36 |
| rs7726354 | 5:56256483  | MIER3                  | - | - | 1,37 | 1,37 |

\* SNPs' position were based on build GRCh37/hg19

\*\* OR for one allele/two alleles

\*\*\* OR from Shieh's study used for Asian women

For peer review only



Supplementary Table S1

For peer review only

1  
2  
3  
4  
5  
6  
7  
8  
9  
10  
11  
12  
13  
14  
15  
16  
17  
18  
19  
20  
21  
22  
23  
24  
25  
26  
27  
28  
29  
30  
31  
32  
33  
34  
35  
36  
37  
38  
39  
40  
41  
42  
43  
44  
45  
46  
47  
48  
49  
50  
51  
52  
53  
54  
55  
56  
57  
58  
59  
60

**Table S2**

|                                            | <b>Clinical-based cohort</b> | <b>Clinicogenetic-based cohort</b> |
|--------------------------------------------|------------------------------|------------------------------------|
|                                            | <b>N=10,200</b>              | <b>N=4,555</b>                     |
| Breast cancer within 5 years               | 131 (1.28%)                  | 58 (1.27%)                         |
| BCRAT absolute risk (%)                    | 1.30 (0.74)                  | 1.33 (0.73)                        |
| IBIS absolute risk (%)                     | 1.31 (0.59)                  | 1.33 (0.60)                        |
| Age at baseline (years)                    | 54.1 (7.7)                   | 54.1 (7.6)                         |
| Age categories:                            |                              |                                    |
| <=49                                       | 3,556 (34.9%)                | 1,557 (34.2%)                      |
| 50-59                                      | 3,980 (39.0%)                | 1,839 (40.4%)                      |
| >=60                                       | 2,664 (26.1%)                | 1,159 (25.4%)                      |
| Birth province:                            |                              |                                    |
| In Canada outside Quebec                   | 333 (3.3%)                   | 74 (1.6%)                          |
| Outside Canada                             | 1,490 (14.6%)                | 189 (4.1%)                         |
| Quebec                                     | 8,373 (82.1%)                | 4,292 (94.2%)                      |
| Missing                                    | 4                            | 0                                  |
| Ethnicity:                                 |                              |                                    |
| Asian                                      | 188 (1.8%)                   | 5 (0.1%)                           |
| Black African                              | 182 (1.8%)                   | 0 (0.0%)                           |
| Hispanic non-american                      | 234 (2.3%)                   | 1 (<0.1%)                          |
| Other                                      | 542 (5.3%)                   | 86 (1.9%)                          |
| White/European                             | 9,054 (88.8%)                | 4,463 (98.0%)                      |
| Age at menarche (years):                   |                              |                                    |
| <=11                                       | 2,305 (22.9%)                | 1,027 (22.7%)                      |
| 12-13                                      | 4,754 (47.2%)                | 2,166 (47.9%)                      |
| >=14                                       | 3,021 (30.0%)                | 1,331 (29.4%)                      |
| Missing                                    | 120                          | 31                                 |
| Age at first live birth (years):           |                              |                                    |
| <=19                                       | 1,124 (13.1%)                | 422 (11.1%)                        |
| 20-24                                      | 2,955 (34.5%)                | 1,324 (34.8%)                      |
| 25-29                                      | 2,814 (32.9%)                | 1,312 (34.5%)                      |
| >=30                                       | 1,621 (19.0%)                | 734 (19.3%)                        |
| Nulliparous                                | 40 (0.5%)                    | 14 (0.4%)                          |
| Missing                                    | 1,646                        | 749                                |
| First-degree relatives with breast cancer: |                              |                                    |
| 0                                          | 8,945 (87.7%)                | 3,949 (86.7%)                      |
| 1                                          | 1,130 (11.1%)                | 556 (12.2%)                        |
| >=2                                        | 125 (1.23%)                  | 50 (1.10%)                         |
| Previous breast biopsy:                    |                              |                                    |
| 0                                          | 10,023 (98.3%)               | 4,463 (98.0%)                      |

|                                 |                                       |                  |                  |
|---------------------------------|---------------------------------------|------------------|------------------|
|                                 | 1                                     | 134 (1.31%)      | 71 (1.56%)       |
|                                 | >=2                                   | 43 (0.42%)       | 21 (0.46%)       |
| History of hyperplasia          |                                       | 6 (0.06%)        | 1 (0.02%)        |
| History of atypical hyperplasia |                                       | 1 (0.56%)        | 0 (0.00%)        |
| Lobular Carcinoma In Situ       |                                       | 0                | 0                |
| Weight (Kg)                     |                                       | 67.4 [59.4;78.0] | 66.8 [59.6;76.8] |
| Height (m)                      |                                       | 1.61 [1.57;1.65] | 1.61 [1.57;1.65] |
| History of ovary cancer         |                                       | 94 (0.92%)       | 46 (1.01%)       |
| Menopause occurrence            |                                       |                  |                  |
|                                 | Pre-menopausal                        | 4176 (40.9%)     | 1891 (41.5%)     |
|                                 | Post-menopausal                       | 5885 (57.7%)     | 2617 (57.5%)     |
|                                 | Unknown                               | 139 (1.36%)      | 47 (1.03%)       |
| Use of HRT                      |                                       |                  |                  |
|                                 | Never                                 | 7477 (73.3%)     | 3249 (71.3%)     |
|                                 | Previous user (more than 5 years ago) | 1126 (11.0%)     | 506 (11.1%)      |
|                                 | Previous user (less than 5 years ago) | 1285 (12.6%)     | 646 (14.2%)      |
|                                 | Current user                          | 312 (3.06%)      | 154 (3.38%)      |
| HRT length of use (years)       |                                       | 0.00 [0.00;1.00] | 0.00 [0.00;1.00] |
| Last HRT use (years)            |                                       | 0.00 [0.00;0.00] | 0.00 [0.00;0.00] |
| Mother history of breast cancer |                                       | 832 (8.16%)      | 412 (9.05%)      |
| Mother history of ovary cancer  |                                       | 114 (1.12%)      | 60 (1.32%)       |
| Father history of breast cancer |                                       | 8 (0.08%)        | 2 (0.04%)        |

HRT: hormonal replacement therapy; PRS: polygenic risk score; clinical-based cohort: validation of the BCRAT and IBIS models, included women with a BCRAT and an IBIS score; clinicogenetic-based cohort: validation of the PRS models and comparison with the BCRAT and IBIS models, genotyped women with all SNPs available.

\* Not available for the phase 2

1  
2  
3  
4  
5  
6  
7  
8  
9  
10  
11  
12  
13  
14  
15  
16  
17  
18  
19  
20  
21  
22  
23  
24  
25  
26  
27

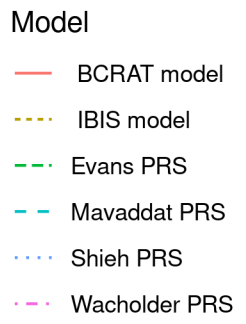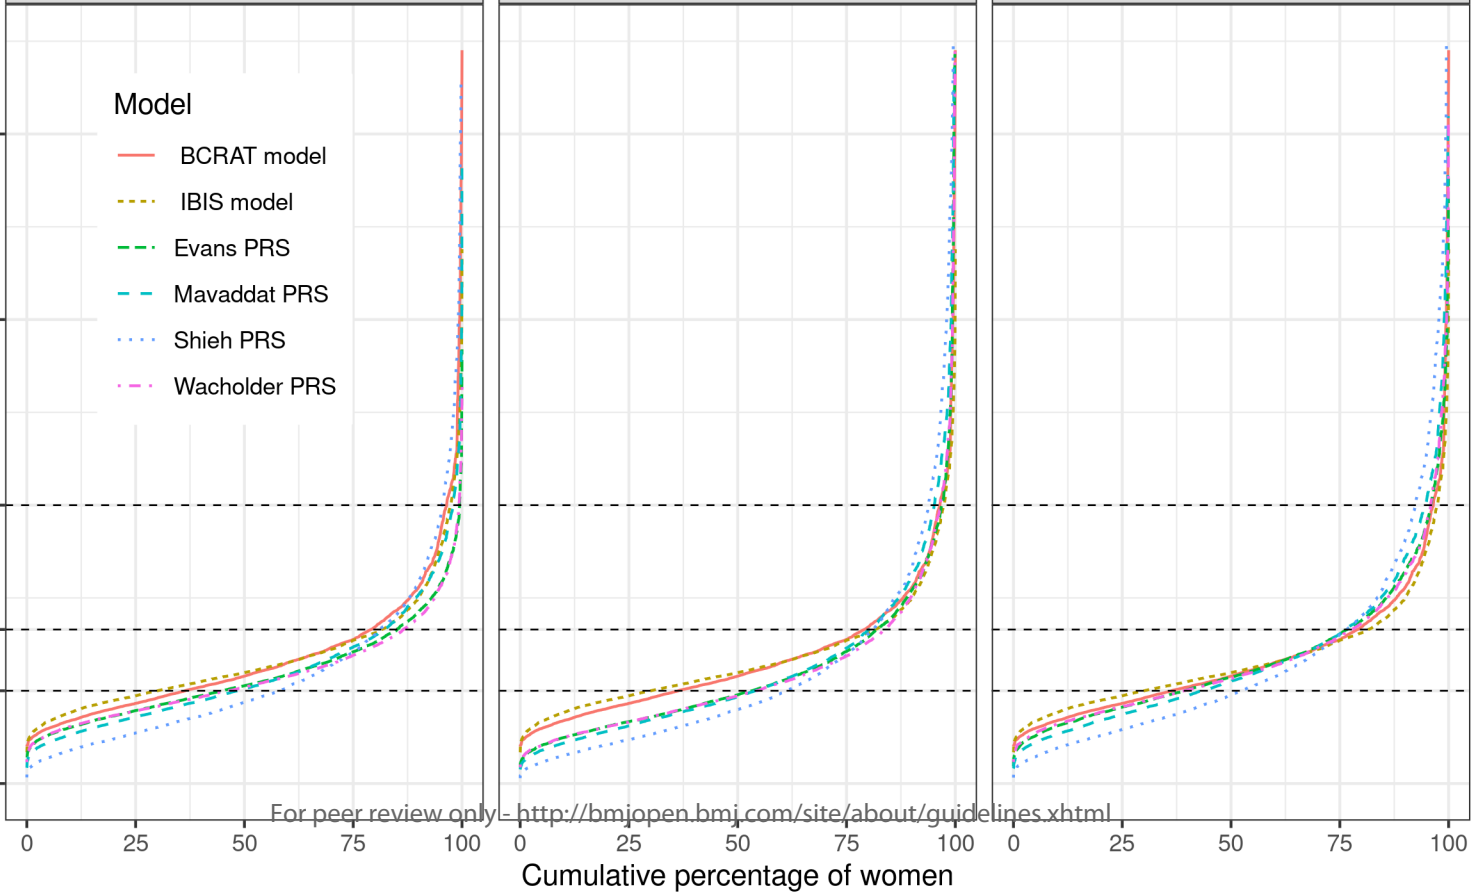

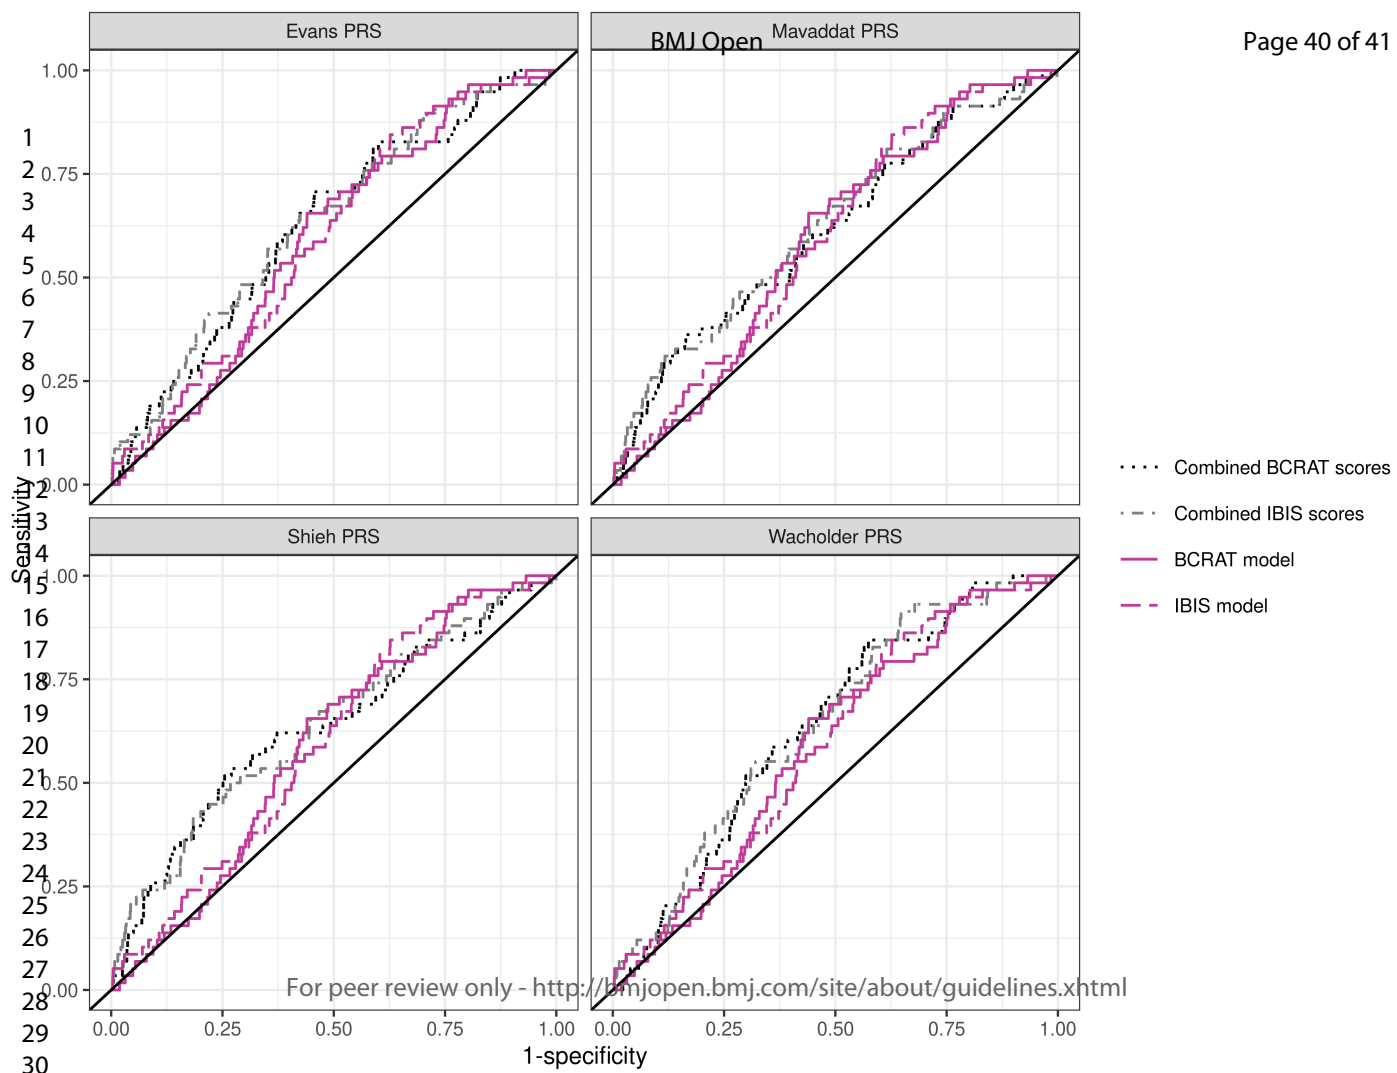

1 STROBE Statement—Checklist of items that should be included in reports of *cohort studies*

|                           | Item No | Recommendation                                                                                                                                                                                    | Page number |
|---------------------------|---------|---------------------------------------------------------------------------------------------------------------------------------------------------------------------------------------------------|-------------|
| Title and abstract        | 1       | (a) Indicate the study's design with a commonly used term in the title or the abstract                                                                                                            | 1           |
|                           |         | (b) Provide in the abstract an informative and balanced summary of what was done and what was found                                                                                               | 1-2         |
| <b>Introduction</b>       |         |                                                                                                                                                                                                   |             |
| Background /rationale     | 2       | Explain the scientific background and rationale for the investigation being reported                                                                                                              | 3-5         |
| Objectives                | 3       | State specific objectives, including any prespecified hypotheses                                                                                                                                  | 5           |
| <b>Methods</b>            |         |                                                                                                                                                                                                   |             |
| Study design              | 4       | Present key elements of study design early in the paper                                                                                                                                           | 5-6         |
| Setting                   | 5       | Describe the setting, locations, and relevant dates, including periods of recruitment, exposure, follow-up, and data collection                                                                   | 5           |
| Participants              | 6       | (a) Give the eligibility criteria, and the sources and methods of selection of participants. Describe methods of follow-up                                                                        | 6           |
|                           |         | (b) For matched studies, give matching criteria and number of exposed and unexposed                                                                                                               | -           |
| Variables                 | 7       | Clearly define all outcomes, exposures, predictors, potential confounders, and effect modifiers. Give diagnostic criteria, if applicable                                                          | 7-8         |
| Data sources/ measurement | 8*      | For each variable of interest, give sources of data and details of methods of assessment (measurement). Describe comparability of assessment methods if there is more than one group              | 7-8         |
| Bias                      | 9       | Describe any efforts to address potential sources of bias                                                                                                                                         | 5           |
| Study size                | 10      | Explain how the study size was arrived at                                                                                                                                                         | 6           |
| Quantitative variables    | 11      | Explain how quantitative variables were handled in the analyses. If applicable, describe which groupings were chosen and why                                                                      | 7-8         |
| Statistical methods       | 12      | (a) Describe all statistical methods, including those used to control for confounding                                                                                                             | 8-9         |
|                           |         | (b) Describe any methods used to examine subgroups and interactions                                                                                                                               | -           |
|                           |         | (c) Explain how missing data were addressed                                                                                                                                                       | 7           |
|                           |         | (d) If applicable, explain how loss to follow-up was addressed                                                                                                                                    | 8-9         |
|                           |         | (e) Describe any sensitivity analyses                                                                                                                                                             | -           |
| <b>Results</b>            |         |                                                                                                                                                                                                   |             |
| Participants              | 13*     | (a) Report numbers of individuals at each stage of study—eg numbers potentially eligible, examined for eligibility, confirmed eligible, included in the study, completing follow-up, and analysed | 9           |
|                           |         | (b) Give reasons for non-participation at each stage                                                                                                                                              | 9           |
|                           |         | (c) Consider use of a flow diagram                                                                                                                                                                | Figure 1    |
| Descriptive data          | 14*     | (a) Give characteristics of study participants (eg demographic, clinical, social) and information on exposures and potential confounders                                                          | Table S2    |
|                           |         | (b) Indicate number of participants with missing data for each variable of interest                                                                                                               | Table S2    |
|                           |         | (c) Summarise follow-up time (eg, average and total amount)                                                                                                                                       | 9           |
| Outcome                   | 15*     | Report numbers of outcome events or summary measures over time                                                                                                                                    | 9           |

|    |                          |    |                                                                                                                                                                                                              |          |
|----|--------------------------|----|--------------------------------------------------------------------------------------------------------------------------------------------------------------------------------------------------------------|----------|
| 1  | data                     |    |                                                                                                                                                                                                              |          |
| 2  | Main results             | 16 | (a) Give unadjusted estimates and, if applicable, confounder-adjusted estimates and their precision (eg, 95% confidence interval). Make clear which confounders were adjusted for and why they were included | 10-12    |
| 3  |                          |    | (b) Report category boundaries when continuous variables were categorized                                                                                                                                    | Table S2 |
| 4  |                          |    | (c) If relevant, consider translating estimates of relative risk into absolute risk for a meaningful time period                                                                                             | 9        |
| 5  | Other analyses           | 17 | Report other analyses done—eg analyses of subgroups and interactions, and sensitivity analyses                                                                                                               | 10-12    |
| 6  | <b>Discussion</b>        |    |                                                                                                                                                                                                              |          |
| 7  | Key results              | 18 | Summarise key results with reference to study objectives                                                                                                                                                     | 12       |
| 8  | Limitations              | 19 | Discuss limitations of the study, taking into account sources of potential bias or imprecision. Discuss both direction and magnitude of any potential bias                                                   | 13       |
| 9  | Interpretation           | 20 | Give a cautious overall interpretation of results considering objectives, limitations, multiplicity of analyses, results from similar studies, and other relevant evidence                                   | 12-13    |
| 10 | Generalisability         | 21 | Discuss the generalisability (external validity) of the study results                                                                                                                                        | 13       |
| 11 | <b>Other information</b> |    |                                                                                                                                                                                                              |          |
| 12 | Funding                  | 22 | Give the source of funding and the role of the funders for the present study and, if applicable, for the original study on which the present article is based                                                | 21       |

\*Give information separately for exposed and unexposed groups.

**Note:** An Explanation and Elaboration article discusses each checklist item and gives methodological background and published examples of transparent reporting. The STROBE checklist is best used in conjunction with this article (freely available on the Web sites of PLoS Medicine at <http://www.plosmedicine.org/>, Annals of Internal Medicine at <http://www.annals.org/>, and Epidemiology at <http://www.epidem.com/>). Information on the STROBE Initiative is available at <http://www.strobe-statement.org>.
