# Supplementary material for: Validation of breast cancer risk assessment tools on a French-Canadian population-based cohort
Source: PubMed Central journal article supplement — BMJ Open. 2021 Apr 12;11(4):e045078. doi: 10.1136/bmjopen-2020-045078 (PMC8047995; doi:10.1136/bmjopen-2020-045078), 2021-04-12
Supplement: bmjopen-2020-045078supp003.pdf [file bmjopen-2020-045078supp003.pdf]

Supplementary Table S1

| snp        | id*          | genes                   | wacholder** | evans | mavaddat | shieh | shieh_asian*** |
|------------|--------------|-------------------------|-------------|-------|----------|-------|----------------|
| rs13387042 | 2:217905832  | AC007749.1 - RN7SKP43   | 0.8/0.7     | 0,88  | 0,88     | 0,88  | 1,06           |
| rs1045485  | 2:202149589  | -                       | 0.89/0.69   | -     | 0,96     | -     | -              |
| rs999737   | 14:69034682  | RAD51B                  | 0.91/0.67   | -     | 0,92     | 0,92  | 0,93           |
| rs3817198  | 11:1909006   | LSP1                    | 1.04/1.18   | -     | 1,07     | 1,07  | 1,07           |
| rs889312   | 5:56031884   | C5orf67 - AC008940.1    | 1.05/1.1    | 1,12  | 1,12     | 1,12  | 1,05           |
| rs7716600  | 5:44875005   | AC093297.2 - AC114954.1 | 1.11/1.46   | -     | -        | -     | -              |
| rs13281615 | 8:128355618  | CASC8, POU5F1B, PCAT1   | 1.14/1.36   | -     | 1,09     | 1,09  | 1,03           |
| rs3803662  | 16:52586341  | CASC16                  | 1.16/1.44   | 1,23  | 1,23     | 1,24  | 1,15           |
| rs2981582  | 10:123352317 | FGFR2                   | 1.18/1.6    | -     | -        | -     | -              |
| rs11249433 | 1:121280613  | EMBP1                   | 1.23/1.3    | 1,09  | 1,10     | 1,09  | 1,16           |
| rs10995190 | 10:64278682  | AC024598.1, ZNF365      |             | 0,86  | 0,86     | 0,86  | 0,94           |
| rs1562430  | 8:128387852  | POU5F1B, CASC8, PCAT1   |             | 0,90  | -        | 1,16  | 1,16           |
| rs909116   | 11:1941946   | TNNT3                   |             | 0,93  | -        | -     | -              |
| rs1156287  | 17:53076799  | -                       |             | 0,93  | -        | -     | -              |
| rs713588   | 10:5886962   | -                       |             | 1,01  | -        | -     | -              |
| rs8009944  | 14:69039588  | -                       |             | 1,04  | -        | -     | -              |
| rs10931936 | 2:202143928  | -                       |             | 1,04  | -        | -     | -              |
| rs1011970  | 9:22062134   | CDKN2B-AS1              |             | 1,05  | 1,05     | 1,06  | 1,06           |
| rs704010   | 10:80841148  | ZMIZ1                   |             | 1,09  | 1,07     | 1,08  | 1,05           |
| rs4973768  | 3:27416013   | SLC4A7                  |             | 1,09  | 1,09     | 1,10  | 1,11           |
| rs9790879  | 5:44899885   | -                       |             | 1,09  | -        | -     | -              |
| rs3757318  | 6:151914113  | CCDC170                 |             | 1,16  | -        | 1,16  | 1,16           |
| rs614367   | 11:69328764  | LINC01488 - CCND1       |             | 1,21  | -        | 1,21  | 1,29           |
| rs2981579  | 10:123337335 | FGFR2                   |             | 1,27  | 1,25     | 1,27  | 1,27           |
| rs10771399 | 12:28155080  | PTHLH - CCDC91          |             | -     | 0,86     | 0,86  | 1,15           |
| rs865686   | 9:110888478  | CHCHD4P2 - AL353742.1   |             | -     | 0,90     | 0,89  | 1,04           |
| rs6828523  | 4:175846426  | ADAM29                  |             | -     | 0,91     | 0,90  | 1,11           |
| rs17356907 | 12:96027759  | PGAM1P5                 |             | -     | 0,91     | 0,91  | 1,08           |
| rs6472903  | 8:76230301   | CASC9                   |             | -     | 0,91     | 0,91  | 1,16           |
| rs4849887  | 2:121245122  | LINC01101 - AC073257.2  |             | -     | 0,92     | 0,91  | 1,07           |
| rs1353747  | 5:58337481   | AC092343.1, PDE4D       |             | -     | 0,92     | 0,92  | 1,00           |
| rs1292011  | 12:115836522 | AC078880.2 - AC009803.2 |             | -     | 0,92     | 0,92  | 1,11           |
| rs2236007  | 14:37132769  | PAX9                    |             | -     | 0,92     | 0,93  | 1,09           |
| rs2823093  | 21:16520832  | AF127577.5 - AF246928.1 |             | -     | 0,93     | 0,92  | 1,08           |
| rs17817449 | 16:53813367  | FTO                     |             | -     | 0,93     | 0,93  | 1,09           |
| rs6504950  | 17:53056471  | STXBP4                  |             | -     | 0,93     | 0,94  | 1,02           |
| rs4808801  | 19:18571141  | ELL                     |             | -     | 0,93     | 1,08  | 1,04           |
| rs2736108  | 5:1297488    | TERT - MIR4457          |             | -     | 0,94     | 0,94  | 0,94           |
| rs11242675 | 6:1318878    | FOXQ1 - LINC01394       |             | -     | 0,94     | 0,94  | 0,99           |
| rs616488   | 1:10566215   | PEX14                   |             | -     | 0,94     | 0,94  | 1,06           |
| rs11199914 | 10:123093901 | LINC01153 - RN7SKP167   |             | -     | 0,94     | 0,95  | 1,03           |
| rs3903072  | 11:65583066  | AP001266.1 - CFL1       |             | -     | 0,94     | 0,95  | 1,05           |
| rs1550623  | 2:174212894  | AC092573.2              |             | -     | 0,94     | 1,06  | 1,21           |
| rs720475   | 7:144074929  | ARHGEF5                 |             | -     | 0,95     | 0,94  | 1,02           |
| rs1436904  | 18:24570667  | CHST9, AQP4-AS1         |             | -     | 0,95     | 0,96  | 1,02           |
| rs2016394  | 2:172972971  | DLX2-DT                 |             | -     | 0,95     | -     | -              |
| rs527616   | 18:24337424  | AQP4-AS1                |             | -     | 0,96     | 0,95  | 1,03           |
| rs11820646 | 11:129461171 | AP003500.2              |             | -     | 0,96     | 0,95  | 1,05           |

Supplementary Table S1

|             |              |                            |   |      |      |      |
|-------------|--------------|----------------------------|---|------|------|------|
| rs2380205   | 10:5886734   | GDI2 - ANKRD16             | - | 0,98 | 0,94 | 1,02 |
| rs6678914   | 1:202187176  | LGR6                       | - | 0,99 | 0,91 | 1,10 |
| rs10069690  | 5:1279790    | TERT                       | - | 1,02 | 1,06 | 1,05 |
| rs75915166  | 11:69379161  | LINC01488 - CCND1          | - | 1,02 | 1,31 | 1,00 |
| rs12422552  | 12:14413931  | GNAI2P1 - RPL30P11         | - | 1,03 | 1,05 | 1,05 |
| rs4245739   | 1:204518842  | MDM4                       | - | 1,03 | 1,14 | 1,14 |
| rs8170      | 19:17389704  | USHBP1, AC010463.1, BABAM1 | - | 1,03 | 1,15 | 1,00 |
| rs2363956   | 19:17394124  | ANKLE1                     | - | 1,03 | -    | -    |
| rs10472076  | 5:58184061   | AC008852.1 - PDE4D         | - | 1,04 | 1,05 | 1,02 |
| rs12710696  | 2:19320803   | LINC01376                  | - | 1,04 | 1,10 | 1,10 |
| rs11075995  | 16:53855291  | FTO                        | - | 1,04 | 1,11 | 1,11 |
| rs7726159   | 5:1282319    | TERT                       | - | 1,04 | -    | -    |
| rs9790517   | 4:106084778  | TET2                       | - | 1,05 | 1,05 | 1,02 |
| rs204247    | 6:13722523   | RANBP9 - MCUR1             | - | 1,05 | 1,05 | 1,03 |
| rs10759243  | 9:110306115  | PPIAP88 - RNU6-996P        | - | 1,05 | 1,06 | 1,05 |
| rs12493607  | 3:30682939   | TGFBR2                     | - | 1,05 | 1,06 | 1,05 |
| rs2046210   | 6:151948366  | CCDC170 - ESR1             | - | 1,05 | 1,15 | 1,27 |
| rs17529111  | 6:82128386   | AL590824.1 - TENT5A        | - | 1,05 | -    | -    |
| rs7904519   | 10:114773927 | TCF7L2                     | - | 1,06 | 1,06 | 1,02 |
| rs3760982   | 19:44286513  | KCNN4 - LYPD5              | - | 1,06 | 1,06 | 1,02 |
| rs941764    | 14:91841069  | CCDC88C                    | - | 1,06 | 1,06 | 1,05 |
| rs7072776   | 10:22032942  | MLLT10 - DNAJC1            | - | 1,06 | 1,07 | 1,04 |
| rs11780156  | 8:129194641  | PVT1                       | - | 1,07 | 1,07 | 1,00 |
| rs6762644   | 3:4742276    | ITPR1                      | - | 1,07 | 1,07 | 1,03 |
| rs9693444   | 8:29509616   | RPL17P33 - LINC00589       | - | 1,07 | 1,07 | 1,08 |
| rs1432679   | 5:158244083  | EBF1                       | - | 1,07 | 1,07 | 1,09 |
| rs2588809   | 14:68660428  | RAD51B                     | - | 1,07 | 1,08 | 1,06 |
| rs16857609  | 2:218296508  | DIRC3                      | - | 1,07 | 1,08 | 1,07 |
| rs11552449  | 1:114448389  | DCLRE1B                    | - | 1,08 | 1,07 | 1,03 |
| rs13329835  | 16:80650805  | CDYL2                      | - | 1,08 | 1,08 | 1,02 |
| rs132390    | 22:29621477  | EMID1                      | - | 1,11 | 1,12 | 1,00 |
| rs10941679  | 5:44706498   | AC093292.1 - RN7SL383P     | - | 1,12 | 1,13 | 1,08 |
| rs554219    | 11:69331642  | LINC01488 - CCND1          | - | 1,12 | 1,27 | 1,00 |
| rs6001930   | 22:40876234  | MRTFA                      | - | 1,13 | 1,12 | 1,03 |
| rs2943559   | 8:76417937   | HNF4G                      | - | 1,13 | 1,13 | 0,96 |
| rs12662670  | 6:151918856  | CCDC170                    | - | 1,14 | -    | -    |
| rs78540526  | 11:69331418  | LINC01488 - CCND1          | - | 1,18 | -    | -    |
| rs11814448  | 10:22315843  | DNAJC1 - ADIPOR1P1         | - | 1,22 | 1,26 | 1,08 |
| rs11571833  | 13:32972626  | BRCA2                      | - | 1,26 | 1,26 | 1,00 |
| rs17879961  | 22:29121087  | CHEK2                      | - | 1,36 | 1,36 | 1,00 |
| rs140068132 | 6:151954834  | CCDC170 - ESR1             | - | -    | 0,60 | 1,00 |
| rs10822013  | 10:64251977  | AC024598.1, ZNF365         | - | -    | 0,89 | 1,08 |
| rs9485372   | 6:149608874  | TAB2                       | - | -    | 0,90 | 1,11 |
| rs10474352  | 5:90732225   | ARRDC3-AS1                 | - | -    | 0,92 | 1,09 |
| rs2290203   | 15:91512067  | PRC1, AC068831.7, PRC1-AS1 | - | -    | 0,93 | 1,08 |
| rs17530068  | 6:82193109   | AL590824.1 - TENT5A        | - | -    | 1,05 | 1,05 |
| rs9383938   | 6:151987357  | ESR1                       | - | -    | 1,08 | 1,08 |
| rs4951011   | 1:203766331  | ZBED6, ZC3H11A             | - | -    | 1,09 | 1,09 |
| rs2284378   | 20:32588095  | RALY                       | - | -    | 1,10 | 1,10 |

Supplementary Table S1

|           |             |                        |   |   |      |      |
|-----------|-------------|------------------------|---|---|------|------|
| rs2392780 | 8:128388025 | POU5F1B, CASC8, PCAT1  | - | - | 1,15 | 1,00 |
| rs4415084 | 5:44662515  | LINC02224 - AC093292.1 | - | - | 1,17 | 1,00 |
| rs3822625 | 5:56178111  | MAP3K1                 | - | - | 1,36 | 1,36 |
| rs7726354 | 5:56256483  | MIER3                  | - | - | 1,37 | 1,37 |

\* SNPs' position were based on build GRCh37/hg19

\*\* OR for one allele/two alleles

\*\*\* OR from Shieh's study used for Asian women

Supplementary Table S1
