# Supplementary material for: Validation of breast cancer risk assessment tools on a French-Canadian population-based cohort
Source: PubMed Central journal article supplement — BMJ Open. 2021 Apr 12;11(4):e045078. doi: 10.1136/bmjopen-2020-045078 (PMC8047995; doi:10.1136/bmjopen-2020-045078), 2021-04-12
Supplement: bmjopen-2020-045078supp004.pdf [file bmjopen-2020-045078supp004.pdf]

Table S2

|                                            | Clinical-based cohort | Clinicogenetic-based cohort |
|--------------------------------------------|-----------------------|-----------------------------|
|                                            | N=10,200              | N=4,555                     |
| Breast cancer within 5 years               | 131 (1.28%)           | 58 (1.27%)                  |
| BCRAT absolute risk (%)                    | 1.30 (0.74)           | 1.33 (0.73)                 |
| IBIS absolute risk (%)                     | 1.31 (0.59)           | 1.33 (0.60)                 |
| Age at baseline (years)                    | 54.1 (7.7)            | 54.1 (7.6)                  |
| Age categories:                            |                       |                             |
| <=49                                       | 3,556 (34.9%)         | 1,557 (34.2%)               |
| 50-59                                      | 3,980 (39.0%)         | 1,839 (40.4%)               |
| >=60                                       | 2,664 (26.1%)         | 1,159 (25.4%)               |
| Birth province:                            |                       |                             |
| In Canada outside Quebec                   | 333 (3.3%)            | 74 (1.6%)                   |
| Outside Canada                             | 1,490 (14.6%)         | 189 (4.1%)                  |
| Quebec                                     | 8,373 (82.1%)         | 4,292 (94.2%)               |
| Missing                                    | 4                     | 0                           |
| Ethnicity:                                 |                       |                             |
| Asian                                      | 188 (1.8%)            | 5 (0.1%)                    |
| Black African                              | 182 (1.8%)            | 0 (0.0%)                    |
| Hispanic non-american                      | 234 (2.3%)            | 1 (<0.1%)                   |
| Other                                      | 542 (5.3%)            | 86 (1.9%)                   |
| White/European                             | 9,054 (88.8%)         | 4,463 (98.0%)               |
| Age at menarche (years):                   |                       |                             |
| <=11                                       | 2,305 (22.9%)         | 1,027 (22.7%)               |
| 12-13                                      | 4,754 (47.2%)         | 2,166 (47.9%)               |
| >=14                                       | 3,021 (30.0%)         | 1,331 (29.4%)               |
| Missing                                    | 120                   | 31                          |
| Age at first live birth (years):           |                       |                             |
| <=19                                       | 1,124 (13.1%)         | 422 (11.1%)                 |
| 20-24                                      | 2,955 (34.5%)         | 1,324 (34.8%)               |
| 25-29                                      | 2,814 (32.9%)         | 1,312 (34.5%)               |
| >=30                                       | 1,621 (19.0%)         | 734 (19.3%)                 |
| Nulliparous                                | 40 (0.5%)             | 14 (0.4%)                   |
| Missing                                    | 1,646                 | 749                         |
| First-degree relatives with breast cancer: |                       |                             |
| 0                                          | 8,945 (87.7%)         | 3,949 (86.7%)               |
| 1                                          | 1,130 (11.1%)         | 556 (12.2%)                 |
| >=2                                        | 125 (1.23%)           | 50 (1.10%)                  |
| Previous breast biopsy:                    |                       |                             |
| 0                                          | 10,023 (98.3%)        | 4,463 (98.0%)               |

|                                 |                                       |                  |                  |
|---------------------------------|---------------------------------------|------------------|------------------|
|                                 | 1                                     | 134 (1.31%)      | 71 (1.56%)       |
|                                 | >=2                                   | 43 (0.42%)       | 21 (0.46%)       |
| History of hyperplasia          |                                       | 6 (0.06%)        | 1 (0.02%)        |
| History of atypical hyperplasia |                                       | 1 (0.56%)        | 0 (0.00%)        |
| Lobular Carcinoma In Situ       |                                       | 0                | 0                |
| Weight (Kg)                     |                                       | 67.4 [59.4;78.0] | 66.8 [59.6;76.8] |
| Height (m)                      |                                       | 1.61 [1.57;1.65] | 1.61 [1.57;1.65] |
| History of ovary cancer         |                                       | 94 (0.92%)       | 46 (1.01%)       |
| Menopause occurrence            |                                       |                  |                  |
|                                 | Pre-menopausal                        | 4176 (40.9%)     | 1891 (41.5%)     |
|                                 | Post-menopausal                       | 5885 (57.7%)     | 2617 (57.5%)     |
|                                 | Unknown                               | 139 (1.36%)      | 47 (1.03%)       |
| Use of HRT                      |                                       |                  |                  |
|                                 | Never                                 | 7477 (73.3%)     | 3249 (71.3%)     |
|                                 | Previous user (more than 5 years ago) | 1126 (11.0%)     | 506 (11.1%)      |
|                                 | Previous user (less than 5 years ago) | 1285 (12.6%)     | 646 (14.2%)      |
|                                 | Current user                          | 312 (3.06%)      | 154 (3.38%)      |
| HRT length of use (years)       |                                       | 0.00 [0.00;1.00] | 0.00 [0.00;1.00] |
| Last HRT use (years)            |                                       | 0.00 [0.00;0.00] | 0.00 [0.00;0.00] |
| Mother history of breast cancer |                                       | 832 (8.16%)      | 412 (9.05%)      |
| Mother history of ovary cancer  |                                       | 114 (1.12%)      | 60 (1.32%)       |
| Father history of breast cancer |                                       | 8 (0.08%)        | 2 (0.04%)        |

HRT: hormonal replacement therapy; PRS: polygenic risk score; clinical-based cohort: validation of the BCRAT and IBIS models, included women with a BCRAT and an IBIS score; clinico-genetic-based cohort: validation of the PRS models and comparison with the BCRAT and IBIS models, genotyped women with all SNPs available.

\* Not available for the phase 2
