# Supplementary figures and images for: Validation of breast cancer risk assessment tools on a French-Canadian population-based cohort
Source: PubMed Central journal article supplement — BMJ Open. 2021 Apr 12;11(4):e045078. doi: 10.1136/bmjopen-2020-045078 (PMC8047995; doi:10.1136/bmjopen-2020-045078), 2021-04-12

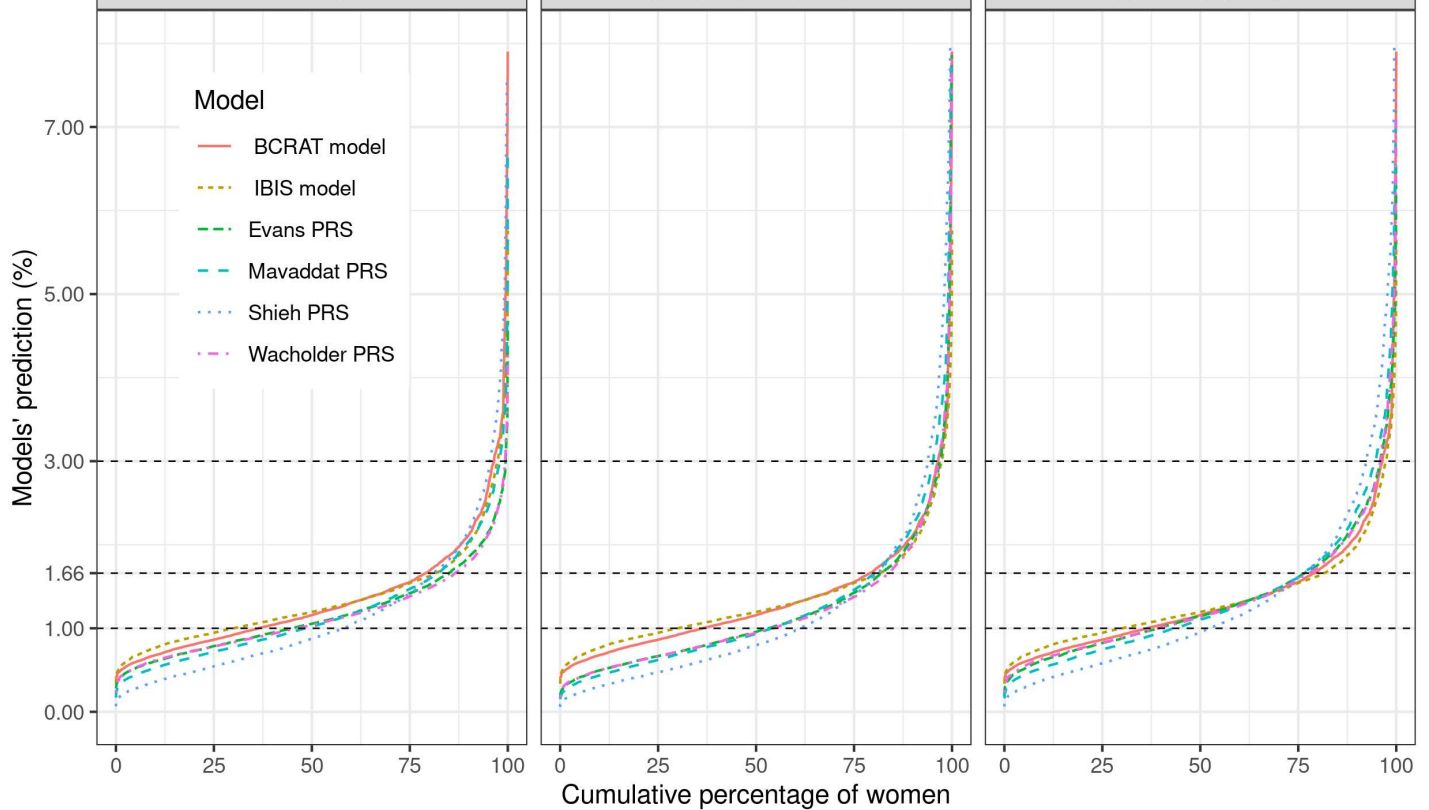

Supplement: bmjopen-2020-045078supp001.pdf [file bmjopen-2020-045078supp001.pdf]
