# Supplementary figures and images for: Validation of breast cancer risk assessment tools on a French-Canadian population-based cohort
Source: HighWire-hosted journal article supplement (doi:10.1136/bmjopen-2020-045078), 2021-04-01

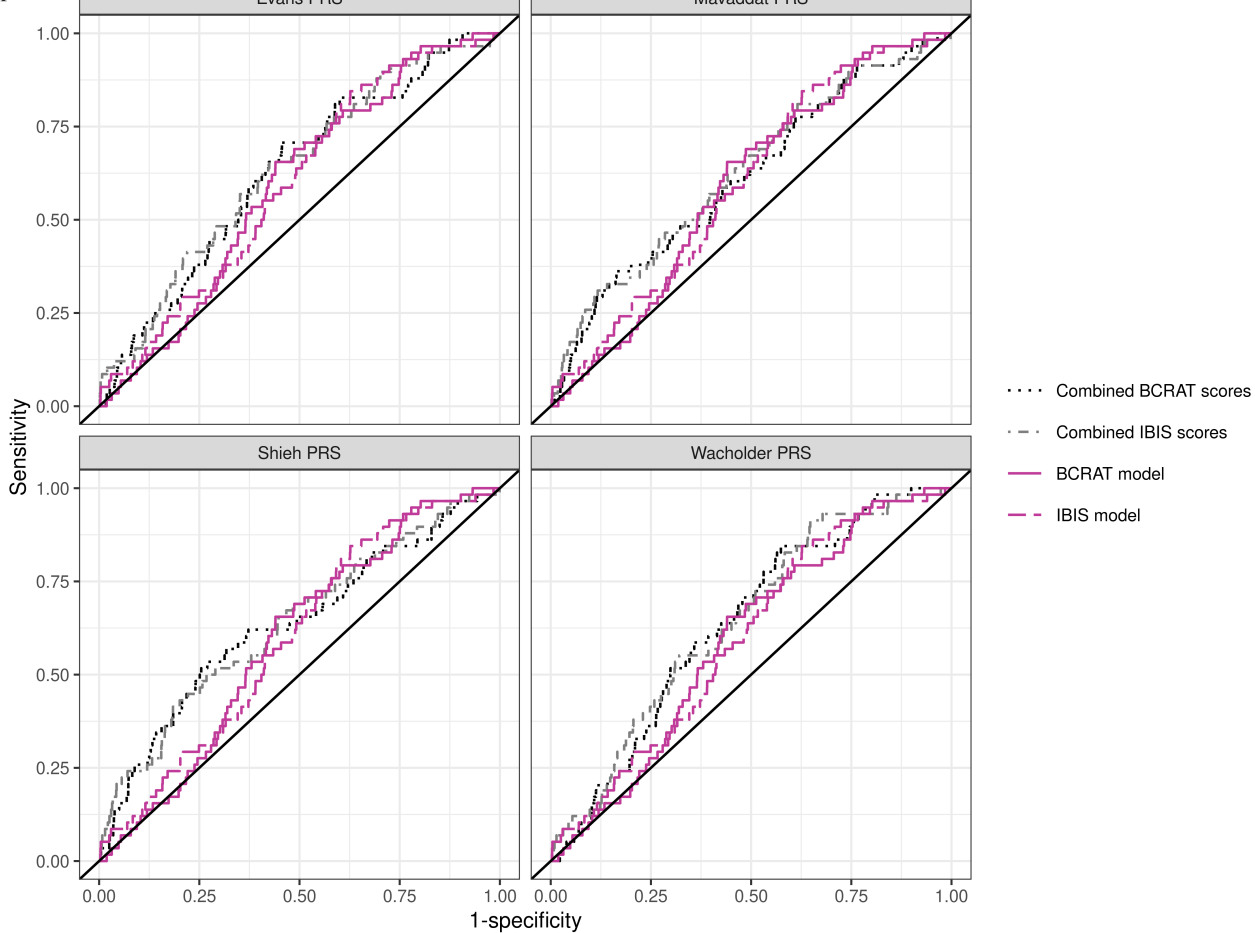

Supplement: bmjopen-2020-045078supp002_data_supplement.pdf [file bmjopen-2020-045078supp002_data_supplement.pdf]
